# Supplementary material for: Metasurface-based solar cell covers with self-enhancing efficiency, self-cleaning and self-cooling
Source: Research Square preprint supplement (doi:10.21203/rs.3.rs-7183887/v1), 2025-07-31
Supplement: Supplementary file 1 [file 4aa04ee5d5177d19360de6b7.xlsx]

## Sheet: Figure 2c
Figure 2c	Photocurrent distribution at different positions of the GaAs solar cell with an ESFZP cover.
Coordinate X (mm)	Coordinate Y (mm)	Current density(A)
0	8	-9.33623e-10	-1.21579e-09	-1.06589e-09	-1.21635e-09	-1.07491e-09	-1.20187e-09	-1.19111e-09	-1.24693e-09	-1.18587e-09	-1.48779e-09	-1.30451e-09	-1.37493e-09	-1.73868e-09	-2.6984e-09	-3.15255e-09	-3.05707e-09	-2.37778e-09	-1.71562e-09	-1.92657e-09	-1.97589e-09	-2.09037e-09	-1.99521e-09	-2.14152e-09	-2.09594e-09	-2.25345e-09	-2.33745e-09	-2.33762e-09	-2.36032e-09	-2.28064e-09	-2.26999e-09	-2.23028e-09	-2.52221e-09	-2.42311e-09	-2.09353e-09	-1.94462e-09	-1.9745e-09	-2.07286e-09	-2.02583e-09	-2.07243e-09	-1.97721e-09	-1.88084e-09	-2.0656e-09	-3.55483e-09	-2.04924e-09	-2.16432e-09	-2.46869e-09	-2.85525e-09	-4.31568e-09
0.1	7.9	-1.08934e-09	-1.16968e-09	-1.20892e-09	-1.23873e-09	-1.20009e-09	-1.23061e-09	-1.26211e-09	-1.21283e-09	-1.19826e-09	-1.50419e-09	-1.34664e-09	-1.48805e-09	-1.60667e-09	-2.23176e-09	-3.07642e-09	-3.36385e-09	-3.11274e-09	-2.29539e-09	-1.99434e-09	-2.35292e-09	-2.42399e-09	-2.4084e-09	-2.49795e-09	-3.54282e-09	-3.17792e-09	-3.5468e-09	-3.88165e-09	-3.96582e-09	-3.89642e-09	-3.62532e-09	-3.29722e-09	-3.26408e-09	-4.33512e-09	-4.21657e-09	-2.27086e-09	-2.41235e-09	-2.32328e-09	-2.11515e-09	-2.14488e-09	-2.03129e-09	-2.06204e-09	-2.24699e-09	-2.34405e-09	-2.54693e-09	-2.90702e-09	-4.53009e-09	-1.08867e-08	-2.30541e-08
0.2	7.8	-1.05562e-09	-1.11029e-09	-1.24983e-09	-1.23821e-09	-1.34713e-09	-1.24619e-09	-1.22953e-09	-1.29918e-09	-1.4135e-09	-1.51425e-09	-1.42688e-09	-1.63452e-09	-1.53273e-09	-1.94783e-09	-2.79536e-09	-3.43907e-09	-3.70096e-09	-3.08009e-09	-2.54015e-09	-2.56889e-09	-2.97987e-09	-3.75555e-09	-6.08468e-09	-1.20331e-08	-2.13149e-08	-3.06926e-08	-3.35453e-08	-3.34521e-08	-2.87388e-08	-2.19449e-08	-1.30166e-08	-7.53002e-09	-5.03458e-09	-4.1042e-09	-3.2153e-09	-2.61984e-09	-2.49647e-09	-2.38803e-09	-2.203e-09	-2.3568e-09	-2.4756e-09	-2.45621e-09	-2.77859e-09	-3.86673e-09	-1.01172e-08	-2.69944e-08	-5.41174e-08	-7.53924e-08
0.3	7.7	-9.82587e-10	-1.19616e-09	-1.27186e-09	-1.24756e-09	-1.17941e-09	-1.44628e-09	-1.24702e-09	-1.37024e-09	-1.40611e-09	-1.53655e-09	-1.63969e-09	-1.66302e-09	-1.48835e-09	-1.71879e-09	-2.28868e-09	-3.30177e-09	-3.74598e-09	-3.88355e-09	-3.47036e-09	-4.06299e-09	-1.04488e-08	-2.38165e-08	-4.82057e-08	-7.67364e-08	-9.71688e-08	-1.11475e-07	-1.08181e-07	-1.05566e-07	-1.0199e-07	-9.53884e-08	-7.69561e-08	-4.87985e-08	-2.14261e-08	-9.272e-09	-5.00202e-09	-4.05352e-09	-3.32997e-09	-2.68187e-09	-2.49478e-09	-2.5062e-09	-2.59778e-09	-2.93e-09	-5.28722e-09	-1.70659e-08	-4.58856e-08	-6.20797e-08	-7.23739e-08	-8.70972e-08
0.4	7.6	-1.0985e-09	-1.22295e-09	-1.24717e-09	-1.26259e-09	-1.19048e-09	-1.22946e-09	-1.28817e-09	-1.41974e-09	-1.54264e-09	-1.54972e-09	-1.58021e-09	-1.6594e-09	-1.69508e-09	-1.87895e-09	-2.02897e-09	-2.73604e-09	-3.88991e-09	-4.57162e-09	-6.42628e-09	-1.93831e-08	-5.84872e-08	-9.72861e-08	-1.16339e-07	-1.25365e-07	-1.29686e-07	-1.38693e-07	-1.37358e-07	-1.37486e-07	-1.33405e-07	-1.29015e-07	-1.24527e-07	-1.00394e-07	-6.9159e-08	-4.23961e-08	-1.63897e-08	-6.29559e-09	-4.39109e-09	-3.72514e-09	-3.13932e-09	-2.95229e-09	-3.14228e-09	-5.68342e-09	-1.96322e-08	-5.10772e-08	-6.42261e-08	-6.18918e-08	-7.84553e-08	-9.49318e-08
0.5	7.5	-1.0791e-09	-1.20882e-09	-1.18994e-09	-1.27051e-09	-1.30266e-09	-1.30308e-09	-1.2768e-09	-1.52173e-09	-1.63301e-09	-1.63723e-09	-1.68527e-09	-1.76723e-09	-1.72765e-09	-1.91966e-09	-2.18799e-09	-2.61853e-09	-3.90405e-09	-8.10986e-09	-2.86545e-08	-7.87555e-08	-1.19028e-07	-1.27783e-07	-1.26357e-07	-1.29169e-07	-1.31644e-07	-1.42147e-07	-1.47482e-07	-1.50016e-07	-1.40918e-07	-1.3515e-07	-1.3177e-07	-1.23563e-07	-9.84468e-08	-7.50062e-08	-5.15592e-08	-2.57888e-08	-8.85496e-09	-4.83476e-09	-4.52643e-09	-3.71758e-09	-5.12054e-09	-1.84659e-08	-5.60168e-08	-6.18871e-08	-5.76899e-08	-6.14962e-08	-7.89421e-08	-9.61629e-08
0.6	7.4	-9.89361e-10	-1.16486e-09	-1.21389e-09	-1.30071e-09	-1.27581e-09	-1.36478e-09	-1.46182e-09	-1.61579e-09	-1.61367e-09	-1.78166e-09	-1.79097e-09	-1.90784e-09	-1.97713e-09	-2.29538e-09	-2.61401e-09	-2.91167e-09	-6.65197e-09	-2.87279e-08	-8.48345e-08	-1.26429e-07	-1.31311e-07	-1.3975e-07	-1.40886e-07	-1.48501e-07	-1.41207e-07	-1.45208e-07	-1.55339e-07	-1.60138e-07	-1.45575e-07	-1.35616e-07	-1.28559e-07	-1.23396e-07	-1.07421e-07	-8.45741e-08	-8.06103e-08	-7.72059e-08	-3.44624e-08	-8.51099e-09	-5.83734e-09	-5.31545e-09	-1.13897e-08	-4.52703e-08	-8.57849e-08	-6.27014e-08	-5.7912e-08	-6.72759e-08	-8.47922e-08	-9.78018e-08
0.7	7.3	-9.79276e-10	-1.32283e-09	-1.38936e-09	-1.52866e-09	-1.58658e-09	-1.90128e-09	-2.05482e-09	-2.02554e-09	-1.99569e-09	-1.98212e-09	-2.0638e-09	-2.71674e-09	-2.28043e-09	-2.5631e-09	-2.93113e-09	-4.87628e-09	-2.10743e-08	-7.05864e-08	-1.12691e-07	-1.30427e-07	-1.4145e-07	-1.52058e-07	-1.52088e-07	-1.52789e-07	-1.43053e-07	-1.43851e-07	-1.61379e-07	-1.65086e-07	-1.51764e-07	-1.44996e-07	-1.31277e-07	-1.22018e-07	-1.05085e-07	-7.8049e-08	-9.29405e-08	-1.10283e-07	-8.03865e-08	-2.92097e-08	-8.76483e-09	-7.95025e-09	-1.87878e-08	-4.9822e-08	-8.62421e-08	-6.24459e-08	-4.72205e-08	-5.16022e-08	-7.55338e-08	-8.26786e-08
0.8	7.2	-1.82895e-09	-1.84741e-09	-1.8914e-09	-1.81657e-09	-2.36099e-09	-2.39979e-09	-2.79678e-09	-2.78556e-09	-2.64876e-09	-2.47604e-09	-2.39559e-09	-2.53523e-09	-2.72551e-09	-2.88557e-09	-3.75574e-09	-1.34707e-08	-5.4382e-08	-1.05645e-07	-1.20794e-07	-1.34649e-07	-1.45416e-07	-1.57002e-07	-1.5503e-07	-1.57236e-07	-1.45709e-07	-1.4278e-07	-1.58902e-07	-1.66241e-07	-1.5097e-07	-1.43107e-07	-1.26774e-07	-1.16333e-07	-1.0335e-07	-8.50053e-08	-9.80665e-08	-1.24788e-07	-1.12744e-07	-6.39648e-08	-1.79472e-08	-1.36495e-08	-3.75228e-08	-5.77561e-08	-8.28927e-08	-6.65999e-08	-4.67681e-08	-4.72138e-08	-6.9447e-08	-7.19305e-08
0.9	7.1	-2.33139e-09	-2.22696e-09	-2.358e-09	-2.26943e-09	-2.7872e-09	-8.28534e-09	-3.97844e-09	-3.39125e-09	-2.7102e-09	-2.55698e-09	-2.63302e-09	-2.68363e-09	-3.01872e-09	-3.32808e-09	-6.18886e-09	-3.06024e-08	-9.5312e-08	-1.40901e-07	-1.3216e-07	-1.29883e-07	-1.48264e-07	-1.55457e-07	-1.54444e-07	-1.47817e-07	-1.43735e-07	-1.38356e-07	-1.51803e-07	-1.61766e-07	-1.56947e-07	-1.54701e-07	-1.40801e-07	-1.33886e-07	-1.21156e-07	-1.11756e-07	-1.05481e-07	-1.05352e-07	-1.04833e-07	-7.52119e-08	-3.40592e-08	-2.47974e-08	-5.25212e-08	-5.56544e-08	-7.16286e-08	-6.86761e-08	-5.06098e-08	-4.85098e-08	-6.30153e-08	-6.51236e-08
1	7	-2.62349e-09	-2.88264e-09	-2.8832e-09	-2.62836e-09	-3.27292e-09	-3.60278e-09	-3.56609e-09	-2.7573e-09	-2.6456e-09	-2.79784e-09	-2.6657e-09	-2.84376e-09	-3.25232e-09	-4.18214e-09	-1.20333e-08	-5.36639e-08	-1.0847e-07	-1.2094e-07	-1.18048e-07	-1.32032e-07	-1.35403e-07	-1.46787e-07	-1.47797e-07	-1.36768e-07	-1.48983e-07	-1.64649e-07	-1.62949e-07	-1.7719e-07	-1.73472e-07	-1.75401e-07	-1.59019e-07	-1.53869e-07	-1.43734e-07	-1.3269e-07	-1.10171e-07	-8.30103e-08	-8.83354e-08	-9.44532e-08	-6.48552e-08	-4.3911e-08	-6.49798e-08	-5.37557e-08	-6.04249e-08	-7.47647e-08	-7.13233e-08	-6.80521e-08	-7.28209e-08	-6.20948e-08
1.1	6.9	-2.79546e-09	-3.54694e-09	-3.21047e-09	-3.22612e-09	-3.53125e-09	-3.47333e-09	-3.08509e-09	-2.68275e-09	-2.7208e-09	-2.84636e-09	-3.26414e-09	-3.47979e-09	-3.7177e-09	-4.97218e-09	-2.2075e-08	-7.40177e-08	-1.01946e-07	-1.00839e-07	-1.11996e-07	-1.40213e-07	-1.41265e-07	-1.47299e-07	-1.50833e-07	-1.31836e-07	-1.51437e-07	-1.79603e-07	-1.81924e-07	-1.89811e-07	-1.85496e-07	-1.86358e-07	-1.6738e-07	-1.60938e-07	-1.47707e-07	-1.402e-07	-1.27147e-07	-9.76542e-08	-8.88503e-08	-9.71275e-08	-8.98317e-08	-7.33317e-08	-8.30652e-08	-7.3157e-08	-6.49711e-08	-7.91597e-08	-8.95971e-08	-7.23892e-08	-8.13895e-08	-7.4937e-08
1.2	6.8	-2.47065e-09	-3.50231e-09	-3.16016e-09	-3.16866e-09	-3.07253e-09	-2.92576e-09	-2.75939e-09	-2.68563e-09	-2.80834e-09	-2.95797e-09	-3.30996e-09	-3.62414e-09	-4.27607e-09	-7.33682e-09	-4.06985e-08	-1.05719e-07	-1.14838e-07	-1.05798e-07	-1.13107e-07	-1.40906e-07	-1.41316e-07	-1.50846e-07	-1.65907e-07	-1.72764e-07	-1.85289e-07	-1.91909e-07	-2.01967e-07	-2.08033e-07	-2.04056e-07	-2.00745e-07	-1.80367e-07	-1.71476e-07	-1.62186e-07	-1.51067e-07	-1.50867e-07	-1.34824e-07	-1.27144e-07	-1.27479e-07	-1.36459e-07	-1.36338e-07	-1.21307e-07	-1.25171e-07	-1.24581e-07	-1.17275e-07	-1.19988e-07	-1.1389e-07	-1.22137e-07	-1.19294e-07
1.3	6.7	-2.39713e-09	-3.23827e-09	-2.553e-09	-2.98953e-09	-3.45253e-09	-3.01705e-09	-2.99708e-09	-2.86367e-09	-2.87169e-09	-3.59877e-09	-3.74031e-09	-4.9195e-09	-6.49956e-09	-9.16247e-09	-1.02229e-07	-2.14467e-07	-2.144e-07	-2.22535e-07	-2.17398e-07	-2.00716e-07	-1.99377e-07	-2.06411e-07	-2.1938e-07	-2.23497e-07	-2.48633e-07	-2.63939e-07	-2.81935e-07	-2.82898e-07	-2.83695e-07	-2.82766e-07	-2.62288e-07	-2.54089e-07	-2.30178e-07	-2.12353e-07	-2.08085e-07	-2.2991e-07	-2.33535e-07	-2.11791e-07	-2.1835e-07	-2.37151e-07	-2.55171e-07	-2.81811e-07	-3.04385e-07	-2.97539e-07	-2.94602e-07	-3.0544e-07	-3.34287e-07	-3.55698e-07
1.4	6.6	-2.63934e-09	-2.84075e-09	-3.01438e-09	-3.12166e-09	-3.29097e-09	-3.14686e-09	-3.09166e-09	-2.92514e-09	-3.37913e-09	-3.86012e-09	-4.48035e-09	-4.80824e-09	-5.37087e-09	-1.14873e-08	-1.61586e-07	-2.44048e-07	-2.34633e-07	-2.52826e-07	-2.71064e-07	-2.5974e-07	-2.65964e-07	-2.53375e-07	-3.01417e-07	-3.44558e-07	-3.62727e-07	-3.79825e-07	-3.95523e-07	-3.52576e-07	-4.09393e-07	-3.95848e-07	-3.74469e-07	-3.7255e-07	-3.69398e-07	-3.67501e-07	-3.65251e-07	-3.61643e-07	-3.7544e-07	-3.80725e-07	-3.87179e-07	-3.95399e-07	-4.08851e-07	-4.22382e-07	-4.37318e-07	-4.45492e-07	-4.41111e-07	-4.52155e-07	-4.67387e-07	-4.7423e-07
1.5	6.5	-2.14839e-09	-2.65775e-09	-3.27538e-09	-3.20385e-09	-3.00181e-09	-2.65186e-09	-2.94642e-09	-3.06929e-09	-3.66857e-09	-4.363e-09	-6.03906e-09	-7.99482e-09	-1.39389e-08	-2.60512e-08	-1.55504e-07	-2.68635e-07	-2.56077e-07	-2.91915e-07	-3.55188e-07	-2.67145e-07	-3.71824e-07	-3.70538e-07	-4.10137e-07	-4.37998e-07	-3.68168e-07	-4.40096e-07	-4.3953e-07	-5.01528e-07	-4.96312e-07	-4.90308e-07	-4.75179e-07	-4.75687e-07	-4.86096e-07	-4.85988e-07	-4.73123e-07	-4.17512e-07	-4.85558e-07	-4.86802e-07	-4.87925e-07	-4.89375e-07	-4.90822e-07	-4.93299e-07	-4.94619e-07	-4.94406e-07	-4.29632e-07	-4.83193e-07	-4.99519e-07	-4.96137e-07
1.6	6.4	-1.87713e-09	-2.30609e-09	-2.8089e-09	-3.33943e-09	-3.22145e-09	-3.11348e-09	-3.54214e-09	-3.84488e-09	-5.83994e-09	-1.39875e-08	-3.11882e-08	-5.15069e-08	-6.81365e-08	-8.24275e-08	-1.21071e-07	-3.71711e-07	-3.87502e-07	-3.91468e-07	-4.32589e-07	-4.77982e-07	-4.28945e-07	-4.85927e-07	-5.00696e-07	-4.94303e-07	-4.90668e-07	-3.75015e-07	-4.61333e-07	-5.25732e-07	-5.20798e-07	-5.15549e-07	-5.07808e-07	-5.05137e-07	-5.0621e-07	-5.04554e-07	-4.92721e-07	-4.29963e-07	-5.02425e-07	-5.00749e-07	-4.94218e-07	-4.81345e-07	-4.78973e-07	-4.96942e-07	-5.01235e-07	-4.99329e-07	-4.32294e-07	-4.83216e-07	-5.0085e-07	-4.99834e-07
1.7	6.3	-1.8522e-09	-2.25134e-09	-2.54268e-09	-2.86467e-09	-3.14455e-09	-3.47564e-09	-4.06289e-09	-7.76113e-09	-2.55158e-08	-6.25494e-08	-9.15069e-08	-1.02379e-07	-1.0825e-07	-1.09436e-07	-1.10215e-07	-3.52926e-07	-4.27239e-07	-4.22406e-07	-4.92006e-07	-4.90716e-07	-5.06598e-07	-4.83566e-07	-5.07337e-07	-5.10979e-07	-5.2611e-07	-4.59693e-07	-4.61805e-07	-5.17886e-07	-5.09802e-07	-5.15607e-07	-5.13103e-07	-5.09805e-07	-5.06181e-07	-5.04405e-07	-4.92701e-07	-4.34663e-07	-5.02265e-07	-5.00879e-07	-4.96279e-07	-4.87278e-07	-4.88285e-07	-4.97613e-07	-5.03148e-07	-4.98552e-07	-4.35072e-07	-4.77987e-07	-5.01045e-07	-4.99102e-07
1.8	6.2	-2.18296e-09	-2.23781e-09	-2.41613e-09	-2.76194e-09	-3.2242e-09	-4.06063e-09	-1.00545e-08	-3.2892e-08	-7.43488e-08	-1.0612e-07	-1.1066e-07	-1.12127e-07	-1.15812e-07	-1.12648e-07	-1.1163e-07	-3.92282e-07	-4.31848e-07	-4.19686e-07	-4.91541e-07	-5.01958e-07	-5.12074e-07	-5.1317e-07	-5.06845e-07	-5.29413e-07	-5.39893e-07	-4.96168e-07	-4.63877e-07	-5.25388e-07	-5.20672e-07	-5.16745e-07	-5.16816e-07	-5.09181e-07	-5.04759e-07	-5.04006e-07	-4.9658e-07	-4.37447e-07	-5.02886e-07	-5.02397e-07	-5.0232e-07	-5.015e-07	-5.00715e-07	-5.00772e-07	-4.99218e-07	-4.98379e-07	-4.3506e-07	-4.73697e-07	-5.01404e-07	-5.00849e-07
1.9	6.1	-2.47355e-09	-2.56746e-09	-2.51315e-09	-2.99014e-09	-3.79402e-09	-1.22823e-08	-4.33449e-08	-8.60397e-08	-1.06168e-07	-1.13083e-07	-1.17171e-07	-1.1614e-07	-1.28324e-07	-1.17777e-07	-1.08263e-07	-3.9801e-07	-4.45268e-07	-4.3113e-07	-5.01386e-07	-3.69945e-07	-5.1151e-07	-5.05405e-07	-5.33664e-07	-5.48378e-07	-5.4543e-07	-4.9948e-07	-4.66177e-07	-5.30668e-07	-5.24432e-07	-5.14556e-07	-5.0994e-07	-5.04909e-07	-5.0668e-07	-5.08653e-07	-4.97221e-07	-4.33841e-07	-5.04123e-07	-5.04107e-07	-5.03367e-07	-5.03071e-07	-5.0251e-07	-5.02275e-07	-5.01388e-07	-5.01264e-07	-4.37674e-07	-4.71878e-07	-4.99846e-07	-4.97203e-07
2	6	-2.39168e-09	-2.61523e-09	-2.60723e-09	-3.2715e-09	-1.0014e-08	-4.38483e-08	-1.01545e-07	-1.21612e-07	-1.25933e-07	-1.22865e-07	-1.32956e-07	-1.27433e-07	-1.34561e-07	-1.16833e-07	-1.19702e-07	-3.9103e-07	-4.57153e-07	-4.12073e-07	-5.04954e-07	-5.18547e-07	-5.366e-07	-5.45721e-07	-5.48359e-07	-5.44774e-07	-5.4105e-07	-4.93332e-07	-4.60701e-07	-5.26636e-07	-5.20043e-07	-5.13455e-07	-5.09317e-07	-5.06622e-07	-5.06584e-07	-5.0847e-07	-4.99249e-07	-4.34967e-07	-5.03145e-07	-5.05064e-07	-5.04305e-07	-5.03328e-07	-5.03364e-07	-5.02595e-07	-5.02345e-07	-5.01554e-07	-4.39707e-07	-4.66277e-07	-4.98482e-07	-4.95742e-07
2.1	5.9	-2.64037e-09	-2.47992e-09	-3.10182e-09	-5.05395e-09	-2.66515e-08	-9.87415e-08	-1.33455e-07	-1.31407e-07	-1.45306e-07	-1.40029e-07	-1.45644e-07	-1.39055e-07	-1.49298e-07	-1.30178e-07	-1.4266e-07	-3.74683e-07	-4.67058e-07	-4.44712e-07	-5.27182e-07	-5.36724e-07	-5.40257e-07	-5.43674e-07	-5.43342e-07	-5.20301e-07	-5.31479e-07	-4.84197e-07	-4.50191e-07	-5.19862e-07	-5.14903e-07	-5.10298e-07	-5.08674e-07	-5.07268e-07	-5.074e-07	-5.06511e-07	-4.99644e-07	-4.35426e-07	-5.04088e-07	-5.04623e-07	-5.03462e-07	-5.03833e-07	-5.02745e-07	-5.02266e-07	-5.0135e-07	-5.00063e-07	-4.44789e-07	-4.64534e-07	-4.97117e-07	-4.89644e-07
2.2	5.8	-2.29375e-09	-2.68389e-09	-3.34332e-09	-1.19327e-08	-5.5462e-08	-1.15031e-07	-1.2462e-07	-1.32663e-07	-1.56199e-07	-1.487e-07	-1.50885e-07	-1.43844e-07	-1.4856e-07	-1.2599e-07	-1.40561e-07	-3.70816e-07	-4.73095e-07	-4.48899e-07	-5.25795e-07	-5.30989e-07	-5.34279e-07	-5.36936e-07	-5.3434e-07	-5.34211e-07	-5.30488e-07	-4.87651e-07	-4.47173e-07	-5.16194e-07	-5.12629e-07	-5.10442e-07	-5.10501e-07	-5.09119e-07	-5.07999e-07	-5.05105e-07	-4.98536e-07	-4.35101e-07	-5.02618e-07	-5.03881e-07	-5.02559e-07	-5.03515e-07	-5.03502e-07	-5.03126e-07	-5.01345e-07	-4.98774e-07	-4.47529e-07	-4.58872e-07	-5.00764e-07	-4.884e-07
2.3	5.7	-1.9843e-09	-2.86315e-09	-4.74174e-09	-2.41645e-08	-8.61456e-08	-1.21346e-07	-1.32466e-07	-1.54335e-07	-1.6621e-07	-1.52478e-07	-1.56009e-07	-1.52188e-07	-1.58003e-07	-1.37249e-07	-1.47256e-07	-3.57709e-07	-4.78019e-07	-4.48226e-07	-5.2246e-07	-5.24307e-07	-5.26601e-07	-5.25726e-07	-5.30631e-07	-5.26947e-07	-5.23796e-07	-4.86324e-07	-4.46386e-07	-5.15101e-07	-5.12895e-07	-5.11494e-07	-5.11609e-07	-5.10585e-07	-5.09421e-07	-5.0734e-07	-5.0335e-07	-4.3465e-07	-5.01102e-07	-5.05439e-07	-5.04422e-07	-5.0347e-07	-5.01888e-07	-5.03958e-07	-5.02625e-07	-5.02128e-07	-4.47533e-07	-4.5457e-07	-5.01765e-07	-4.99727e-07
2.4	5.6	-1.65634e-09	-3.07474e-09	-8.17995e-09	-4.29679e-08	-1.03053e-07	-1.15083e-07	-1.35505e-07	-1.5775e-07	-1.59846e-07	-1.48304e-07	-1.54735e-07	-1.51404e-07	-1.48554e-07	-1.2639e-07	-1.38353e-07	-3.58402e-07	-4.76492e-07	-4.45354e-07	-5.18146e-07	-5.18864e-07	-5.18439e-07	-5.1903e-07	-5.21461e-07	-5.20627e-07	-5.18938e-07	-4.86515e-07	-4.48395e-07	-5.13927e-07	-5.12818e-07	-5.11301e-07	-5.11781e-07	-5.10473e-07	-5.08828e-07	-5.0611e-07	-5.01691e-07	-4.33172e-07	-5.02229e-07	-4.83422e-07	-5.03538e-07	-5.04048e-07	-5.03839e-07	-5.02403e-07	-5.02509e-07	-5.02255e-07	-4.45934e-07	-4.47105e-07	-5.00196e-07	-4.97873e-07
2.5	5.5	-1.67917e-09	-3.29525e-09	-1.35806e-08	-7.13543e-08	-1.46849e-07	-1.44019e-07	-1.38135e-07	-1.57013e-07	-1.60811e-07	-1.4999e-07	-1.59762e-07	-1.60136e-07	-1.56969e-07	-1.36376e-07	-1.50175e-07	-3.43658e-07	-3.0303e-07	-3.5183e-07	-5.16773e-07	-5.17271e-07	-5.14449e-07	-5.18066e-07	-5.18838e-07	-5.17717e-07	-5.17372e-07	-4.89134e-07	-4.49464e-07	-5.14004e-07	-5.12706e-07	-5.11796e-07	-5.12735e-07	-5.11044e-07	-5.10562e-07	-5.09197e-07	-5.04568e-07	-4.30746e-07	-4.99663e-07	-5.05981e-07	-5.04188e-07	-5.03664e-07	-4.99579e-07	-5.01854e-07	-5.04195e-07	-5.02696e-07	-4.49268e-07	-4.4431e-07	-4.98447e-07	-4.97382e-07
2.6	5.4	-5.29868e-08	-3.65833e-09	-1.75726e-08	-8.02368e-08	-1.3688e-07	-1.37735e-07	-1.43399e-07	-1.45192e-07	-1.44136e-07	-1.4165e-07	-1.58477e-07	-1.57648e-07	-1.42774e-07	-1.235e-07	-1.60659e-07	-3.29597e-07	-4.85103e-07	-4.35445e-07	-5.15059e-07	-5.15815e-07	-5.16344e-07	-5.1752e-07	-5.17494e-07	-5.17682e-07	-5.17807e-07	-4.89206e-07	-4.49831e-07	-5.1359e-07	-5.12461e-07	-5.12392e-07	-5.1315e-07	-5.11553e-07	-5.11036e-07	-5.09825e-07	-5.06161e-07	-4.3482e-07	-4.91365e-07	-5.0551e-07	-5.03103e-07	-5.0459e-07	-5.00883e-07	-5.02336e-07	-5.0369e-07	-5.03316e-07	-4.53311e-07	-4.46467e-07	-4.9888e-07	-4.98113e-07
2.7	5.3	-6.39753e-08	-4.15867e-09	-2.00226e-08	-7.82857e-08	-1.15015e-07	-1.13161e-07	-1.16755e-07	-1.16323e-07	-1.22908e-07	-1.25273e-07	-1.40527e-07	-1.41376e-07	-1.41233e-07	-1.31324e-07	-1.56254e-07	-2.78441e-07	-4.86657e-07	-4.35668e-07	-5.14194e-07	-5.13513e-07	-5.13722e-07	-5.16042e-07	-5.19048e-07	-5.17056e-07	-5.16421e-07	-4.89916e-07	-4.46636e-07	-5.14268e-07	-5.13496e-07	-5.12425e-07	-5.12241e-07	-5.11012e-07	-5.11395e-07	-5.09219e-07	-5.00759e-07	-4.37745e-07	-4.94578e-07	-5.06013e-07	-5.04987e-07	-5.05757e-07	-5.04057e-07	-5.02858e-07	-5.02802e-07	-5.03241e-07	-4.50602e-07	-4.41935e-07	-4.99303e-07	-4.97655e-07
2.8	5.2	-5.29253e-08	-4.12313e-09	-1.90391e-08	-7.64207e-08	-1.18976e-07	-1.2133e-07	-1.12646e-07	-1.16535e-07	-1.22614e-07	-1.20123e-07	-1.25058e-07	-1.27267e-07	-1.28997e-07	-1.20252e-07	-1.37962e-07	-2.30879e-07	-4.84331e-07	-4.35095e-07	-5.13738e-07	-5.15385e-07	-5.15612e-07	-5.17125e-07	-5.1686e-07	-5.16497e-07	-5.17296e-07	-4.91564e-07	-4.47104e-07	-5.14258e-07	-5.13554e-07	-5.13065e-07	-5.13688e-07	-5.14354e-07	-5.11512e-07	-4.94431e-07	-5.07534e-07	-4.40034e-07	-4.94549e-07	-5.0642e-07	-5.06333e-07	-5.06164e-07	-5.05269e-07	-5.03675e-07	-5.043e-07	-5.02085e-07	-4.52934e-07	-4.45349e-07	-5.00921e-07	-5.00051e-07
2.9	5.1	-5.28501e-08	-3.60292e-09	-1.70065e-08	-7.62344e-08	-1.44495e-07	-1.52437e-07	-1.31191e-07	-1.12396e-07	-1.23523e-07	-1.26592e-07	-1.32003e-07	-1.39735e-07	-1.35159e-07	-1.29295e-07	-1.13247e-07	-2.5259e-07	-4.80494e-07	-4.3626e-07	-5.12221e-07	-5.14968e-07	-5.14842e-07	-5.15663e-07	-5.15053e-07	-5.14967e-07	-5.15143e-07	-4.94255e-07	-4.48046e-07	-5.13107e-07	-5.12359e-07	-5.12172e-07	-5.1293e-07	-5.12275e-07	-5.11199e-07	-5.09869e-07	-5.07505e-07	-4.43043e-07	-4.88707e-07	-5.06246e-07	-5.06018e-07	-5.06339e-07	-5.02621e-07	-5.02369e-07	-5.03181e-07	-5.03782e-07	-4.59648e-07	-4.44191e-07	-5.02571e-07	-5.01141e-07
3	5	-1.62593e-09	-3.22285e-09	-1.40293e-08	-7.1008e-08	-1.38664e-07	-1.44124e-07	-1.22059e-07	-1.06667e-07	-1.26775e-07	-1.32836e-07	-1.29422e-07	-1.36229e-07	-1.34708e-07	-1.37011e-07	-1.04442e-07	-2.68272e-07	-4.75811e-07	-4.34834e-07	-5.10589e-07	-5.13608e-07	-5.14632e-07	-5.15585e-07	-5.15561e-07	-5.15234e-07	-5.16051e-07	-4.9543e-07	-4.4451e-07	-5.12877e-07	-5.12621e-07	-5.12116e-07	-5.13052e-07	-5.12234e-07	-5.10861e-07	-5.1003e-07	-5.08233e-07	-4.44247e-07	-4.86165e-07	-5.06734e-07	-5.06587e-07	-5.06985e-07	-5.05727e-07	-5.05426e-07	-5.05282e-07	-5.04909e-07	-4.59995e-07	-4.44312e-07	-5.03364e-07	-5.01734e-07
3.1	4.9	-1.78948e-09	-3.33277e-09	-8.80951e-09	-4.94156e-08	-1.27957e-07	-1.42662e-07	-1.14495e-07	-1.03875e-07	-1.27068e-07	-1.37498e-07	-1.31555e-07	-1.32746e-07	-1.21786e-07	-1.21839e-07	-9.90416e-08	-2.60902e-07	-4.72991e-07	-4.38912e-07	-5.09428e-07	-5.13266e-07	-5.13726e-07	-5.1435e-07	-5.14731e-07	-5.14436e-07	-5.15606e-07	-4.97312e-07	-4.44821e-07	-5.12553e-07	-5.12672e-07	-5.1168e-07	-5.12708e-07	-5.12507e-07	-5.1136e-07	-5.09836e-07	-5.08324e-07	-4.4508e-07	-4.8733e-07	-5.08361e-07	-5.05966e-07	-5.0597e-07	-5.04582e-07	-5.05803e-07	-5.05482e-07	-5.05494e-07	-4.61965e-07	-4.48293e-07	-5.04339e-07	-5.02466e-07
3.2	4.8	-2.30274e-09	-3.21505e-09	-5.43262e-09	-3.07004e-08	-9.80448e-08	-1.14301e-07	-1.02302e-07	-9.90122e-08	-1.19978e-07	-1.32952e-07	-1.29224e-07	-1.27767e-07	-1.15941e-07	-1.20926e-07	-1.13124e-07	-2.13536e-07	-4.71376e-07	-4.34526e-07	-5.08829e-07	-5.12949e-07	-5.13087e-07	-5.14046e-07	-5.13905e-07	-5.13545e-07	-5.12738e-07	-4.98803e-07	-4.45877e-07	-5.11238e-07	-5.12145e-07	-5.10311e-07	-5.09327e-07	-5.11451e-07	-5.08978e-07	-5.07996e-07	-5.07522e-07	-4.47318e-07	-4.84193e-07	-5.07823e-07	-5.05965e-07	-5.07038e-07	-5.05836e-07	-5.04261e-07	-5.04731e-07	-5.04452e-07	-4.62246e-07	-4.43485e-07	-5.01251e-07	-5.04762e-07
3.3	4.7	-2.05542e-09	-2.93602e-09	-3.50643e-09	-1.52112e-08	-6.5456e-08	-1.09442e-07	-9.517e-08	-8.69045e-08	-1.09706e-07	-1.23434e-07	-1.24162e-07	-1.21921e-07	-1.09849e-07	-1.08993e-07	-1.12951e-07	-1.97814e-07	-4.64395e-07	-4.31021e-07	-5.05853e-07	-5.12772e-07	-5.12952e-07	-5.13953e-07	-5.136e-07	-5.13552e-07	-5.12959e-07	-4.95689e-07	-4.42913e-07	-5.07211e-07	-5.07424e-07	-5.08735e-07	-5.01992e-07	-5.08332e-07	-5.10628e-07	-5.11478e-07	-5.07911e-07	-4.46245e-07	-4.77868e-07	-5.08175e-07	-5.06484e-07	-5.06285e-07	-5.05603e-07	-5.03656e-07	-5.07216e-07	-5.04343e-07	-4.63266e-07	-4.41837e-07	-4.99195e-07	-5.00342e-07
3.4	4.6	-2.22606e-09	-2.91137e-09	-3.13491e-09	-6.3928e-09	-3.41335e-08	-8.87147e-08	-8.8577e-08	-8.27674e-08	-9.61513e-08	-1.14722e-07	-1.14748e-07	-1.12457e-07	-1.09307e-07	-1.12229e-07	-1.1198e-07	-1.72122e-07	-4.55959e-07	-4.30759e-07	-5.06872e-07	-5.12548e-07	-5.11919e-07	-5.14265e-07	-5.14673e-07	-5.1292e-07	-5.11602e-07	-4.95072e-07	-4.36885e-07	-5.07538e-07	-5.08686e-07	-5.08093e-07	-5.08289e-07	-5.10578e-07	-5.10105e-07	-5.0995e-07	-5.08173e-07	-4.49534e-07	-4.7281e-07	-5.07298e-07	-5.06088e-07	-5.06655e-07	-5.05575e-07	-5.04359e-07	-5.05032e-07	-5.0364e-07	-4.65068e-07	-4.41497e-07	-5.01309e-07	-5.01071e-07
3.5	4.5	-2.31038e-09	-2.65574e-09	-2.94154e-09	-3.47253e-09	-1.03325e-08	-3.46623e-08	-5.54181e-08	-6.36419e-08	-8.20652e-08	-1.03482e-07	-1.01009e-07	-8.59369e-08	-9.17866e-08	-9.58797e-08	-1.07423e-07	-1.62745e-07	-4.44559e-07	-4.29161e-07	-5.06011e-07	-5.11815e-07	-5.11965e-07	-5.12215e-07	-5.12404e-07	-5.12614e-07	-5.11782e-07	-5.01868e-07	-4.43767e-07	-5.0898e-07	-5.10991e-07	-5.10345e-07	-5.10313e-07	-5.10016e-07	-5.09729e-07	-5.10372e-07	-5.09188e-07	-4.52098e-07	-4.67939e-07	-5.05909e-07	-5.03889e-07	-5.07179e-07	-5.06676e-07	-5.0535e-07	-5.04882e-07	-5.0408e-07	-4.6753e-07	-4.42686e-07	-4.74692e-07	-5.00937e-07
3.6	4.4	-2.26674e-09	-2.68085e-09	-2.77363e-09	-3.23984e-09	-4.33463e-09	-1.269e-08	-3.34991e-08	-5.23405e-08	-7.38158e-08	-9.44322e-08	-9.91691e-08	-8.60399e-08	-9.08211e-08	-9.61644e-08	-1.02169e-07	-1.48041e-07	-4.33462e-07	-4.26602e-07	-5.0523e-07	-5.11911e-07	-5.11393e-07	-5.1275e-07	-5.11909e-07	-5.12312e-07	-5.12144e-07	-5.03404e-07	-4.43692e-07	-5.08551e-07	-5.11335e-07	-5.10099e-07	-5.09844e-07	-5.09667e-07	-4.52091e-07	-5.0982e-07	-5.0827e-07	-4.5389e-07	-4.66432e-07	-5.07123e-07	-5.05719e-07	-5.06451e-07	-5.05557e-07	-5.03425e-07	-5.04812e-07	-5.04916e-07	-4.68841e-07	-4.41314e-07	-5.02279e-07	-4.99531e-07
3.7	4.3	-1.98168e-09	-2.63348e-09	-2.83383e-09	-3.15397e-09	-3.53402e-09	-5.22557e-09	-1.33339e-08	-3.3119e-08	-5.22011e-08	-5.89545e-08	-8.22449e-08	-7.96007e-08	-8.24707e-08	-8.02142e-08	-9.11545e-08	-1.37543e-07	-4.12802e-07	-4.27856e-07	-5.04423e-07	-5.09486e-07	-5.03296e-07	-5.12484e-07	-5.09553e-07	-5.12158e-07	-5.12514e-07	-5.0474e-07	-4.44978e-07	-5.08528e-07	-5.11927e-07	-5.0962e-07	-5.08561e-07	-5.11059e-07	-5.11227e-07	-5.10216e-07	-5.06065e-07	-4.55181e-07	-4.61047e-07	-5.06173e-07	-5.05955e-07	-5.06648e-07	-5.06129e-07	-5.05298e-07	-5.04069e-07	-5.0465e-07	-4.68133e-07	-4.43889e-07	-5.02882e-07	-5.01615e-07
3.8	4.2	-2.35583e-09	-2.65702e-09	-2.85685e-09	-3.24008e-09	-3.14774e-09	-3.95862e-09	-4.96348e-09	-1.12384e-08	-2.52295e-08	-4.2531e-08	-6.79484e-08	-6.75148e-08	-6.43373e-08	-6.90288e-08	-8.20289e-08	-1.41277e-07	-3.97253e-07	-4.25725e-07	-5.0518e-07	-5.10775e-07	-5.11255e-07	-5.13126e-07	-5.13076e-07	-5.12844e-07	-5.12644e-07	-5.06063e-07	-4.43121e-07	-5.05378e-07	-5.12334e-07	-5.11478e-07	-5.13501e-07	-5.13211e-07	-5.1154e-07	-5.10545e-07	-5.09013e-07	-4.57703e-07	-4.59823e-07	-5.08786e-07	-5.06903e-07	-5.05291e-07	-5.06336e-07	-5.06145e-07	-5.04664e-07	-5.06107e-07	-4.68871e-07	-4.40835e-07	-5.04074e-07	-5.03279e-07
3.9	4.1	-2.38495e-09	-2.76204e-09	-3.44149e-09	-3.58283e-09	-3.42596e-09	-3.61429e-09	-4.25553e-09	-5.19942e-09	-8.56401e-09	-1.89227e-08	-3.87191e-08	-5.11177e-08	-5.74951e-08	-5.99347e-08	-7.83031e-08	-1.43559e-07	-3.8665e-07	-4.20858e-07	-5.04733e-07	-5.09982e-07	-5.09016e-07	-5.11959e-07	-5.11896e-07	-5.11009e-07	-5.11434e-07	-5.04444e-07	-4.416e-07	-5.01651e-07	-5.11e-07	-5.1063e-07	-5.11536e-07	-5.11293e-07	-5.10569e-07	-5.10249e-07	-5.08583e-07	-4.5729e-07	-4.56929e-07	-5.07209e-07	-5.05775e-07	-5.06336e-07	-5.06926e-07	-5.06082e-07	-5.06663e-07	-5.05095e-07	-4.71676e-07	-4.4276e-07	-5.03331e-07	-5.02376e-07
4	4	-2.37348e-09	-2.62972e-09	-3.01516e-09	-4.34904e-09	-3.84417e-09	-3.78349e-09	-4.33837e-09	-4.47266e-09	-4.84107e-09	-6.40649e-09	-1.06378e-08	-1.91352e-08	-3.12182e-08	-4.55473e-08	-7.62602e-08	-1.66411e-07	-3.71341e-07	-4.24291e-07	-5.04933e-07	-5.07201e-07	-2.81825e-07	-5.11737e-07	-5.11221e-07	-5.08857e-07	-5.11468e-07	-5.04866e-07	-4.43115e-07	-5.02293e-07	-5.11973e-07	-5.11361e-07	-5.12199e-07	-5.11997e-07	-5.11668e-07	-5.10879e-07	-5.07389e-07	-4.56025e-07	-4.55534e-07	-5.0656e-07	-5.04718e-07	-5.06558e-07	-5.07198e-07	-5.06914e-07	-5.06377e-07	-5.06114e-07	-4.74145e-07	-4.4773e-07	-5.03796e-07	-5.01481e-07
4.1	3.9	-2.38344e-09	-2.70087e-09	-2.86686e-09	-3.42589e-09	-3.52951e-09	-3.77496e-09	-3.97958e-09	-4.09579e-09	-4.58075e-09	-6.55602e-09	-1.37935e-08	-3.17476e-08	-5.74317e-08	-7.84328e-08	-9.92974e-08	-1.55504e-07	-3.44693e-07	-4.22662e-07	-5.02769e-07	-5.09962e-07	-5.10867e-07	-5.12496e-07	-5.12326e-07	-5.07924e-07	-5.1235e-07	-5.07339e-07	-4.44334e-07	-5.01976e-07	-5.12003e-07	-5.11056e-07	-5.11689e-07	-5.11815e-07	-5.11773e-07	-5.10748e-07	-5.09003e-07	-4.6044e-07	-4.52787e-07	-5.07605e-07	-5.05836e-07	-5.06134e-07	-5.07197e-07	-5.07339e-07	-5.06542e-07	-5.06206e-07	-4.74545e-07	-4.42177e-07	-5.04136e-07	-5.02208e-07
4.2	3.8	-2.697e-09	-2.76117e-09	-2.70367e-09	-3.03876e-09	-3.34101e-09	-3.65437e-09	-3.90563e-09	-4.47392e-09	-7.79961e-09	-2.07572e-08	-4.3382e-08	-6.69774e-08	-8.33364e-08	-9.43345e-08	-1.07133e-07	-1.43198e-07	-3.26047e-07	-4.09519e-07	-5.02563e-07	-5.10326e-07	-5.11757e-07	-5.12617e-07	-5.1281e-07	-5.12551e-07	-5.11056e-07	-5.08611e-07	-4.45934e-07	-4.98387e-07	-5.11525e-07	-5.10921e-07	-5.11675e-07	-5.11902e-07	-5.11688e-07	-5.11005e-07	-5.09921e-07	-4.61452e-07	-4.49673e-07	-5.08101e-07	-5.06072e-07	-5.06493e-07	-5.07115e-07	-5.0704e-07	-5.0665e-07	-5.05526e-07	-4.74303e-07	-4.40639e-07	-5.04708e-07	-5.02908e-07
4.3	3.7	-2.56422e-09	-2.72533e-09	-3.00809e-09	-3.15581e-09	-3.14977e-09	-3.61005e-09	-4.15709e-09	-8.43512e-09	-2.99312e-08	-6.51304e-08	-7.76188e-08	-9.12567e-08	-1.08118e-07	-1.14087e-07	-1.19341e-07	-1.2983e-07	-3.1277e-07	-3.9866e-07	-5.01845e-07	-5.10442e-07	-5.11452e-07	-5.11621e-07	-5.12481e-07	-5.12713e-07	-5.12609e-07	-5.09308e-07	-4.46474e-07	-4.93738e-07	-5.10614e-07	-5.04604e-07	-5.10424e-07	-5.11495e-07	-5.11154e-07	-5.10973e-07	-5.09068e-07	-4.56641e-07	-4.41096e-07	-5.07769e-07	-5.0628e-07	-5.07967e-07	-5.07345e-07	-5.06928e-07	-5.06557e-07	-5.0562e-07	-4.77192e-07	-4.39363e-07	-5.03829e-07	-5.04331e-07
4.4	3.6	-2.21484e-09	-2.60426e-09	-2.95317e-09	-3.2813e-09	-3.33081e-09	-3.70077e-09	-6.00847e-09	-2.28399e-08	-6.31551e-08	-7.3619e-08	-7.67404e-08	-9.56194e-08	-1.1658e-07	-1.16232e-07	-1.21395e-07	-1.38118e-07	-3.04389e-07	-3.96579e-07	-5.00617e-07	-5.102e-07	-5.11833e-07	-5.1299e-07	-5.12827e-07	-5.12497e-07	-5.12834e-07	-5.09922e-07	-4.49133e-07	-4.92177e-07	-5.12402e-07	-5.09294e-07	-5.11697e-07	-5.11773e-07	-5.11906e-07	-5.11666e-07	-5.00571e-07	-4.11076e-07	-3.83566e-07	-4.97861e-07	-5.06398e-07	-5.05645e-07	-5.0842e-07	-5.0777e-07	-5.07491e-07	-4.99752e-07	-4.7604e-07	-4.3938e-07	-5.04609e-07	-5.03972e-07
4.5	3.5	-2.40202e-09	-2.59675e-09	-2.78978e-09	-3.0941e-09	-3.34779e-09	-5.45274e-09	-1.87514e-08	-5.69414e-08	-8.79079e-08	-8.83801e-08	-8.91584e-08	-9.84977e-08	-1.15745e-07	-1.25337e-07	-1.32186e-07	-1.30606e-07	-3.00204e-07	-3.98877e-07	-4.99275e-07	-5.10523e-07	-5.11423e-07	-5.12627e-07	-5.12497e-07	-5.11218e-07	-5.1178e-07	-5.08332e-07	-4.49174e-07	-4.87305e-07	-5.12852e-07	-5.11299e-07	-5.1189e-07	-5.11164e-07	-5.10659e-07	-5.10947e-07	-4.99883e-07	-4.16584e-07	-3.95031e-07	-4.97556e-07	-5.0765e-07	-5.07938e-07	-5.08514e-07	-5.07341e-07	-5.07884e-07	-5.01737e-07	-4.78963e-07	-4.48101e-07	-5.04913e-07	-5.03213e-07
4.6	3.4	-2.39393e-09	-2.76248e-09	-2.6635e-09	-2.91702e-09	-3.67284e-09	-1.19265e-08	-4.28073e-08	-7.54908e-08	-7.86575e-08	-7.14222e-08	-7.32249e-08	-9.49414e-08	-1.22987e-07	-1.26241e-07	-1.34194e-07	-1.41303e-07	-2.93079e-07	-4.0925e-07	-4.95997e-07	-5.10608e-07	-5.11486e-07	-5.12691e-07	-5.12712e-07	-5.12052e-07	-5.12223e-07	-5.09618e-07	-4.51024e-07	-4.83182e-07	-5.12801e-07	-5.11234e-07	-5.06109e-07	-4.83586e-07	-4.69384e-07	-5.02088e-07	-5.06962e-07	-4.57012e-07	-4.4172e-07	-5.07711e-07	-5.07828e-07	-5.0864e-07	-5.08365e-07	-5.08143e-07	-5.08267e-07	-5.07421e-07	-4.82805e-07	-4.38947e-07	-5.07222e-07	-5.04697e-07
4.7	3.3	-2.32474e-09	-2.47216e-09	-2.67409e-09	-3.0167e-09	-5.88114e-09	-3.35435e-08	-9.29715e-08	-9.04896e-08	-8.66384e-08	-8.71907e-08	-8.43991e-08	-9.89036e-08	-1.245e-07	-1.34836e-07	-1.41497e-07	-1.36648e-07	-3.0243e-07	-4.17011e-07	-4.93137e-07	-5.10137e-07	-5.1191e-07	-5.12852e-07	-5.13478e-07	-5.13387e-07	-5.13512e-07	-5.11385e-07	-4.53901e-07	-4.7994e-07	-5.12886e-07	-5.11419e-07	-4.99415e-07	-4.40006e-07	-4.13829e-07	-4.92061e-07	-5.09868e-07	-4.69846e-07	-4.48599e-07	-5.12142e-07	-5.08958e-07	-5.0875e-07	-5.08429e-07	-5.07824e-07	-5.07765e-07	-5.07364e-07	-4.84696e-07	-4.35673e-07	-5.04154e-07	-5.04305e-07
4.8	3.2	-2.23484e-09	-2.67063e-09	-2.86544e-09	-3.23987e-09	-1.09007e-08	-5.47943e-08	-1.08274e-07	-1.14687e-07	-1.10582e-07	-9.77073e-08	-9.15561e-08	-1.01403e-07	-1.28874e-07	-1.38692e-07	-1.50242e-07	-1.63383e-07	-2.84914e-07	-4.23367e-07	-4.88049e-07	-5.10757e-07	-5.11889e-07	-5.13601e-07	-5.13488e-07	-5.14005e-07	-5.13723e-07	-5.12064e-07	-4.55518e-07	-4.74428e-07	-5.12537e-07	-5.08943e-07	-5.10868e-07	-4.96056e-07	-4.90462e-07	-5.06461e-07	-5.09209e-07	-4.71405e-07	-4.479e-07	-5.10236e-07	-5.09061e-07	-5.0831e-07	-5.08541e-07	-5.08055e-07	-5.07472e-07	-5.06715e-07	-4.86947e-07	-4.39071e-07	-5.04289e-07	-5.03661e-07
4.9	3.1	-1.97628e-09	-2.61263e-09	-3.02904e-09	-3.82013e-09	-1.60275e-08	-6.18545e-08	-8.97913e-08	-1.02026e-07	-1.01489e-07	-9.90279e-08	-1.18703e-07	-1.10748e-07	-1.18912e-07	-1.33597e-07	-1.45968e-07	-1.75083e-07	-2.91739e-07	-4.32453e-07	-4.85568e-07	-5.11945e-07	-5.12827e-07	-5.17362e-07	-5.13622e-07	-5.1401e-07	-5.14221e-07	-5.13105e-07	-4.59244e-07	-4.71883e-07	-5.13619e-07	-5.12511e-07	-5.13515e-07	-5.13029e-07	-5.12517e-07	-5.12281e-07	-5.11854e-07	-4.7269e-07	-4.46001e-07	-5.10831e-07	-5.04578e-07	-5.09126e-07	-5.09101e-07	-5.08305e-07	-5.07172e-07	-5.06926e-07	-4.89618e-07	-4.39535e-07	-5.04404e-07	-5.04934e-07
5	3	-1.81294e-09	-2.44244e-09	-2.84743e-09	-4.25124e-09	-2.18953e-08	-7.77088e-08	-9.20151e-08	-9.39562e-08	-9.41836e-08	-1.12746e-07	-1.38043e-07	-1.25904e-07	-1.38218e-07	-1.36259e-07	-1.26231e-07	-1.91104e-07	-3.19654e-07	-4.38438e-07	-4.82262e-07	-5.11562e-07	-5.12524e-07	-5.13881e-07	-5.10712e-07	-5.13643e-07	-5.142e-07	-5.1325e-07	-4.59286e-07	-4.6715e-07	-5.13642e-07	-5.12467e-07	-5.13442e-07	-5.13334e-07	-5.13269e-07	-5.12663e-07	-5.11919e-07	-4.73893e-07	-4.31969e-07	-5.09941e-07	-5.08862e-07	-5.08685e-07	-5.08733e-07	-5.07315e-07	-5.06349e-07	-5.06799e-07	-4.90215e-07	-4.37712e-07	-5.0383e-07	-5.0419e-07
5.1	2.9	-1.69299e-09	-2.14578e-09	-2.60043e-09	-5.05171e-09	-3.14769e-08	-1.02097e-07	-1.13655e-07	-9.77874e-08	-1.04791e-07	-1.40651e-07	-1.58602e-07	-1.45718e-07	-1.41019e-07	-1.33435e-07	-1.14002e-07	-2.08264e-07	-3.0005e-07	-4.46731e-07	-4.76265e-07	-5.10153e-07	-5.12356e-07	-5.14833e-07	-5.13602e-07	-5.13686e-07	-5.14099e-07	-5.12924e-07	-4.60235e-07	-3.83412e-07	-5.14191e-07	-5.13732e-07	-5.10883e-07	-5.13167e-07	-5.12828e-07	-5.11904e-07	-5.10298e-07	-4.75328e-07	-4.43541e-07	-5.10129e-07	-5.08923e-07	-5.07486e-07	-5.06864e-07	-5.0673e-07	-5.06508e-07	-5.06906e-07	-4.92002e-07	-4.37639e-07	-5.01079e-07	-5.04234e-07
5.2	2.8	-1.68296e-09	-2.29187e-09	-2.64428e-09	-5.41065e-09	-3.80002e-08	-1.12401e-07	-1.12975e-07	-1.01828e-07	-1.13986e-07	-1.46138e-07	-1.61329e-07	-1.48336e-07	-1.42605e-07	-1.42808e-07	-1.51711e-07	-1.9078e-07	-2.54129e-07	-4.37927e-07	-4.67058e-07	-5.09884e-07	-5.11485e-07	-5.12911e-07	-5.12346e-07	-5.13605e-07	-5.13639e-07	-5.12622e-07	-4.61291e-07	-4.61134e-07	-5.12788e-07	-5.10851e-07	-5.12638e-07	-5.12672e-07	-5.12518e-07	-5.11448e-07	-5.11558e-07	-4.74555e-07	-4.46091e-07	-5.09967e-07	-5.08689e-07	-5.07374e-07	-5.06778e-07	-5.06517e-07	-5.06852e-07	-5.07078e-07	-4.93821e-07	-4.39306e-07	-5.01979e-07	-5.03422e-07
5.3	2.7	-2.08177e-09	-2.36219e-09	-2.47675e-09	-5.16845e-09	-3.77705e-08	-1.16204e-07	-1.17684e-07	-1.05656e-07	-1.29319e-07	-1.50949e-07	-1.53018e-07	-1.42285e-07	-1.24937e-07	-1.29258e-07	-1.47022e-07	-1.86674e-07	-2.58629e-07	-4.33932e-07	-4.56992e-07	-5.10095e-07	-5.09301e-07	-5.10565e-07	-5.12461e-07	-5.12831e-07	-5.13412e-07	-5.11165e-07	-4.62187e-07	-4.59162e-07	-5.12496e-07	-5.11105e-07	-5.1225e-07	-5.12652e-07	-5.12508e-07	-5.12331e-07	-5.11683e-07	-4.75775e-07	-4.4521e-07	-5.09699e-07	-5.09934e-07	-5.06972e-07	-5.07167e-07	-5.0691e-07	-5.07611e-07	-5.07496e-07	-4.95652e-07	-4.39941e-07	-5.01916e-07	-5.03905e-07
5.4	2.6	-2.19148e-09	-2.50163e-09	-2.43843e-09	-4.17724e-09	-3.06374e-08	-1.12244e-07	-1.42145e-07	-1.29425e-07	-1.18744e-07	-1.32049e-07	-1.50166e-07	-1.40851e-07	-1.29435e-07	-1.3511e-07	-1.534e-07	-1.73142e-07	-2.73192e-07	-4.31483e-07	-4.52272e-07	-5.06454e-07	-5.10299e-07	-5.12225e-07	-5.10943e-07	-5.1266e-07	-5.12924e-07	-5.12914e-07	-4.63182e-07	-4.5586e-07	-5.12751e-07	-5.12211e-07	-5.12938e-07	-5.12938e-07	-5.13054e-07	-5.13354e-07	-5.11875e-07	-4.77845e-07	-4.48077e-07	-5.10376e-07	-5.09251e-07	-5.07848e-07	-5.08041e-07	-5.07526e-07	-5.07496e-07	-5.07689e-07	-4.97246e-07	-4.38457e-07	-5.00762e-07	-5.00858e-07
5.5	2.5	-1.95414e-09	-2.57933e-09	-2.73901e-09	-3.69518e-09	-2.21674e-08	-9.86335e-08	-1.36189e-07	-1.2393e-07	-1.15775e-07	-1.35502e-07	-1.50771e-07	-1.44418e-07	-1.23406e-07	-1.26824e-07	-1.49075e-07	-1.72528e-07	-2.57479e-07	-4.24337e-07	-4.43191e-07	-4.99419e-07	-5.06135e-07	-5.09693e-07	-5.0878e-07	-5.10984e-07	-5.11276e-07	-5.12082e-07	-4.63356e-07	-4.53231e-07	-5.12621e-07	-5.11409e-07	-5.12596e-07	-5.12783e-07	-5.12506e-07	-5.11997e-07	-5.11522e-07	-4.77618e-07	-4.45433e-07	-5.09298e-07	-5.08965e-07	-5.07955e-07	-5.07933e-07	-5.06971e-07	-5.07181e-07	-5.06981e-07	-4.97321e-07	-4.36624e-07	-4.97383e-07	-5.04508e-07
5.6	2.4	-1.85146e-09	-2.45685e-09	-2.75696e-09	-3.36999e-09	-1.29171e-08	-6.838e-08	-1.2686e-07	-1.28238e-07	-1.20611e-07	-1.26346e-07	-1.46932e-07	-1.45382e-07	-1.3337e-07	-1.37541e-07	-1.53518e-07	-1.67935e-07	-2.3987e-07	-4.08359e-07	-4.25783e-07	-4.97173e-07	-4.76269e-07	-5.07456e-07	-5.10285e-07	-5.08179e-07	-5.1139e-07	-5.10346e-07	-4.65981e-07	-4.53416e-07	-5.1283e-07	-5.10698e-07	-5.13189e-07	-5.14942e-07	-5.13039e-07	-5.12755e-07	-5.11808e-07	-4.79076e-07	-4.47202e-07	-5.09768e-07	-5.10038e-07	-5.0908e-07	-5.092e-07	-5.08367e-07	-5.09871e-07	-5.06777e-07	-4.99397e-07	-4.38493e-07	-4.9777e-07	-5.05079e-07
5.7	2.3	-1.76103e-09	-2.19723e-09	-2.53659e-09	-3.26968e-09	-6.08e-09	-3.61136e-08	-9.14645e-08	-1.05213e-07	-1.1021e-07	-1.31184e-07	-1.50698e-07	-1.48472e-07	-1.27549e-07	-1.22574e-07	-1.4306e-07	-1.65132e-07	-2.05574e-07	-3.17783e-07	-3.72121e-07	-5.00541e-07	-4.98205e-07	-4.47228e-07	-5.06078e-07	-5.11427e-07	-5.11357e-07	-5.0892e-07	-4.66484e-07	-4.56345e-07	-5.11972e-07	-5.09945e-07	-5.10627e-07	-5.12678e-07	-5.122e-07	-5.11832e-07	-5.11622e-07	-4.77993e-07	-4.47912e-07	-5.08908e-07	-5.09521e-07	-5.08165e-07	-5.09307e-07	-5.08047e-07	-5.07543e-07	-5.06729e-07	-5.00511e-07	-4.40523e-07	-4.9569e-07	-5.04929e-07
5.8	2.2	-1.78229e-09	-2.12397e-09	-2.40119e-09	-3.01695e-09	-3.75523e-09	-1.59452e-08	-5.72135e-08	-9.45152e-08	-1.1108e-07	-1.31751e-07	-1.38611e-07	-1.30187e-07	-1.14681e-07	-1.09619e-07	-1.28756e-07	-1.58649e-07	-1.93101e-07	-3.02039e-07	-4.1415e-07	-4.81233e-07	-5.05017e-07	-4.79296e-07	-5.09414e-07	-5.11699e-07	-5.11873e-07	-5.11085e-07	-4.69398e-07	-4.53032e-07	-5.12127e-07	-5.10301e-07	-5.09346e-07	-5.11368e-07	-5.1091e-07	-5.09198e-07	-5.09991e-07	-4.82728e-07	-4.48438e-07	-5.08355e-07	-5.0763e-07	-5.06714e-07	-5.07076e-07	-5.05434e-07	-5.03429e-07	-5.05099e-07	-4.99322e-07	-4.40921e-07	-4.91012e-07	-5.02603e-07
5.9	2.1	-1.61652e-09	-2.19513e-09	-2.42297e-09	-3.01707e-09	-3.32671e-09	-5.78188e-09	-2.63297e-08	-7.78437e-08	-1.0715e-07	-1.33126e-07	-1.46291e-07	-1.40649e-07	-1.10656e-07	-1.02567e-07	-1.13724e-07	-1.52823e-07	-1.90082e-07	-2.84187e-07	-4.01345e-07	-5.00358e-07	-4.76609e-07	-5.03732e-07	-4.99968e-07	-5.04108e-07	-5.03911e-07	-5.03994e-07	-4.66461e-07	-4.45188e-07	-5.0323e-07	-5.04158e-07	-5.03994e-07	-5.04159e-07	-5.03466e-07	-5.03289e-07	-5.02914e-07	-4.7545e-07	-4.3604e-07	-4.98518e-07	-4.97391e-07	-4.95961e-07	-4.95603e-07	-4.88536e-07	-4.86113e-07	-4.90582e-07	-4.83446e-07	-4.32768e-07	-4.74614e-07	-4.86634e-07
6	2	-1.53807e-09	-2.08887e-09	-2.32908e-09	-2.74251e-09	-2.92243e-09	-3.17745e-09	-9.52805e-09	-4.02886e-08	-9.70908e-08	-1.21909e-07	-1.29191e-07	-1.3566e-07	-1.26645e-07	-1.31433e-07	-1.20853e-07	-1.45441e-07	-1.83814e-07	-2.69425e-07	-3.33668e-07	-4.07314e-07	-4.05971e-07	-4.02536e-07	-3.95671e-07	-3.85454e-07	-3.77048e-07	-3.74984e-07	-3.45579e-07	-3.27573e-07	-3.5572e-07	-3.47986e-07	-3.512e-07	-3.47233e-07	-3.4366e-07	-3.39048e-07	-3.38529e-07	-3.09979e-07	-2.76771e-07	-3.04464e-07	-2.99642e-07	-2.91488e-07	-2.83558e-07	-2.81684e-07	-2.78999e-07	-2.75818e-07	-2.78277e-07	-2.47446e-07	-2.63079e-07	-2.64204e-07
6.1	1.9	-1.82586e-09	-2.30641e-09	-2.47331e-09	-2.56291e-09	-2.74227e-09	-2.93715e-09	-3.5784e-09	-1.5068e-08	-5.99153e-08	-9.91041e-08	-1.11538e-07	-1.21816e-07	-1.24894e-07	-1.27183e-07	-1.13852e-07	-1.3339e-07	-1.82959e-07	-2.5854e-07	-3.20443e-07	-3.25046e-07	-3.54602e-07	-3.58593e-07	-3.59672e-07	-3.69633e-07	-3.35197e-07	-3.85492e-07	-3.84943e-07	-3.88531e-07	-3.93518e-07	-3.98756e-07	-3.97267e-07	-3.97404e-07	-4.09338e-07	-4.1127e-07	-4.17504e-07	-4.22701e-07	-4.25491e-07	-4.33579e-07	-4.39805e-07	-4.3998e-07	-4.47375e-07	-4.50108e-07	-4.50873e-07	-4.53053e-07	-4.55551e-07	-4.57881e-07	-4.61486e-07	-4.62692e-07
6.2	1.8	-1.64139e-09	-2.17373e-09	-2.3829e-09	-2.25811e-09	-2.47684e-09	-2.74566e-09	-2.96361e-09	-4.10051e-09	-1.65055e-08	-4.85006e-08	-8.87378e-08	-1.13515e-07	-1.1955e-07	-1.17998e-07	-1.1251e-07	-1.281e-07	-1.65875e-07	-2.49076e-07	-4.14792e-07	-4.7142e-07	-4.85439e-07	-4.90447e-07	-4.89175e-07	-4.88732e-07	-4.88298e-07	-4.86093e-07	-4.83678e-07	-4.73222e-07	-4.82275e-07	-4.83479e-07	-4.84515e-07	-4.83148e-07	-4.79855e-07	-4.75167e-07	-4.7602e-07	-4.74145e-07	-4.71116e-07	-4.67065e-07	-4.60753e-07	-4.53866e-07	-4.46915e-07	-4.41978e-07	-4.33065e-07	-4.28141e-07	-4.1834e-07	-4.0661e-07	-3.96819e-07	-3.80434e-07
6.3	1.7	-1.34089e-09	-2.2885e-09	-2.68363e-09	-2.65972e-09	-2.65863e-09	-2.60151e-09	-2.79099e-09	-3.25394e-09	-4.22594e-09	-1.10761e-08	-3.33018e-08	-7.30466e-08	-1.03255e-07	-1.10434e-07	-1.12706e-07	-1.19598e-07	-1.42886e-07	-1.68605e-07	-2.1075e-07	-2.21818e-07	-2.24389e-07	-2.19757e-07	-2.09707e-07	-1.97123e-07	-1.86554e-07	-1.61015e-07	-1.44709e-07	-1.3494e-07	-1.3281e-07	-1.2925e-07	-1.19754e-07	-1.16294e-07	-1.16141e-07	-9.98909e-08	-9.38518e-08	-8.74834e-08	-8.53417e-08	-8.2458e-08	-7.91617e-08	-7.57406e-08	-7.42076e-08	-7.29866e-08	-7.14083e-08	-5.68105e-08	-6.08593e-08	-5.88433e-08	-6.47689e-08	-6.38632e-08
6.4	1.6	-1.37224e-09	-2.15731e-09	-2.6293e-09	-2.81088e-09	-2.6654e-09	-2.61327e-09	-2.7865e-09	-3.21326e-09	-3.83513e-09	-4.43757e-09	-7.28863e-09	-1.75437e-08	-3.67436e-08	-6.23198e-08	-8.26478e-08	-9.61055e-08	-9.88868e-08	-9.45383e-08	-5.31998e-08	-3.41734e-08	-3.75841e-08	-4.16351e-08	-4.24491e-08	-4.4486e-08	-5.09633e-08	-5.83946e-08	-6.58426e-08	-7.26474e-08	-7.0811e-08	-6.6087e-08	-6.47721e-08	-6.97159e-08	-7.41376e-08	-8.07135e-08	-7.58421e-08	-7.14072e-08	-6.52756e-08	-5.98194e-08	-5.53218e-08	-5.29625e-08	-5.72343e-08	-6.02939e-08	-5.75341e-08	-5.38082e-08	-5.41254e-08	-6.28438e-08	-5.15207e-08	-4.13467e-08
6.5	1.5	-1.33758e-09	-1.7299e-09	-2.86513e-09	-2.79363e-09	-2.70799e-09	-2.65433e-09	-2.68857e-09	-3.02051e-09	-4.06223e-09	-5.64846e-09	-5.00366e-09	-4.65246e-09	-7.30828e-09	-1.41013e-08	-2.2712e-08	-3.19972e-08	-3.61341e-08	-3.92874e-08	-4.5832e-08	-6.04181e-08	-5.7162e-08	-5.28809e-08	-5.2639e-08	-5.52313e-08	-6.16159e-08	-6.74464e-08	-7.23036e-08	-7.70652e-08	-8.09299e-08	-8.78922e-08	-8.68152e-08	-9.446e-08	-9.01647e-08	-8.4405e-08	-7.97957e-08	-7.43925e-08	-7.25574e-08	-6.77579e-08	-6.03397e-08	-5.34401e-08	-6.30831e-08	-7.07183e-08	-5.66626e-08	-4.82008e-08	-5.14546e-08	-5.76144e-08	-5.1993e-08	-4.57831e-08
6.6	1.4	-1.32749e-09	-1.53723e-09	-1.71434e-09	-1.97484e-09	-2.28774e-09	-7.04944e-09	-2.4219e-09	-2.91647e-09	-4.19815e-09	-6.65473e-09	-5.1029e-09	-4.08295e-09	-4.06679e-09	-4.56048e-09	-5.17374e-09	-6.54563e-09	-8.24579e-09	-1.46343e-08	-4.47292e-08	-8.05499e-08	-7.47416e-08	-5.6721e-08	-5.97134e-08	-7.40221e-08	-7.06138e-08	-7.22132e-08	-8.05362e-08	-8.73898e-08	-9.56715e-08	-1.02851e-07	-1.13612e-07	-1.27547e-07	-1.19834e-07	-1.18385e-07	-1.11149e-07	-1.02111e-07	-9.12398e-08	-8.21815e-08	-7.26133e-08	-5.59046e-08	-6.04621e-08	-8.30353e-08	-6.00894e-08	-4.30769e-08	-4.43165e-08	-5.33875e-08	-4.76643e-08	-4.45455e-08
6.7	1.3	-1.39882e-09	-1.60122e-09	-1.56086e-09	-1.67315e-09	-1.79962e-09	-1.87728e-09	-2.13023e-09	-2.59063e-09	-3.15714e-09	-3.71281e-09	-3.83406e-09	-3.57526e-09	-3.64417e-09	-3.60503e-09	-3.73337e-09	-4.01348e-09	-4.93778e-09	-9.57991e-09	-3.58472e-08	-8.24704e-08	-7.84104e-08	-6.28138e-08	-6.5636e-08	-7.78026e-08	-7.71269e-08	-7.72542e-08	-8.45868e-08	-8.77839e-08	-8.80395e-08	-7.98801e-08	-1.02125e-07	-1.30135e-07	-1.23448e-07	-1.05702e-07	-9.94107e-08	-9.01693e-08	-8.42345e-08	-7.37822e-08	-7.82467e-08	-7.94591e-08	-7.76756e-08	-9.0777e-08	-5.40668e-08	-2.77334e-08	-3.90655e-08	-4.89187e-08	-5.18146e-08	-4.64865e-08
6.8	1.2	-1.48324e-09	-1.46966e-09	-1.61353e-09	-1.66091e-09	-1.84365e-09	-1.62238e-09	-1.66271e-09	-1.96359e-09	-2.32582e-09	-2.56779e-09	-2.89552e-09	-3.06192e-09	-3.20364e-09	-3.43013e-09	-2.95194e-09	-3.50217e-09	-3.91832e-09	-5.49355e-09	-2.57882e-08	-8.26394e-08	-9.72091e-08	-8.00351e-08	-8.31271e-08	-1.06119e-07	-9.86651e-08	-8.93459e-08	-9.4865e-08	-9.76968e-08	-9.46077e-08	-8.67729e-08	-9.50263e-08	-1.155e-07	-1.20269e-07	-1.17875e-07	-1.10673e-07	-1.04417e-07	-9.43804e-08	-9.73103e-08	-9.59761e-08	-9.17947e-08	-8.71474e-08	-8.28712e-08	-3.61435e-08	-1.47275e-08	-2.43348e-08	-3.93852e-08	-5.78044e-08	-3.87447e-08
6.9	1.1	-3.98167e-09	-1.28259e-09	-1.55154e-09	-1.76748e-09	-1.67446e-09	-1.73432e-09	-1.66478e-09	-1.63067e-09	-1.70653e-09	-1.87496e-09	-2.14477e-09	-2.35715e-09	-2.53107e-09	-2.61301e-09	-2.86696e-09	-3.10329e-09	-3.61137e-09	-3.76414e-09	-1.35073e-08	-5.79592e-08	-9.52384e-08	-1.002e-07	-9.88416e-08	-1.07425e-07	-1.09686e-07	-1.01883e-07	-1.06596e-07	-1.13966e-07	-1.15023e-07	-1.15328e-07	-1.12285e-07	-1.1478e-07	-1.26819e-07	-1.40923e-07	-1.33374e-07	-1.23026e-07	-1.09195e-07	-9.6488e-08	-9.26975e-08	-9.1087e-08	-7.56088e-08	-4.67461e-08	-1.54294e-08	-8.43226e-09	-1.75877e-08	-4.3738e-08	-6.4792e-08	-4.15755e-08
7	1	-1.52476e-09	-1.63494e-09	-1.54078e-09	-5.06386e-09	-1.47063e-09	-1.65197e-09	-1.65717e-09	-1.62292e-09	-1.64587e-09	-1.81143e-09	-2.0143e-09	-2.06556e-09	-2.52582e-09	-2.39075e-09	-2.63095e-09	-2.79513e-09	-3.02256e-09	-3.22185e-09	-5.5753e-09	-2.91461e-08	-8.53881e-08	-1.19289e-07	-1.17088e-07	-1.13667e-07	-1.22826e-07	-1.02328e-07	-1.0438e-07	-1.16603e-07	-1.23724e-07	-1.33793e-07	-1.33458e-07	-1.34861e-07	-1.34593e-07	-1.29436e-07	-1.23115e-07	-1.17325e-07	-1.09097e-07	-8.3921e-08	-7.68089e-08	-8.17866e-08	-5.77203e-08	-2.25426e-08	-7.97706e-09	-5.60741e-09	-9.79984e-09	-3.11812e-08	-5.56076e-08	-4.33215e-08
7.1	0.9	-1.47031e-09	-1.57333e-09	-1.46852e-09	-1.45241e-09	-1.50621e-09	-1.58781e-09	-1.55723e-09	-1.69159e-09	-1.8109e-09	-1.81369e-09	-1.81308e-09	-1.8464e-09	-2.00621e-09	-2.2397e-09	-2.32893e-09	-2.66925e-09	-2.67884e-09	-2.86929e-09	-3.48574e-09	-1.30718e-08	-5.79303e-08	-1.14955e-07	-1.18707e-07	-1.06732e-07	-1.2057e-07	-1.03201e-07	-9.69491e-08	-1.02088e-07	-1.09182e-07	-1.2176e-07	-1.30847e-07	-1.34065e-07	-1.30668e-07	-1.15372e-07	-1.09158e-07	-1.10897e-07	-1.07747e-07	-7.8386e-08	-6.84527e-08	-7.42215e-08	-4.52613e-08	-1.18115e-08	-4.31677e-09	-3.61344e-09	-3.80973e-09	-1.16372e-08	-3.02595e-08	-3.99431e-08
7.2	0.8	-1.45188e-09	-1.55887e-09	-1.37216e-09	-1.30722e-09	-1.42498e-09	-1.59582e-09	-1.53965e-09	-1.68156e-09	-1.73938e-09	-1.67763e-09	-1.68653e-09	-1.71678e-09	-1.84118e-09	-1.98326e-09	-2.23761e-09	-2.51503e-09	-2.60401e-09	-2.81682e-09	-2.96827e-09	-4.23368e-09	-2.02757e-08	-6.54191e-08	-9.3449e-08	-9.7308e-08	-1.15688e-07	-1.15875e-07	-1.11396e-07	-1.08865e-07	-1.12565e-07	-1.23892e-07	-1.3626e-07	-1.42376e-07	-1.41054e-07	-1.22744e-07	-1.1488e-07	-1.18366e-07	-1.14868e-07	-8.95991e-08	-6.63516e-08	-4.41984e-08	-1.6792e-08	-4.9608e-09	-3.00797e-09	-3.11202e-09	-3.1763e-09	-3.619e-09	-8.56449e-09	-1.81651e-08
7.3	0.7	-1.69178e-09	-1.34231e-09	-1.28772e-09	-1.29234e-09	-1.37484e-09	-1.64537e-09	-1.50775e-09	-1.62305e-09	-1.5825e-09	-1.57094e-09	-1.6086e-09	-1.62871e-09	-1.67826e-09	-1.84865e-09	-1.9637e-09	-2.41954e-09	-2.33374e-09	-2.67232e-09	-2.73998e-09	-3.11e-09	-5.45025e-09	-2.01172e-08	-5.68042e-08	-9.08886e-08	-1.16376e-07	-1.28993e-07	-1.27399e-07	-1.19435e-07	-1.14704e-07	-1.19499e-07	-1.28678e-07	-1.34068e-07	-1.33649e-07	-1.15538e-07	-1.05012e-07	-1.11166e-07	-1.09077e-07	-7.79572e-08	-3.94887e-08	-1.52429e-08	-5.02217e-09	-2.83693e-09	-2.5921e-09	-2.81843e-09	-2.88561e-09	-2.94589e-09	-3.26447e-09	-5.44835e-09
7.4	0.6	-1.69615e-09	-1.28116e-09	-1.06316e-09	-1.30275e-09	-1.28544e-09	-1.36849e-09	-1.53439e-09	-1.43991e-09	-1.62257e-09	-1.53314e-09	-1.58883e-09	-1.55804e-09	-1.69943e-09	-1.8776e-09	-1.98719e-09	-2.31238e-09	-2.17158e-09	-2.36594e-09	-2.48938e-09	-2.67502e-09	-3.07288e-09	-4.84846e-09	-1.60432e-08	-4.71869e-08	-9.37187e-08	-1.17178e-07	-1.22526e-07	-1.23011e-07	-1.22208e-07	-1.22932e-07	-1.30849e-07	-1.35771e-07	-1.36562e-07	-1.25331e-07	-1.14703e-07	-1.0762e-07	-8.12166e-08	-4.03244e-08	-1.27136e-08	-4.57078e-09	-2.72377e-09	-2.38597e-09	-2.30964e-09	-2.42451e-09	-2.64263e-09	-2.45378e-09	-2.55362e-09	-2.95268e-09
7.5	0.5	-1.41103e-09	-1.03614e-09	-1.2614e-09	-1.18448e-09	-1.267e-09	-1.33216e-09	-1.51721e-09	-1.39311e-09	-1.42641e-09	-1.45479e-09	-1.51936e-09	-1.5376e-09	-1.52753e-09	-1.83048e-09	-1.82067e-09	-2.03404e-09	-2.10973e-09	-1.9783e-09	-2.17758e-09	-2.34454e-09	-2.50044e-09	-3.01889e-09	-3.72195e-09	-1.00408e-08	-2.94553e-08	-6.76494e-08	-9.35348e-08	-1.0004e-07	-1.12946e-07	-1.29589e-07	-1.42804e-07	-1.37846e-07	-1.31028e-07	-1.03812e-07	-8.15316e-08	-5.53483e-08	-2.58241e-08	-8.95152e-09	-3.5386e-09	-2.76255e-09	-2.41883e-09	-2.19084e-09	-2.14951e-09	-2.35476e-09	-2.20436e-09	-2.22609e-09	-2.16557e-09	-2.4914e-09
7.6	0.4	-1.10325e-09	-1.17706e-09	-1.15693e-09	-1.19152e-09	-1.24251e-09	-1.24123e-09	-1.34571e-09	-1.36478e-09	-1.38391e-09	-1.50526e-09	-1.34798e-09	-1.45225e-09	-1.38759e-09	-1.64288e-09	-1.59743e-09	-1.92607e-09	-1.78135e-09	-1.86601e-09	-2.02161e-09	-2.20772e-09	-2.28961e-09	-2.45302e-09	-2.47892e-09	-2.98212e-09	-4.78294e-09	-1.22621e-08	-2.12287e-08	-2.981e-08	-4.11477e-08	-5.81224e-08	-7.24459e-08	-6.45982e-08	-5.2502e-08	-3.36415e-08	-1.84711e-08	-9.82779e-09	-4.90086e-09	-2.83963e-09	-2.47434e-09	-2.47417e-09	-2.23081e-09	-2.08981e-09	-2.01684e-09	-1.9095e-09	-2.02941e-09	-1.94594e-09	-2.06059e-09	-2.14445e-09
7.7	0.3	-1.09841e-09	-1.08789e-09	-1.21754e-09	-1.19748e-09	-1.32156e-09	-1.27504e-09	-1.21046e-09	-1.35201e-09	-1.33104e-09	-1.34812e-09	-1.30955e-09	-1.30802e-09	-1.38643e-09	-1.5255e-09	-1.71516e-09	-1.65369e-09	-1.64478e-09	-1.75088e-09	-1.88327e-09	-1.87522e-09	-1.98749e-09	-1.94862e-09	-2.11843e-09	-2.29472e-09	-2.54157e-09	-2.80779e-09	-3.47031e-09	-4.18013e-09	-5.65357e-09	-7.61333e-09	-9.61737e-09	-8.43292e-09	-6.52092e-09	-4.4576e-09	-3.18651e-09	-2.62358e-09	-2.73017e-09	-2.5214e-09	-2.27669e-09	-2.23015e-09	-2.14414e-09	-2.10924e-09	-1.82541e-09	-1.86576e-09	-1.93372e-09	-1.95194e-09	-2.02748e-09	-1.95068e-09
7.8	0.2	-1.0665e-09	-1.23389e-09	-1.16687e-09	-1.18938e-09	-1.20841e-09	-1.20568e-09	-1.25622e-09	-1.13443e-09	-1.22093e-09	-1.11229e-09	-1.26692e-09	-1.2748e-09	-1.40175e-09	-1.44453e-09	-1.63323e-09	-1.61365e-09	-1.82933e-09	-1.65657e-09	-1.70573e-09	-1.69697e-09	-1.63811e-09	-1.82963e-09	-1.79144e-09	-1.97773e-09	-2.18877e-09	-2.20575e-09	-2.27964e-09	-2.3649e-09	-2.47693e-09	-2.6731e-09	-2.5419e-09	-2.40658e-09	-2.29826e-09	-2.16975e-09	-2.2966e-09	-2.25874e-09	-2.46323e-09	-2.37866e-09	-2.17286e-09	-2.11765e-09	-1.92527e-09	-1.79262e-09	-1.65375e-09	-1.79112e-09	-1.73461e-09	-1.80695e-09	-1.65248e-09	-1.8399e-09
7.9	0.1	-1.08825e-09	-1.19558e-09	-1.33283e-09	-1.27171e-09	-1.21013e-09	-1.24876e-09	-1.22497e-09	-1.13899e-09	-1.05313e-09	-1.14984e-09	-1.1491e-09	-1.29525e-09	-1.29591e-09	-1.43349e-09	-1.55885e-09	-1.61574e-09	-1.55292e-09	-1.53113e-09	-1.51194e-09	-1.51739e-09	-1.53249e-09	-1.61323e-09	-1.76341e-09	-1.74819e-09	-1.89393e-09	-1.84489e-09	-1.82031e-09	-1.92423e-09	-2.00545e-09	-2.02855e-09	-1.94722e-09	-2.01883e-09	-1.85999e-09	-1.8916e-09	-1.94904e-09	-2.03553e-09	-2.07087e-09	-2.15661e-09	-1.99817e-09	-2.11364e-09	-1.76463e-09	-1.54971e-09	-1.59904e-09	-1.63412e-09	-1.75041e-09	-1.67145e-09	-1.79229e-09	-1.65898e-09
8	0	-1.12876e-09	-1.09945e-09	-1.18403e-09	-1.14014e-09	-1.22422e-09	-1.16587e-09	-1.15346e-09	-1.09801e-09	-1.03411e-09	-1.14857e-09	-1.15325e-09	-1.21055e-09	-1.30265e-09	-1.39186e-09	-1.5457e-09	-1.52765e-09	-3.15544e-09	-1.3911e-09	-1.41997e-09	-1.40443e-09	-1.44656e-09	-1.58202e-09	-1.62173e-09	-1.64785e-09	-1.7324e-09	-1.67507e-09	-1.67264e-09	-1.69416e-09	-1.66054e-09	-1.65957e-09	-1.68964e-09	-1.74936e-09	-1.65576e-09	-1.71802e-09	-1.80042e-09	-1.95295e-09	-1.85358e-09	-1.99853e-09	-1.89883e-09	-2.14836e-09	-1.7612e-09	-1.53704e-09	-1.60535e-09	-1.69984e-09	-1.75091e-09	-1.66994e-09	-1.70228e-09	-1.63724e-09
[truncated: 33 more columns]

## Sheet: Figure 2d
Figure 2d	J-V curves of GaAs solar cells with MMPMC and glass cover, with areas of 25 mm² and 100 mm².
GaAs solar cell with an area of 25 mm².				GaAs solar cell with an area of 100 mm².
Glass cover		MMPMC		Glass cover		MMPMC
Voltage (V)	Current density (mA/cm2)	Voltage (V)	Current density (mA/cm2)	Voltage (V)	Current density (mA/cm2)	Voltage (V)	Current density (mA/cm2)
0	11.9912	0	14.1422	0	12.1201	0	13.4281
0.005	11.9881	0.005	14.1508	0.005	12.1167	0.005	13.4173
0.01	11.9792	0.01	14.1596	0.01	12.1073	0.01	13.401
0.015	11.9812	0.015	14.1586	0.015	12.1085	0.015	13.4029
0.02	11.9843	0.02	14.153	0.02	12.1235	0.02	13.4094
0.025	11.9926	0.025	14.1505	0.025	12.125	0.025	13.4259
0.03	11.9935	0.03	14.1687	0.03	12.1153	0.03	13.4167
0.035	11.9826	0.035	14.1771	0.035	12.12	0.035	13.4017
0.04	11.9761	0.04	14.1563	0.04	12.1218	0.04	13.3977
0.045	11.9831	0.045	14.1531	0.045	12.123	0.045	13.4315
0.05	11.993	0.05	14.1521	0.05	12.1102	0.05	13.4354
0.055	11.9875	0.055	14.1547	0.055	12.0984	0.055	13.4177
0.06	11.9782	0.06	14.1451	0.06	12.1134	0.06	13.4152
0.065	11.9826	0.065	14.1398	0.065	12.1156	0.065	13.4185
0.07	11.9765	0.07	14.1319	0.07	12.1116	0.07	13.4313
0.075	11.9791	0.075	14.1523	0.075	12.1075	0.075	13.408
0.07999	11.9809	0.07999	14.1484	0.08	12.0935	0.08	13.3911
0.085	11.9854	0.085	14.138	0.085	12.12	0.085	13.4023
0.09	11.9876	0.09	14.1344	0.09	12.1278	0.09	13.4104
0.095	11.9915	0.095	14.1406	0.095	12.1196	0.095	13.4051
0.09999	11.9875	0.09999	14.1552	0.1	12.1031	0.1	13.4086
0.105	11.9775	0.105	14.1586	0.105	12.1269	0.105	13.3912
0.11	11.9969	0.11	14.1575	0.11	12.1368	0.11	13.4022
0.115	11.9907	0.115	14.1491	0.115	12.1202	0.115	13.4178
0.11999	11.9912	0.11999	14.155	0.12	12.1117	0.12	13.4203
0.125	11.9847	0.125	14.1585	0.125	12.1136	0.125	13.39
0.13	11.9823	0.13	14.1468	0.13	12.1247	0.13	13.3758
0.135	11.9938	0.135	14.1352	0.135	12.1242	0.135	13.4065
0.14	11.9895	0.14	14.1486	0.14	12.1128	0.14	13.4075
0.145	11.9648	0.145	14.1598	0.145	12.0997	0.145	13.3782
0.15	11.9661	0.15	14.1615	0.15	12.1203	0.15	13.3959
0.155	11.9917	0.155	14.1519	0.155	12.1325	0.155	13.402
0.15999	11.9939	0.15999	14.1516	0.16	12.1199	0.16	13.4234
0.165	11.974	0.165	14.1608	0.165	12.1046	0.165	13.4184
0.17	11.9689	0.17	14.1744	0.17	12.1128	0.17	13.4067
0.175	11.9921	0.175	14.1547	0.175	12.1386	0.175	13.4113
0.18	12.0067	0.18	14.1463	0.18	12.1272	0.18	13.4158
0.185	11.9972	0.185	14.1439	0.185	12.1168	0.185	13.4145
0.19	11.9718	0.19	14.1456	0.19	12.1054	0.19	13.4164
0.195	11.9881	0.195	14.1569	0.195	12.1121	0.195	13.4137
0.2	12.0145	0.2	14.169	0.2	12.1283	0.2	13.4132
0.205	12.0057	0.205	14.142	0.20501	12.1269	0.20501	13.4285
0.21	12.0014	0.21	14.1522	0.21	12.1154	0.21	13.4355
0.215	11.9955	0.215	14.1717	0.215	12.1155	0.215	13.4156
0.21998	12.0033	0.21998	14.1631	0.21999	12.1263	0.21999	13.4099
0.22499	12.008	0.22499	14.1499	0.22499	12.1305	0.22499	13.4205
0.23	12.0021	0.23	14.1525	0.23	12.121	0.23	13.4284
0.23501	11.9879	0.23501	14.177	0.23501	12.1163	0.23501	13.4066
0.23998	11.9767	0.23998	14.176	0.23999	12.1126	0.23999	13.4074
0.24499	11.9916	0.24499	14.1589	0.245	12.1121	0.245	13.3903
0.25	11.9971	0.25	14.1503	0.25	12.1039	0.25	13.4053
0.25501	11.9824	0.25501	14.1461	0.25501	12.11	0.25501	13.4202
0.25998	11.9735	0.25998	14.1578	0.25998	12.1289	0.25998	13.4148
0.26499	11.982	0.26499	14.1545	0.26499	12.1274	0.26499	13.3982
0.27	11.9934	0.27	14.1384	0.27	12.1142	0.27	13.407
0.27497	11.9932	0.27497	14.138	0.27497	12.1053	0.27497	13.4267
0.27998	11.9812	0.27998	14.1662	0.27999	12.1172	0.27999	13.419
0.28499	11.9846	0.28499	14.1698	0.28499	12.1286	0.28499	13.4054
0.29	11.9871	0.29	14.1682	0.29	12.1251	0.29	13.4055
0.29497	11.9903	0.29497	14.1636	0.29498	12.108	0.29498	13.4296
0.29998	11.9875	0.29998	14.1632	0.29998	12.1042	0.29998	13.4246
0.30499	11.9861	0.30499	14.1618	0.305	12.108	0.305	13.4117
0.31	11.9872	0.31	14.1633	0.31	12.1018	0.31	13.4035
0.31498	11.9908	0.31498	14.1567	0.31498	12.12	0.31498	13.4138
0.31998	11.9838	0.31998	14.159	0.31999	12.1243	0.31999	13.4159
0.325	11.9787	0.325	14.1523	0.325	12.1297	0.325	13.396
0.32998	11.9881	0.32998	14.142	0.32998	12.1337	0.32998	13.4068
0.33498	11.9946	0.33498	14.1369	0.33498	12.1287	0.33498	13.4186
0.33999	11.9849	0.33999	14.1414	0.34	12.128	0.34	13.4286
0.345	11.968	0.345	14.1632	0.345	12.1297	0.345	13.4203
0.34997	11.975	0.34997	14.1585	0.34998	12.1336	0.34998	13.3917
0.35499	11.9924	0.35499	14.143	0.35499	12.1309	0.35499	13.4093
0.35999	11.9967	0.35999	14.1446	0.36	12.1226	0.36	13.43
0.36501	11.9829	0.36501	14.1559	0.36501	12.1129	0.36501	13.4129
0.36998	11.9715	0.36998	14.1524	0.36998	12.1093	0.36998	13.3964
0.37499	11.9859	0.37499	14.1534	0.37499	12.1208	0.37499	13.4026
0.38	11.987	0.38	14.1474	0.38	12.1102	0.38	13.4047
0.385	11.9741	0.385	14.138	0.38501	12.1324	0.38501	13.3948
0.38998	11.9645	0.38998	14.1474	0.38998	12.1347	0.38998	13.3911
0.39498	11.9791	0.39498	14.1464	0.39498	12.1392	0.39498	13.383
0.4	11.9924	0.4	14.1377	0.4	12.1348	0.4	13.3867
0.40497	11.9796	0.40497	14.1294	0.40497	12.1336	0.40497	13.3901
0.40997	11.9663	0.40997	14.14	0.40998	12.1371	0.40998	13.3952
0.41499	11.9702	0.41499	14.1546	0.41499	12.1249	0.41499	13.3851
0.41999	11.9896	0.41999	14.1518	0.41999	12.1239	0.41999	13.3905
0.42497	11.9896	0.42497	14.1513	0.42498	12.1093	0.42498	13.3802
0.42998	11.9775	0.42998	14.1481	0.42998	12.1217	0.42998	13.4073
0.43499	11.9816	0.43499	14.145	0.43499	12.1263	0.43499	13.4107
0.44	11.9951	0.44	14.1394	0.44	12.1044	0.44	13.3909
0.44497	11.9906	0.44497	14.1352	0.44497	12.1123	0.44497	13.3841
0.44998	11.9783	0.44998	14.1388	0.44999	12.1097	0.44999	13.4004
0.45499	11.9773	0.45499	14.1408	0.45499	12.1159	0.45499	13.3839
0.46	11.9801	0.46	14.1408	0.46	12.124	0.46	13.3939
0.46498	11.9853	0.46498	14.1431	0.46498	12.1272	0.46498	13.389
0.46999	11.9851	0.46999	14.143	0.46999	12.1242	0.46999	13.3793
0.475	11.9697	0.475	14.1335	0.475	12.1107	0.475	13.381
0.47997	11.9676	0.47997	14.1396	0.47997	12.1138	0.47997	13.4112
0.48498	11.9867	0.48498	14.1303	0.48498	12.1122	0.48498	13.4038
0.48999	11.9794	0.48999	14.1357	0.49	12.1189	0.49	13.3873
0.49499	11.9755	0.49499	14.1357	0.495	12.1257	0.495	13.4058
0.49998	11.9703	0.49998	14.1388	0.49998	12.1303	0.49998	13.4047
0.50498	11.9754	0.50498	14.1424	0.50499	12.1216	0.50499	13.4126
0.51	11.9807	0.51	14.1389	0.51	12.1141	0.51	13.3922
0.515	11.9808	0.515	14.1372	0.51501	12.1036	0.51501	13.3842
0.51997	11.9874	0.51997	14.1328	0.51998	12.0969	0.51998	13.3953
0.52499	11.9699	0.52499	14.1301	0.52499	12.1093	0.52499	13.3907
0.52999	11.9715	0.52999	14.1416	0.52999	12.1043	0.52999	13.3911
0.53497	11.9872	0.53497	14.1398	0.53497	12.1017	0.53497	13.3827
0.53998	11.9799	0.53998	14.1413	0.53998	12.0932	0.53998	13.3711
0.54498	11.9664	0.54498	14.148	0.54498	12.1053	0.54498	13.3756
0.54999	11.9771	0.54999	14.1521	0.55	12.115	0.55	13.3784
0.55496	11.9942	0.55496	14.1402	0.55497	12.0975	0.55497	13.3761
0.55998	11.9904	0.55998	14.1333	0.55998	12.091	0.55998	13.3839
0.56499	11.9762	0.56499	14.1302	0.56499	12.1158	0.56499	13.392
0.56999	11.9713	0.56999	14.1369	0.56999	12.1155	0.56999	13.3872
0.57497	11.9762	0.57497	14.1393	0.57498	12.1132	0.57498	13.3743
0.57998	11.987	0.57998	14.1425	0.57998	12.1003	0.57998	13.3892
0.58499	11.9807	0.58499	14.1394	0.58499	12.106	0.58499	13.3877
0.59	11.9619	0.59	14.143	0.59	12.1106	0.59	13.3877
0.59497	11.9713	0.59497	14.141	0.59498	12.1101	0.59498	13.3747
0.59999	11.9781	0.59999	14.1377	0.59999	12.0995	0.59999	13.3749
0.60499	11.9789	0.60499	14.1233	0.605	12.0982	0.605	13.3926
0.60997	11.9605	0.60997	14.138	0.60997	12.1129	0.60997	13.3847
0.61498	11.9656	0.61498	14.1516	0.61498	12.1196	0.61498	13.379
0.61998	11.9797	0.61998	14.1576	0.61999	12.1069	0.61999	13.3592
0.625	11.9862	0.625	14.1376	0.625	12.103	0.625	13.4031
0.62997	11.9731	0.62997	14.1369	0.62997	12.1018	0.62997	13.362
0.63498	11.9624	0.63498	14.1389	0.63499	12.1244	0.63499	13.3761
0.63999	11.9743	0.63999	14.1608	0.63999	12.1179	0.63999	13.3634
0.645	11.9807	0.645	14.1397	0.645	12.1095	0.645	13.3636
0.64998	11.9721	0.64998	14.1327	0.64998	12.1115	0.64998	13.3646
0.65498	11.9737	0.65498	14.1232	0.65498	12.121	0.65498	13.3874
0.65999	11.9806	0.65999	14.143	0.66	12.1029	0.66	13.3801
0.66499	11.9773	0.66499	14.146	0.665	12.0933	0.665	13.3581
0.66997	11.9695	0.66997	14.1512	0.66998	12.0886	0.66998	13.3597
0.67498	11.9774	0.67498	14.147	0.67498	12.0949	0.67498	13.375
0.67998	11.9716	0.67998	14.1439	0.67999	12.0938	0.67999	13.379
0.68496	11.9574	0.68496	14.1488	0.68497	12.1042	0.68497	13.3787
0.68997	11.9543	0.68997	14.138	0.68997	12.0862	0.68997	13.3788
0.69498	11.9646	0.69498	14.1333	0.69499	12.0886	0.69499	13.3844
0.69999	11.9656	0.69999	14.1281	0.7	12.1121	0.7	13.4088
0.70496	11.9657	0.70496	14.152	0.70497	12.1146	0.70497	13.3867
0.70997	11.9672	0.70997	14.1542	0.70998	12.1006	0.70998	13.3732
0.71498	11.9698	0.71498	14.1494	0.71498	12.1024	0.71498	13.3808
0.71999	11.9639	0.71999	14.1419	0.72	12.1001	0.72	13.3804
0.72497	11.9674	0.72497	14.1387	0.72497	12.1012	0.72497	13.3784
0.72998	11.9813	0.72998	14.1322	0.72998	12.0856	0.72998	13.3705
0.73499	11.9764	0.73499	14.1353	0.73499	12.088	0.73499	13.3599
0.74	11.9615	0.74	14.1356	0.74	12.1175	0.74	13.3682
0.74497	11.9591	0.74497	14.1312	0.74498	12.1171	0.74498	13.3919
0.74998	11.9667	0.74998	14.1408	0.74998	12.1051	0.74998	13.3606
0.75499	11.9804	0.75499	14.1584	0.75499	12.0935	0.75499	13.3377
0.75997	11.9785	0.75997	14.1504	0.75997	12.099	0.75997	13.361
0.76497	11.9616	0.76497	14.1331	0.76498	12.1144	0.76498	13.3818
0.76998	11.9629	0.76998	14.1211	0.76999	12.1164	0.76999	13.4016
0.77499	11.9663	0.77499	14.1406	0.775	12.1128	0.775	13.384
0.77997	11.9664	0.77997	14.1538	0.77997	12.0952	0.77997	13.3849
0.78498	11.9704	0.78498	14.1436	0.78498	12.0988	0.78498	13.3135
0.78998	11.9602	0.78998	14.1286	0.78998	12.1008	0.78998	13.3033
0.79499	11.9689	0.79499	14.1236	0.795	12.106	0.795	13.3052
0.79996	11.9812	0.79996	14.1461	0.79997	12.1015	0.79997	13.3002
0.80498	11.9801	0.80498	14.1488	0.80498	12.0972	0.80498	13.2897
0.80999	11.965	0.80999	14.1369	0.80999	12.1054	0.80999	13.2896
0.81495	11.9679	0.81495	14.1442	0.81496	12.1176	0.81496	13.3164
0.81997	11.9811	0.81997	14.1454	0.81997	12.0905	0.81997	13.305
0.82497	11.9802	0.82497	14.1412	0.82498	12.093	0.82498	13.3066
0.82999	11.9748	0.82999	14.1217	0.82999	12.1297	0.82999	13.2998
0.83496	11.9607	0.83496	14.1141	0.83497	12.1254	0.83497	13.2957
0.83997	11.9593	0.83997	14.134	0.83997	12.1059	0.83997	13.2917
0.84498	11.9761	0.84498	14.1601	0.84498	12.1025	0.84498	13.2971
0.84998	11.9759	0.84998	14.1351	0.84999	12.108	0.84999	13.3125
0.85496	11.9668	0.85496	14.1282	0.85497	12.1134	0.85497	13.3069
0.85997	11.9557	0.85997	14.1254	0.85997	12.1089	0.85997	13.2982
0.86498	11.9713	0.86498	14.1442	0.86498	12.1017	0.86498	13.2941
0.86999	11.9797	0.86999	14.1327	0.87	12.0999	0.87	13.2989
0.87497	11.9787	0.87497	14.131	0.87497	12.1189	0.87497	13.2987
0.87998	11.9607	0.87998	14.1156	0.87998	12.1139	0.87998	13.2875
0.88498	11.9591	0.88498	14.139	0.88499	12.1021	0.88499	13.2872
0.88996	11.9737	0.88996	14.1551	0.88996	12.0901	0.88996	13.3052
0.89497	11.9773	0.89497	14.1433	0.89498	12.1009	0.89498	13.3066
0.89997	11.971	0.89997	14.1174	0.89998	12.0983	0.89998	13.3163
0.90499	11.9575	0.90499	14.1251	0.90499	12.106	0.90499	13.3028
0.90996	11.9634	0.90996	14.1504	0.90997	12.1014	0.90997	13.2925
0.91497	11.9795	0.91497	14.1392	0.91498	12.1008	0.91498	13.296
0.91998	11.977	0.91998	14.1313	0.91999	12.1194	0.91999	13.2884
0.92499	11.9665	0.92499	14.133	0.92499	12.1184	0.92499	13.2725
0.92996	11.9601	0.92996	14.1457	0.92997	12.1017	0.92997	13.2963
0.93496	11.9833	0.93496	14.1392	0.93497	12.0955	0.93497	13.3065
0.93998	11.9791	0.93998	14.1395	0.93998	12.1169	0.93998	13.303
0.94499	11.9684	0.94499	14.1223	0.94499	12.1211	0.94499	13.2842
0.94996	11.9579	0.94996	14.1352	0.94996	12.122	0.94996	13.2968
0.95497	11.9689	0.95497	14.1317	0.95498	12.1113	0.95498	13.3102
0.95998	11.9798	0.95998	14.1356	0.95998	12.0967	0.95998	13.3082
0.96496	11.969	0.96496	14.1303	0.96496	12.1031	0.96496	13.2968
0.96997	11.9618	0.96997	14.1225	0.96997	12.1071	0.96997	13.2994
0.97497	11.9585	0.97497	14.1358	0.97497	12.0891	0.97497	13.2903
0.97998	11.9646	0.97998	14.1375	0.97999	12.0884	0.97999	13.2895
0.98495	11.9692	0.98495	14.1305	0.98496	12.1006	0.98496	13.3165
0.98997	11.9783	0.98997	14.1306	0.98997	12.0993	0.98997	13.3026
0.99498	11.9636	0.99498	14.1372	0.99498	12.0991	0.99498	13.3155
0.99999	11.9505	0.99999	14.1338	0.99999	12.1061	0.99999	13.3217
1.00496	11.9512	1.00496	14.1319	1.00497	12.1012	1.00497	13.3212
1.00997	11.9544	1.00997	14.1326	1.00997	12.1028	1.00997	13.3085
1.01498	11.9659	1.01498	14.1309	1.01498	12.1026	1.01498	13.3067
1.01998	11.975	1.01998	14.1369	1.01999	12.094	1.01999	13.3002
1.02496	11.962	1.02496	14.1473	1.02497	12.0908	1.02497	13.3062
1.02998	11.9568	1.02998	14.1442	1.02998	12.1002	1.02998	13.3163
1.03498	11.9622	1.03498	14.1192	1.03498	12.0994	1.03498	13.3147
1.03996	11.9744	1.03996	14.1328	1.03996	12.0923	1.03996	13.305
1.04496	11.9655	1.04496	14.1375	1.04497	12.0862	1.04497	13.3032
1.04998	11.956	1.04998	14.1292	1.04998	12.08	1.04998	13.3341
1.05498	11.9533	1.05498	14.1288	1.05499	12.0814	1.05499	13.3167
1.05995	11.9597	1.05995	14.1473	1.05996	12.0877	1.05996	13.2954
1.06497	11.9542	1.06497	14.1456	1.06497	12.0897	1.06497	13.2909
1.06997	11.9545	1.06997	14.1392	1.06998	12.0803	1.06998	13.2957
1.07498	11.9598	1.07498	14.1322	1.07499	12.1079	1.07499	13.3152
1.07996	11.9717	1.07996	14.1183	1.07997	12.1133	1.07997	13.3104
1.08496	11.9658	1.08496	14.1246	1.08497	12.0989	1.08497	13.3082
1.08997	11.9539	1.08997	14.138	1.08998	12.0905	1.08998	13.3103
1.09495	11.955	1.09495	14.1338	1.09496	12.0974	1.09496	13.3105
1.09996	11.9731	1.09996	14.115	1.09997	12.1136	1.09997	13.3151
1.10498	11.9695	1.10498	14.127	1.10498	12.1013	1.10498	13.3064
1.10998	11.971	1.10998	14.1396	1.10998	12.0979	1.10998	13.3037
1.11495	11.9542	1.11495	14.1409	1.11496	12.0922	1.11496	13.2867
1.11996	11.951	1.11996	14.1295	1.11996	12.0992	1.11996	13.2924
1.12497	11.9599	1.12497	14.1132	1.12498	12.0973	1.12498	13.2899
1.12998	11.9618	1.12998	14.1388	1.12999	12.0781	1.12999	13.2946
1.13496	11.9578	1.13496	14.1527	1.13496	12.0742	1.13496	13.3005
1.13997	11.9574	1.13997	14.1313	1.13997	12.0878	1.13997	13.3137
1.14498	11.9616	1.14498	14.1287	1.14498	12.1049	1.14498	13.3169
1.14998	11.9585	1.14998	14.1333	1.14999	12.1023	1.14999	13.31
1.15496	11.9589	1.15496	14.1436	1.15496	12.0927	1.15496	13.3099
1.15996	11.9556	1.15996	14.1353	1.15997	12.0918	1.15997	13.3114
1.16498	11.9684	1.16498	14.1194	1.16499	12.0948	1.16499	13.3233
1.16995	11.9622	1.16995	14.1187	1.16996	12.0933	1.16996	13.314
1.17496	11.9611	1.17496	14.1388	1.17497	12.0948	1.17497	13.2986
1.17997	11.9532	1.17997	14.1441	1.17998	12.0819	1.17998	13.3033
1.18498	11.9722	1.18498	14.1202	1.18499	12.0942	1.18499	13.31
1.18996	11.9754	1.18996	14.1043	1.18996	12.1007	1.18996	13.3008
1.19496	11.9616	1.19496	14.1208	1.19496	12.0991	1.19496	13.2959
1.19998	11.9541	1.19998	14.1407	1.19998	12.0814	1.19998	13.2924
1.20498	11.9597	1.20498	14.1303	1.20498	12.0903	1.20498	13.288
1.20996	11.9821	1.20996	14.1264	1.20996	12.0997	1.20996	13.3122
1.21497	11.9781	1.21497	14.1225	1.21497	12.1077	1.21497	13.3168
1.21997	11.9664	1.21997	14.1352	1.21997	12.0939	1.21997	13.3074
1.22498	11.9609	1.22498	14.1297	1.22499	12.0874	1.22499	13.3176
1.22995	11.9617	1.22995	14.1324	1.22996	12.1004	1.22996	13.3169
1.23497	11.976	1.23497	14.1203	1.23497	12.1128	1.23497	13.3079
1.23998	11.9759	1.23998	14.1255	1.23998	12.0954	1.23998	13.293
1.24495	11.9601	1.24495	14.1387	1.24495	12.087	1.24495	13.2946
1.24996	11.9507	1.24996	14.1437	1.24997	12.0884	1.24997	13.2915
1.25497	11.9637	1.25497	14.1228	1.25497	12.0928	1.25497	13.3013
1.25998	11.9664	1.25998	14.1352	1.25999	12.1009	1.25999	13.3004
1.26495	11.9761	1.26495	14.142	1.26496	12.1066	1.26496	13.3049
1.26996	11.9666	1.26996	14.1465	1.26997	12.0997	1.26997	13.2991
1.27497	11.9532	1.27497	14.1339	1.27498	12.0883	1.27498	13.2897
1.27998	11.9622	1.27998	14.1364	1.27999	12.0993	1.27999	13.2839
1.28496	11.9569	1.28496	14.137	1.28496	12.0874	1.28496	13.3096
1.28997	11.9462	1.28997	14.1316	1.28997	12.078	1.28997	13.299
1.29497	11.9629	1.29497	14.138	1.29498	12.0745	1.29498	13.3095
1.29996	11.976	1.29996	14.1327	1.29996	12.085	1.29996	13.3028
1.30496	11.9606	1.30496	14.125	1.30496	12.0939	1.30496	13.2985
1.30997	11.9459	1.30997	14.1122	1.30997	12.089	1.30997	13.3155
1.31498	11.9507	1.31498	14.1311	1.31498	12.0731	1.31498	13.2989
1.31996	11.9646	1.31996	14.1414	1.31997	12.0744	1.31997	13.3097
1.32496	11.9694	1.32496	14.1258	1.32497	12.0859	1.32497	13.3037
1.32997	11.9541	1.32997	14.1184	1.32997	12.0835	1.32997	13.2936
1.33498	11.9547	1.33498	14.1251	1.33499	12.0768	1.33499	13.3017
1.33995	11.9769	1.33995	14.1314	1.33995	12.0621	1.33995	13.2895
1.34496	11.9808	1.34496	14.1279	1.34497	12.0753	1.34497	13.2886
1.34997	11.9661	1.34997	14.1264	1.34998	12.0877	1.34998	13.2846
1.35497	11.9631	1.35497	14.1237	1.35498	12.079	1.35498	13.2818
1.35995	11.9796	1.35995	14.1332	1.35996	12.0699	1.35996	13.2842
1.36496	11.9815	1.36496	14.1386	1.36496	12.0752	1.36496	13.2835
1.36997	11.9841	1.36997	14.1342	1.36998	12.0842	1.36998	13.2989
1.37495	11.975	1.37495	14.1211	1.37496	12.0927	1.37496	13.2778
1.37995	11.9648	1.37995	14.1256	1.37996	12.0766	1.37996	13.2787
1.38497	11.9667	1.38497	14.1372	1.38497	12.0735	1.38497	13.2833
1.38997	11.9688	1.38997	14.1371	1.38997	12.0945	1.38997	13.2785
1.39495	11.9595	1.39495	14.1323	1.39496	12.0782	1.39496	13.2718
1.39996	11.9414	1.39996	14.1276	1.39997	12.0743	1.39997	13.2662
1.40497	11.9613	1.40497	14.1442	1.40498	12.0655	1.40498	13.2597
1.40998	11.9627	1.40998	14.1316	1.40999	12.0743	1.40999	13.2727
1.41496	11.9583	1.41496	14.121	1.41496	12.0841	1.41496	13.2511
1.41996	11.9534	1.41996	14.1146	1.41997	12.0776	1.41997	13.2576
1.42497	11.9483	1.42497	14.1388	1.42498	12.0648	1.42498	13.2439
1.42998	11.9654	1.42998	14.1418	1.42998	12.0588	1.42998	13.262
1.43496	11.9747	1.43496	14.1265	1.43497	12.0786	1.43497	13.2569
1.43996	11.9674	1.43996	14.1237	1.43997	12.0829	1.43997	13.2428
1.44498	11.9584	1.44498	14.1351	1.44498	12.075	1.44498	13.2537
1.44995	11.9644	1.44995	14.1429	1.44995	12.0561	1.44995	13.2424
1.45496	11.9744	1.45496	14.1256	1.45497	12.0671	1.45497	13.252
1.45997	11.9752	1.45997	14.1236	1.45997	12.0733	1.45997	13.2715
1.46497	11.9621	1.46497	14.1184	1.46498	12.0659	1.46498	13.2675
1.46995	11.9503	1.46995	14.1365	1.46996	12.0548	1.46996	13.2506
1.47496	11.9478	1.47496	14.1225	1.47497	12.0605	1.47497	13.2398
1.47997	11.9561	1.47997	14.1199	1.47998	12.0712	1.47998	13.2504
1.48498	11.9602	1.48498	14.1127	1.48498	12.0743	1.48498	13.2726
1.48995	11.9549	1.48995	14.1223	1.48995	12.0651	1.48995	13.2688
1.49496	11.9522	1.49496	14.129	1.49496	12.0494	1.49496	13.2709
1.49996	11.9482	1.49996	14.1223	1.49997	12.0626	1.49997	13.2735
1.50498	11.961	1.50498	14.1119	1.50498	12.0855	1.50498	13.2746
1.50996	11.9578	1.50996	14.1146	1.50996	12.0791	1.50996	13.2865
1.51496	11.9587	1.51496	14.1348	1.51496	12.0534	1.51496	13.2922
1.51997	11.965	1.51997	14.1356	1.51998	12.0537	1.51998	13.2964
1.52494	11.9693	1.52494	14.1195	1.52495	12.0744	1.52495	13.2874
1.52995	11.9611	1.52995	14.1133	1.52996	12.0772	1.52996	13.2927
1.53497	11.9589	1.53497	14.1341	1.53497	12.0612	1.53497	13.2949
1.53997	11.9665	1.53997	14.1543	1.53998	12.0623	1.53998	13.2809
1.54496	11.963	1.54496	14.1328	1.54496	12.0645	1.54496	13.2654
1.54997	11.9586	1.54997	14.1279	1.54997	12.0773	1.54997	13.2655
1.55497	11.9545	1.55497	14.1352	1.55498	12.069	1.55498	13.2578
1.55998	11.9452	1.55998	14.136	1.55999	12.0593	1.55999	13.2478
1.56495	11.9594	1.56495	14.1309	1.56495	12.0473	1.56495	13.2249
1.56997	11.9725	1.56997	14.1275	1.56997	12.0596	1.56997	13.2541
1.57497	11.9741	1.57497	14.1175	1.57497	12.0784	1.57497	13.2456
1.57995	11.9621	1.57995	14.1345	1.57995	12.0689	1.57995	13.2473
1.58495	11.9638	1.58495	14.1527	1.58496	12.057	1.58496	13.2353
1.58997	11.9776	1.58997	14.1327	1.58998	12.0569	1.58998	13.2224
1.59498	11.9689	1.59498	14.1101	1.59498	12.0545	1.59498	13.2424
1.59994	11.9548	1.59994	14.1219	1.59995	12.0558	1.59995	13.254
1.60496	11.947	1.60496	14.1409	1.60496	12.0429	1.60496	13.2395
1.60996	11.9663	1.60996	14.1341	1.60997	12.0447	1.60997	13.2312
1.61497	11.9778	1.61497	14.1375	1.61498	12.0727	1.61498	13.2473
1.61995	11.9737	1.61995	14.1268	1.61996	12.0685	1.61996	13.2464
1.62495	11.9652	1.62495	14.1283	1.62496	12.0599	1.62496	13.2422
1.62997	11.956	1.62997	14.1368	1.62997	12.0501	1.62997	13.2573
1.63497	11.9723	1.63497	14.1204	1.63498	12.045	1.63498	13.2639
1.63995	11.9657	1.63995	14.1125	1.63995	12.0685	1.63995	13.2649
1.64496	11.9568	1.64496	14.0997	1.64497	12.0694	1.64497	13.2583
1.64996	11.9446	1.64996	14.1395	1.64997	12.0609	1.64997	13.2627
1.65494	11.9566	1.65494	14.1395	1.65495	12.0446	1.65495	13.2554
1.65995	11.9749	1.65995	14.1243	1.65995	12.0492	1.65995	13.2448
1.66496	11.9758	1.66496	14.1221	1.66497	12.0533	1.66497	13.2389
1.66997	11.9624	1.66997	14.1244	1.66998	12.0545	1.66998	13.2577
1.67495	11.9621	1.67495	14.1439	1.67495	12.0444	1.67495	13.25
1.67996	11.9806	1.67996	14.1442	1.67996	12.0497	1.67996	13.2343
1.68497	11.9723	1.68497	14.1323	1.68497	12.0508	1.68497	13.2334
1.68997	11.9707	1.68997	14.1162	1.68998	12.0409	1.68998	13.2357
1.69495	11.9578	1.69495	14.1173	1.69496	12.0455	1.69496	13.2423
1.69996	11.9554	1.69996	14.1243	1.69996	12.0516	1.69996	13.2255
1.70498	11.9601	1.70498	14.1107	1.70498	12.0558	1.70498	13.2195
1.70998	11.9526	1.70998	14.1273	1.70998	12.0521	1.70998	13.2238
1.71495	11.9466	1.71495	14.1159	1.71496	12.034	1.71496	13.2229
1.71996	11.9616	1.71996	14.1252	1.71996	12.0268	1.71996	13.2163
1.72498	11.9748	1.72498	14.1351	1.72498	12.0306	1.72498	13.198
1.72995	11.9694	1.72995	14.1333	1.72995	12.0509	1.72995	13.1952
1.73495	11.9531	1.73495	14.119	1.73496	12.0472	1.73496	13.2117
1.73997	11.9503	1.73997	14.1308	1.73997	12.0354	1.73997	13.2067
1.74497	11.9622	1.74497	14.1281	1.74498	12.0343	1.74498	13.2058
1.74995	11.9618	1.74995	14.1209	1.74995	12.0367	1.74995	13.1933
1.75496	11.9629	1.75496	14.1123	1.75496	12.0379	1.75496	13.2025
1.75995	11.9575	1.75995	14.131	1.75996	12.0196	1.75996	13.207
1.76497	11.9438	1.76497	14.1296	1.76498	12.0157	1.76498	13.2031
1.76995	11.9523	1.76995	14.1182	1.76995	12.0293	1.76995	13.2106
1.77496	11.9671	1.77496	14.1151	1.77496	12.035	1.77496	13.2186
1.77997	11.9636	1.77997	14.1257	1.77998	12.027	1.77998	13.1993
1.78493	11.9513	1.78493	14.1208	1.78494	12.0347	1.78494	13.2143
1.78995	11.9398	1.78995	14.0996	1.78995	12.0477	1.78995	13.2218
1.79495	11.9475	1.79495	14.1012	1.79496	12.0408	1.79496	13.2128
1.79997	11.9418	1.79997	14.1301	1.79997	12.0338	1.79997	13.2155
1.80495	11.9351	1.80495	14.124	1.80495	12.0305	1.80495	13.2243
1.80995	11.9464	1.80995	14.1135	1.80996	12.0244	1.80996	13.2098
1.81496	11.953	1.81496	14.1091	1.81497	12.0452	1.81497	13.2054
1.81997	11.9542	1.81997	14.1105	1.81998	12.0401	1.81998	13.2066
1.82495	11.9411	1.82495	14.1051	1.82495	12.0214	1.82495	13.2052
1.82995	11.9364	1.82995	14.1086	1.82996	12.0178	1.82996	13.2037
1.83496	11.9677	1.83496	14.1287	1.83497	12.0299	1.83497	13.1993
1.83998	11.977	1.83998	14.1165	1.83999	12.0314	1.83999	13.1895
1.84495	11.9588	1.84495	14.1151	1.84496	12.0299	1.84496	13.1771
1.84997	11.9463	1.84997	14.1006	1.84997	12.0193	1.84997	13.1681
1.85497	11.961	1.85497	14.1111	1.85498	12.0225	1.85498	13.1769
1.85995	11.9755	1.85995	14.1179	1.85996	12.0314	1.85996	13.1915
1.86495	11.9608	1.86495	14.128	1.86496	12.0145	1.86496	13.1879
1.86996	11.9441	1.86996	14.1393	1.86997	12.0055	1.86997	13.1691
1.87497	11.9492	1.87497	14.1223	1.87498	11.9955	1.87498	13.1752
1.87994	11.9692	1.87994	14.113	1.87995	12.0182	1.87995	13.2049
1.88495	11.9608	1.88495	14.1245	1.88496	12.0035	1.88496	13.187
1.88996	11.9504	1.88996	14.1316	1.88997	12.0058	1.88997	13.1886
1.89496	11.937	1.89496	14.1203	1.89497	12.0021	1.89497	13.1877
1.89994	11.9512	1.89994	14.1188	1.89995	12.0013	1.89995	13.1822
1.90495	11.9648	1.90495	14.1194	1.90495	12.0083	1.90495	13.1765
1.90996	11.9569	1.90996	14.129	1.90997	12.0041	1.90997	13.1648
1.91497	11.9487	1.91497	14.1288	1.91498	11.9954	1.91498	13.1502
1.91995	11.9433	1.91995	14.1089	1.91995	12.0103	1.91995	13.1655
1.92496	11.9482	1.92496	14.1035	1.92496	12.0206	1.92496	13.1899
1.92996	11.9624	1.92996	14.1157	1.92997	12.0087	1.92997	13.1734
1.93494	11.9579	1.93494	14.1257	1.93494	11.9957	1.93494	13.1594
1.93995	11.9593	1.93995	14.1254	1.93996	12.0049	1.93996	13.1626
1.94496	11.9628	1.94496	14.1142	1.94496	12.0196	1.94496	13.1827
1.94997	11.9537	1.94997	14.1052	1.94997	12.0149	1.94997	13.172
1.95495	11.9483	1.95495	14.1203	1.95495	11.9958	1.95495	13.1776
1.95995	11.9422	1.95995	14.1172	1.95996	11.9953	1.95996	13.1656
1.96496	11.9555	1.96496	14.1086	1.96497	12.0149	1.96497	13.1581
1.96997	11.9616	1.96997	14.0984	1.96997	12.0092	1.96997	13.1576
1.97495	11.953	1.97495	14.1201	1.97496	11.9884	1.97496	13.1501
1.97995	11.9491	1.97995	14.111	1.97996	11.9857	1.97996	13.1494
1.98497	11.9568	1.98497	14.1179	1.98497	11.9962	1.98497	13.1636
1.98997	11.9611	1.98997	14.1126	1.98998	11.9921	1.98998	13.1654
1.99496	11.9614	1.99496	14.1243	1.99496	11.986	1.99496	13.1706
1.99997	11.9605	1.99997	14.1291	1.99997	11.994	1.99997	13.1532
2.00497	11.9452	2.00497	14.1199	2.00498	12.0032	2.00498	13.146
2.00994	11.9449	2.00994	14.1021	2.00995	12.0025	2.00995	13.1601
2.01495	11.9476	2.01495	14.0961	2.01495	11.9842	2.01495	13.1686
2.01996	11.9403	2.01996	14.1182	2.01996	11.9732	2.01996	13.1497
2.02497	11.9365	2.02497	14.1277	2.02497	11.9855	2.02497	13.1285
2.02993	11.9324	2.02993	14.1119	2.02994	11.9894	2.02994	13.1429
2.03495	11.9465	2.03495	14.1078	2.03496	11.9844	2.03496	13.1647
2.03995	11.9619	2.03995	14.1084	2.03996	11.9664	2.03996	13.1564
2.04497	11.952	2.04497	14.1119	2.04498	11.972	2.04498	13.1507
2.04995	11.9457	2.04995	14.1031	2.04995	11.9766	2.04995	13.1515
2.05495	11.9459	2.05495	14.101	2.05495	11.9804	2.05495	13.1606
2.05996	11.9486	2.05996	14.0937	2.05996	11.9603	2.05996	13.1595
2.06494	11.9484	2.06494	14.1038	2.06494	11.9629	2.06494	13.1377
2.06995	11.9454	2.06995	14.1076	2.06995	11.98	2.06995	13.1218
2.07497	11.9389	2.07497	14.1031	2.07497	11.966	2.07497	13.1274
2.07997	11.9494	2.07997	14.0934	2.07997	11.9484	2.07997	13.1333
2.08494	11.9451	2.08494	14.0893	2.08495	11.9465	2.08495	13.1233
2.08995	11.9383	2.08995	14.1039	2.08995	11.9577	2.08995	13.1115
2.09496	11.9244	2.09496	14.1013	2.09496	11.9541	2.09496	13.1099
2.09997	11.9264	2.09997	14.0888	2.09997	11.9558	2.09997	13.1037
2.10502	11.9496	2.10502	14.0826	2.10505	11.9536	2.10505	13.1041
2.11	11.9431	2.11	14.0872	2.11003	11.9588	2.11003	13.1124
2.11499	11.9191	2.11499	14.0971	2.11503	11.953	2.11503	13.117
2.11999	11.9199	2.11999	14.08	2.12002	11.9328	2.12002	13.1019
2.12499	11.93	2.12499	14.0754	2.12501	11.9218	2.12501	13.0927
2.12998	11.9269	2.12998	14.0751	2.13001	11.9256	2.13001	13.1096
2.13497	11.9167	2.13497	14.0818	2.135	11.9279	2.135	13.1048
2.13994	11.9114	2.13994	14.0814	2.13997	11.9219	2.13997	13.0828
2.14493	11.9061	2.14493	14.0679	2.14496	11.8948	2.14496	13.0767
2.1499	11.9092	2.1499	14.0536	2.14994	11.8945	2.14994	13.0831
2.1549	11.9184	2.1549	14.0642	2.15494	11.9066	2.15494	13.0755
2.15987	11.917	2.15987	14.0645	2.15991	11.9014	2.15991	13.0681
2.16486	11.9034	2.16486	14.0478	2.1649	11.8977	2.1649	13.0604
2.16978	11.8813	2.16978	14.0262	2.16982	11.8811	2.16982	13.0529
2.17477	11.8872	2.17477	14.0425	2.17481	11.8754	2.17481	13.0445
2.17975	11.8836	2.17975	14.056	2.17979	11.8739	2.17979	13.0481
2.18474	11.881	2.18474	14.041	2.18478	11.8647	2.18478	13.0455
2.18972	11.858	2.18972	14.0238	2.18976	11.876	2.18976	13.0411
2.19471	11.8601	2.19471	14.0046	2.19476	11.8669	2.19476	13.0263
2.20003	11.8462	2.20003	14.0098	2.20007	11.8579	2.20007	13.0275
2.20502	11.8426	2.20502	14.0073	2.20507	11.8546	2.20507	13.0266
2.21002	11.8249	2.21002	13.9896	2.21007	11.8266	2.21007	13.0133
2.21504	11.8192	2.21504	13.9592	2.21509	11.8015	2.21509	12.9937
2.22004	11.8223	2.22004	13.9604	2.22009	11.7798	2.22009	12.9879
2.225	11.8121	2.225	13.9421	2.22506	11.7654	2.22506	12.9671
2.23001	11.7799	2.23001	13.9309	2.23005	11.7589	2.23005	12.9446
2.23498	11.7701	2.23498	13.9115	2.23503	11.739	2.23503	12.9359
2.23998	11.7794	2.23998	13.8912	2.24003	11.7151	2.24003	12.9188
2.24495	11.7629	2.24495	13.8873	2.245	11.7182	2.245	12.9004
2.24995	11.746	2.24995	13.8685	2.24999	11.7107	2.24999	12.8635
2.25486	11.717	2.25486	13.8411	2.25491	11.6808	2.25491	12.8409
2.25985	11.7129	2.25985	13.8145	2.2599	11.6533	2.2599	12.8278
2.26483	11.6947	2.26483	13.803	2.26487	11.6323	2.26487	12.8087
2.26982	11.6664	2.26982	13.7965	2.26987	11.608	2.26987	12.778
2.27481	11.6451	2.27481	13.7566	2.27485	11.5865	2.27485	12.762
2.2798	11.6153	2.2798	13.7269	2.27984	11.5445	2.27984	12.7454
2.2848	11.5933	2.2848	13.6983	2.28484	11.5089	2.28484	12.7288
2.28979	11.5825	2.28979	13.6966	2.28982	11.481	2.28982	12.693
2.29477	11.5438	2.29477	13.6665	2.29481	11.4606	2.29481	12.6558
2.30011	11.4964	2.30011	13.6144	2.30015	11.4253	2.30015	12.6151
2.3051	11.4696	2.3051	13.5614	2.30514	11.379	2.30514	12.5865
2.31008	11.4606	2.31008	13.5378	2.31011	11.3349	2.31011	12.5374
2.31507	11.42	2.31507	13.5132	2.31511	11.2856	2.31511	12.4783
2.32005	11.3933	2.32005	13.4736	2.32008	11.2376	2.32008	12.4521
2.32505	11.3471	2.32505	13.4221	2.32508	11.1798	2.32508	12.411
2.33002	11.3123	2.33002	13.3727	2.33005	11.1168	2.33005	12.3489
2.33502	11.2778	2.33502	13.3493	2.33504	11.0599	2.33504	12.2835
2.33994	11.2213	2.33994	13.3096	2.33996	11.0111	2.33996	12.2143
2.34493	11.1625	2.34493	13.2555	2.34495	10.955	2.34495	12.1572
2.3499	11.1183	2.3499	13.1859	2.34993	10.8832	2.34993	12.1068
2.35489	11.0813	2.35489	13.1527	2.35492	10.8308	2.35492	12.0149
2.35987	11.0328	2.35987	13.1071	2.35991	10.7543	2.35991	11.9361
2.36486	10.9745	2.36486	13.0446	2.3649	10.6605	2.3649	11.8748
2.36987	10.8908	2.36987	12.9671	2.3699	10.584	2.3699	11.8227
2.37485	10.8381	2.37485	12.8984	2.37488	10.4964	2.37488	11.7323
2.37984	10.7995	2.37984	12.8511	2.37986	10.3963	2.37986	11.6343
2.38483	10.7319	2.38483	12.7833	2.38486	10.3185	2.38486	11.5439
2.38981	10.6569	2.38981	12.7024	2.38984	10.2289	2.38984	11.4726
2.39479	10.5716	2.39479	12.6101	2.39482	10.1257	2.39482	11.3757
2.39978	10.491	2.39978	12.5601	2.39982	10.012	2.39982	11.265
2.4051	10.4091	2.4051	12.4824	2.40513	9.8873	2.40513	11.1385
2.41009	10.3296	2.41009	12.3954	2.41012	9.77352	2.41012	11.0295
2.41507	10.2565	2.41507	12.2922	2.41509	9.67087	2.41509	10.9106
2.42006	10.1645	2.42006	12.1999	2.42009	9.53626	2.42009	10.768
2.42498	10.0716	2.42498	12.1021	2.42501	9.39524	2.42501	10.6338
2.42997	9.98446	2.42997	12.0121	2.42999	9.24596	2.42999	10.508
2.43495	9.87656	2.43495	11.8938	2.43498	9.11196	2.43498	10.3783
2.43994	9.7577	2.43994	11.7869	2.43997	8.96705	2.43997	10.237
2.44492	9.65796	2.44492	11.6718	2.44495	8.79991	2.44495	10.0704
2.44991	9.56181	2.44991	11.5482	2.44994	8.64324	2.44994	9.91356
2.45491	9.43682	2.45491	11.4204	2.45494	8.47985	2.45494	9.75503
2.45989	9.31163	2.45989	11.2972	2.45992	8.31535	2.45992	9.58011
2.46489	9.17349	2.46489	11.2018	2.46491	8.13369	2.46491	9.38801
2.46989	9.04543	2.46989	11.054	2.46991	7.95385	2.46991	9.20479
2.47487	8.90924	2.47487	10.9033	2.47489	7.75921	2.47489	9.02611
2.47985	8.75846	2.47985	10.7599	2.47987	7.57045	2.47987	8.82008
2.48484	8.60194	2.48484	10.607	2.48486	7.37831	2.48486	8.61184
2.48983	8.47356	2.48983	10.4435	2.48984	7.152	2.48984	8.38023
2.49481	8.30716	2.49481	10.2884	2.49484	6.91989	2.49484	8.1455
2.49979	8.12667	2.49979	10.1063	2.49981	6.70473	2.49981	7.92313
2.50477	7.95264	2.50477	9.91427	2.5048	6.48268	2.5048	7.71152
2.51003	7.78508	2.51003	9.73096	2.51005	6.21412	2.51005	7.43661
2.51502	7.60554	2.51502	9.55216	2.51504	5.93652	2.51504	7.16258
2.52	7.39794	2.52	9.33855	2.52001	5.68096	2.52001	6.91341
2.52498	7.1772	2.52498	9.11264	2.52501	5.43973	2.52501	6.67109
2.52998	6.96819	2.52998	8.91124	2.52999	5.15536	2.52999	6.37461
2.53497	6.76854	2.53497	8.68674	2.53499	4.8602	2.53499	6.06917
2.53997	6.52925	2.53997	8.44597	2.53998	4.55668	2.53998	5.76147
2.54494	6.28455	2.54494	8.19938	2.54496	4.25333	2.54496	5.44507
2.54994	6.02521	2.54994	7.93094	2.54995	3.93269	2.54995	5.12738
2.55489	5.76814	2.55489	7.67754	2.5549	3.59444	2.5549	4.775
2.55987	5.51906	2.55987	7.40486	2.55988	3.23817	2.55988	4.4116
2.56485	5.23479	2.56485	7.10915	2.56487	2.87901	2.56487	4.05452
2.56984	4.9297	2.56984	6.79651	2.56985	2.52139	2.56985	3.70066
2.57483	4.61983	2.57483	6.49468	2.57484	2.14252	2.57484	3.30421
2.57981	4.32571	2.57981	6.17241	2.57983	1.74433	2.57983	2.88246
2.5848	3.99693	2.5848	5.83504	2.5848	1.31354	2.5848	2.47108
2.58979	3.64542	2.58979	5.47973	2.58979	0.91412	2.58979	2.05031
2.59471	3.28868	2.59471	5.10106	2.59472	0.49315	2.59472	1.60902
2.59969	2.91829	2.59969	4.74418	2.59967	0.04591	2.59967	1.12747
2.60467	2.5418	2.60467	4.35248	2.60467	-0.43866	2.60467	0.63162
2.60966	2.15062	2.60966	3.92753	2.60965	-0.93471	2.60965	0.1724
2.61498	1.70691	2.61498	3.44274	2.61497	-1.45709	2.61497	-0.34514
2.61998	1.24327	2.61998	2.99861	2.61996	-1.96822	2.61996	-0.8687
2.62497	0.7758	2.62497	2.53451	2.62496	-2.51881	2.62496	-1.41364
2.62995	0.31167	2.62995	2.03898	2.62993	-3.08357	2.62993	-1.99041
2.63494	-0.17781	2.63494	1.51209	2.63493	-3.6632	2.63493	-2.56662
2.63994	-0.73112	2.63994	0.97366	2.63994	-4.24603	2.63994	-3.16892
2.64492	-1.26201	2.64492	0.42142	2.64491	-4.86858	2.64491	-3.80372
2.6499	-1.81955	2.6499	-0.13959	2.64988	-5.51295	2.64988	-4.49858
2.65489	-2.41614	2.65489	-0.77963	2.65488	-6.1988	2.65488	-5.17073
2.65988	-3.03192	2.65988	-1.41964	2.65986	-6.8899	2.65986	-5.8437
2.66486	-3.67879	2.66486	-2.0723	2.66484	-7.5949	2.66484	-6.5739

## Sheet: Figure 2e
Figure 2e	J-V curves for the self-enhancing efficiency photovoltaic module (SEPVM) and glass cover photovoltaic module (GCPVM).
GCPVM		SEPVM
Voltage (V)	Current density (mA/cm2)	Voltage (V)	Current density (mA/cm2)
0	9.17413	0	10.0231
2.30387e-06	9.17413	2.68052e-06	10.0231
0.01	9.1654	0.01	10.031
0.02	9.17027	0.02	10.0225
0.03003	9.17793	0.03003	10.0254
0.04002	9.17556	0.04003	10.0174
0.05002	9.1731	0.05003	10.0252
0.06002	9.17208	0.06003	10.0198
0.07002	9.17709	0.07003	10.0149
0.08002	9.17681	0.08002	10.0207
0.09002	9.18059	0.09002	10.016
0.10002	9.18117	0.10002	10.0318
0.11002	9.17607	0.11002	10.0274
0.12002	9.18104	0.12003	10.0181
0.13002	9.17568	0.13003	10.0141
0.14002	9.17115	0.14003	10.0294
0.15002	9.16766	0.15003	10.0328
0.16002	9.17654	0.16002	10.0296
0.17002	9.17833	0.17003	10.0234
0.18002	9.17338	0.18003	10.0288
0.19002	9.16922	0.19003	10.0317
0.20002	9.16907	0.20003	10.0443
0.21003	9.17591	0.21003	10.0311
0.22001	9.18076	0.22001	10.0344
0.23003	9.17863	0.23003	10.0355
0.24001	9.17219	0.24002	10.0284
0.25002	9.17185	0.25003	10.0211
0.26	9.18068	0.26001	10.0244
0.27002	9.17647	0.27003	10.0314
0.28001	9.16726	0.28001	10.0265
0.29003	9.17394	0.29003	10.0251
0.30001	9.17628	0.30001	10.0174
0.31003	9.17868	0.31003	10.028
0.32001	9.1665	0.32002	10.0299
0.33	9.18185	0.33001	10.026
0.34002	9.18272	0.34003	10.0222
0.35	9.18168	0.35001	10.0228
0.36002	9.18121	0.36002	10.042
0.37001	9.17785	0.37001	10.0393
0.38003	9.17725	0.38003	10.0259
0.39001	9.17772	0.39001	10.0336
0.40002	9.17703	0.40003	10.0327
0.41	9.17549	0.41	10.0382
0.42002	9.17687	0.42002	10.0341
0.43001	9.17872	0.43001	10.0419
0.44003	9.17689	0.44003	10.0323
0.45001	9.17361	0.45001	10.0382
0.46003	9.1698	0.46003	10.0321
0.47001	9.16942	0.47002	10.0237
0.48	9.17376	0.48	10.0234
0.49002	9.16459	0.49002	10.0251
0.50001	9.16768	0.50001	10.0336
0.51002	9.16734	0.51003	10.0211
0.52	9.16929	0.52	10.0166
0.53002	9.17265	0.53002	10.0199
0.54001	9.16939	0.54001	10.0275
0.55002	9.16838	0.55002	10.025
0.56001	9.17061	0.56001	10.023
0.57002	9.17473	0.57002	10.0303
0.58001	9.16505	0.58001	10.0369
0.59002	9.16413	0.59003	10.0387
0.60001	9.16621	0.60002	10.0378
0.61	9.16957	0.61	10.0313
0.62001	9.16544	0.62002	10.029
0.63	9.15718	0.63	10.042
0.64002	9.16634	0.64002	10.0393
0.65001	9.17269	0.65001	10.0318
0.66002	9.16816	0.66002	10.0309
0.67	9.16216	0.67	10.0343
0.68001	9.15961	0.68002	10.0278
0.69	9.16722	0.69	10.0283
0.70002	9.16584	0.70002	10.029
0.71	9.15681	0.71001	10.0318
0.72002	9.16472	0.72002	10.0294
0.73001	9.16982	0.73001	10.0354
0.74003	9.16121	0.74003	10.0395
0.75001	9.1522	0.75001	10.0401
0.76	9.15774	0.76	10.0436
0.77002	9.167	0.77002	10.0425
0.78	9.15876	0.78	10.0325
0.79001	9.16491	0.79001	10.027
0.8	9.16406	0.8	10.0289
0.81002	9.15263	0.81002	10.0259
0.82	9.15386	0.82	10.0218
0.83002	9.15175	0.83002	10.0248
0.84	9.14423	0.84	10.0359
0.85001	9.14197	0.85002	10.0316
0.86	9.12951	0.86	10.0261
0.87002	9.13608	0.87002	10.0255
0.88001	9.13074	0.88001	10.0261
0.88999	9.12151	0.88999	10.0197
0.90001	9.12269	0.90001	10.0292
0.90999	9.11499	0.91	10.0279
0.92001	9.12139	0.92001	10.0171
0.93	9.11594	0.93	10.0334
0.94001	9.10424	0.94001	10.0304
0.94999	9.10395	0.94999	10.0233
0.96001	9.09594	0.96001	10.0174
0.97	9.08988	0.97	10.013
0.98001	9.08089	0.98002	10.0202
0.99	9.07342	0.99	10.0167
1.00002	9.07568	1.00002	10.0079
1.01	9.06376	1.01	10.0194
1.02001	9.05548	1.02002	10.023
1.03001	9.04047	1.03001	10.0183
1.03999	9.04026	1.03999	10.0215
1.05001	9.02631	1.05001	10.0104
1.05999	9.0086	1.05999	10.0061
1.07	8.99552	1.07001	9.99934
1.07999	8.98406	1.07999	9.99708
1.09001	8.97509	1.09001	9.98336
1.1	8.95623	1.1	9.98817
1.11001	8.93232	1.11001	9.98861
1.11999	8.91373	1.11999	9.97044
1.13001	8.90272	1.13001	9.96277
1.14	8.88116	1.14	9.95736
1.15002	8.85844	1.15002	9.95312
1.16	8.84173	1.16	9.9406
1.16998	8.81828	1.16999	9.93753
1.18	8.79954	1.18001	9.92197
1.18999	8.78207	1.18999	9.90734
1.20001	8.74689	1.20001	9.90223
1.20999	8.73028	1.20999	9.88518
1.22	8.71082	1.22	9.86148
1.22999	8.67969	1.22999	9.8465
1.24001	8.65332	1.24002	9.84197
1.25	8.6347	1.25	9.82219
1.26002	8.61104	1.26002	9.80083
1.26999	8.58019	1.27	9.77129
1.28002	8.5434	1.28002	9.75701
1.29	8.51556	1.29	9.73165
1.29999	8.48886	1.29999	9.7071
1.31	8.45748	1.31	9.67934
1.31999	8.42106	1.32	9.65711
1.33	8.38076	1.33001	9.63268
1.33998	8.34165	1.33998	9.60155
1.35	8.31531	1.35001	9.57831
1.35999	8.26877	1.35999	9.54655
1.37001	8.22379	1.37001	9.50584
1.37998	8.17566	1.37999	9.4746
1.39	8.12491	1.39	9.43425
1.4	8.07256	1.4	9.39424
1.41002	8.01539	1.41002	9.35003
1.41999	7.96795	1.42	9.30905
1.43001	7.91095	1.43001	9.27694
1.43999	7.85415	1.44	9.22769
1.44998	7.79391	1.44998	9.18422
1.46	7.731	1.46	9.13712
1.46999	7.65753	1.46999	9.08372
1.48	7.59329	1.48001	9.03422
1.48998	7.51375	1.48998	8.97242
1.49999	7.4319	1.5	8.91131
1.50999	7.35487	1.50999	8.85729
1.52	7.27854	1.52001	8.8044
1.52998	7.19446	1.52999	8.73341
1.54	7.1067	1.54001	8.66502
1.55	7.01366	1.55	8.59368
1.56001	6.92245	1.56001	8.52139
1.57	6.83385	1.57	8.44006
1.57998	6.73482	1.57998	8.36069
1.59	6.62856	1.59	8.28011
1.59997	6.52893	1.59998	8.18931
1.60999	6.42472	1.60999	8.10079
1.61998	6.308	1.61998	8.00414
1.63	6.18823	1.63	7.90276
1.63998	6.06978	1.63998	7.79779
1.64999	5.94856	1.64999	7.70031
1.65997	5.82571	1.65998	7.5851
1.67	5.69825	1.67	7.46457
1.67998	5.56694	1.67999	7.34462
1.69	5.43605	1.69	7.22438
1.69998	5.30107	1.69999	7.09573
1.71	5.16054	1.71001	6.96445
1.71998	5.01111	1.71999	6.8237
1.72997	4.86267	1.72998	6.67918
1.73999	4.71607	1.73999	6.53945
1.74997	4.55888	1.74997	6.3883
1.75997	4.3994	1.75998	6.22643
1.76996	4.23728	1.76997	6.06081
1.77999	4.0723	1.77999	5.89288
1.78997	3.90707	1.78997	5.72262
1.79998	3.7343	1.79999	5.54662
1.80997	3.55573	1.80997	5.36108
1.81999	3.37644	1.81999	5.17789
1.82997	3.19759	1.82997	4.98672
1.83999	3.0063	1.84	4.78586
1.84998	2.81125	1.84998	4.5793
1.85997	2.61814	1.85997	4.36871
1.86997	2.41855	1.86998	4.15191
1.87995	2.21484	1.87996	3.92938
1.88997	2.00541	1.88998	3.70045
1.89995	1.79402	1.89996	3.46087
1.90997	1.57629	1.90997	3.21762
1.91995	1.35087	1.91996	2.97493
1.92997	1.12028	1.92997	2.71388
1.93996	0.88651	1.93996	2.44958
1.94997	0.64488	1.94998	2.17886
1.95996	0.40146	1.95996	1.90577
1.96997	0.14904	1.96998	1.62471
1.97995	-0.109	1.97996	1.33613
		1.98998	1.03879
		1.99997	0.73634
		2.00994	0.42707
		2.01996	0.10773
		2.02993	-0.21841
		2.03995	-0.55674
		2.04994	-0.89652
		2.05995	-1.24467
		2.06994	-1.6029

## Sheet: Figure 3b
Figure 3b	Contact angles of hollow cylindrical arrays with a cylinder radius of 6μm and a hole radius of 3μm at various heights.
Height of cylinder(μm)	Contact angle(°)
5	118.1
7	137.8
9	144.8
11	145.2
13	146.1
15	145.2
17	144.3
19	143.9

## Sheet: Figure 3c
Figure 3c	Contact angles and roll-off angles of PHHCA with different radii and hole diameters(R represents the cylinder radius, and r represents the central hole radius).
	Contact angle(°)	Roll angles(°)
R5r2	149.7	22.1
R5r2.5	152.1	21.5
R5r3	149.6	23.8
R6r3	150.4	23.4
R6r3.5	149.1	28.1
R6r4	147.6	27.6
R7r4	147.7	27.2
R7r4.5	149.1	28.6
R7r5	149.4	27.7

## Sheet: Figure 3e
Figure 3e	Hydrophobic durability test of the MMPMC.
Time(h)	Contact angle(°)	Roll angles(°)
0	150.7	22.9
4	151.8	22.3
8	151.8	21.7
12	151.1	22.4
16	152.1	22.3
20	151.3	21.9
24	151.3	22.3

## Sheet: Figure 4a
Figure 4a	Optical properties of ordinary soda-lime glass.
Vsible spectrum			Infrared spectral range
Wavelength(μm)	γGlass	τGlass	Wavelength(μm)	γGlass	τGlass	εGlass
0.4	0.10304	0.88566	25.0469	0.16662	0	0.83338
0.402	0.10243	0.88727	24.9265	0.17018	0	0.82982
0.404	0.10312	0.88554	24.8072	0.17428	0	0.82572
0.406	0.1039	0.88339	24.6891	0.17866	0	0.82134
0.408	0.10369	0.88426	24.5721	0.17947	0	0.82053
0.41	0.10382	0.88355	24.4562	0.17952	0	0.82048
0.412	0.10289	0.88653	24.3413	0.18306	0	0.81694
0.414	0.10247	0.88747	24.2276	0.18791	0	0.81209
0.416	0.10273	0.88623	24.1149	0.19098	0	0.80902
0.418	0.1038	0.88425	24.0033	0.19304	0	0.80696
0.42	0.10306	0.88623	23.8926	0.19548	0	0.80452
0.422	0.10257	0.88723	23.783	0.19635	0	0.80365
0.424	0.10239	0.88686	23.6745	0.19639	1.11022e-16	0.80361
0.426	0.10268	0.88595	23.5668	0.1987	0	0.8013
0.428	0.10488	0.88236	23.4602	0.20266	1.11022e-16	0.79734
0.43	0.10329	0.88625	23.3545	0.20578	0	0.79422
0.432	0.10294	0.88675	23.2498	0.20837	1.11022e-16	0.79163
0.434	0.10281	0.88818	23.146	0.21116	0	0.78884
0.436	0.10232	0.88822	23.0431	0.21336	0	0.78664
0.438	0.10185	0.88928	22.9412	0.21434	0	0.78566
0.44	0.10169	0.88959	22.8401	0.21506	0	0.78494
0.442	0.10173	0.88919	22.7399	0.21789	0	0.78211
0.444	0.10178	0.88896	22.6406	0.2224	1.11022e-16	0.7776
0.446	0.10167	0.8875	22.5422	0.22577	0	0.77423
0.448	0.1014	0.8877	22.4446	0.22846	0	0.77154
0.45	0.10122	0.88842	22.3479	0.23168	0	0.76832
0.452	0.10133	0.88892	22.252	0.23392	0	0.76608
0.454	0.10154	0.88844	22.1569	0.23526	0	0.76474
0.456	0.10208	0.88682	22.0626	0.23737	0	0.76263
0.458	0.10179	0.88729	21.9691	0.24026	0	0.75974
0.46	0.09948	0.89243	21.8764	0.24351	0	0.75649
0.462	0.10016	0.89106	21.7845	0.24643	0	0.75357
0.464	0.10112	0.88876	21.6933	0.24781	0	0.75219
0.466	0.10146	0.88812	21.6029	0.24823	0	0.75177
0.468	0.10159	0.88799	21.5133	0.24885	0	0.75115
0.47	0.10139	0.88839	21.4244	0.24927	0	0.75073
0.472	0.10109	0.88861	21.3362	0.24822	0	0.75178
0.474	0.10122	0.88751	21.2488	0.24633	1.11022e-16	0.75367
0.476	0.10128	0.88705	21.1621	0.24525	0	0.75475
0.478	0.10118	0.88734	21.076	0.24463	0	0.75537
0.48	0.10101	0.88777	20.9907	0.24276	0	0.75724
0.482	0.10059	0.88912	20.9061	0.24016	0	0.75984
0.484	0.10146	0.88669	20.8221	0.23798	0	0.76202
0.486	0.1015	0.88624	20.7388	0.2353	1.11022e-16	0.7647
0.488	0.10082	0.88751	20.6562	0.23145	1.11022e-16	0.76855
0.49	0.10056	0.88797	20.5742	0.22724	0	0.77276
0.492	0.10047	0.88854	20.4929	0.22314	0	0.77686
0.494	0.10041	0.88917	20.4122	0.21925	0	0.78075
0.496	0.10075	0.88767	20.3322	0.21526	0	0.78474
0.498	0.10186	0.88479	20.2528	0.21002	0	0.78998
0.5	0.10113	0.88689	20.174	0.2035	0	0.7965
0.502	0.10054	0.88841	20.0958	0.1972	0	0.8028
0.504	0.10072	0.88846	20.0182	0.19111	0	0.80889
0.506	0.10092	0.88749	19.9412	0.18382	0	0.81618
0.508	0.10075	0.88733	19.8648	0.17588	0	0.82412
0.51	0.10062	0.88785	19.7889	0.16828	0	0.83172
0.512	0.10052	0.88858	19.7137	0.16009	1.11022e-16	0.83991
0.514	0.1007	0.88755	19.639	0.15141	0	0.84859
0.516	0.1005	0.88732	19.5649	0.14286	0	0.85714
0.518	0.10077	0.88699	19.4914	0.13442	0	0.86558
0.52	0.10042	0.88768	19.4184	0.12617	0	0.87383
0.522	0.10016	0.88856	19.3459	0.11727	0	0.88273
0.524	0.10009	0.88871	19.274	0.10733	0	0.89267
0.526	0.10033	0.88813	19.2026	0.09766	0	0.90234
0.528	0.10034	0.88802	19.1318	0.08898	1.11022e-16	0.91102
0.53	0.10003	0.88883	19.0614	0.08078	0	0.91922
0.532	0.09989	0.88919	18.9916	0.07271	0	0.92729
0.534	0.09975	0.88982	18.9223	0.06508	0	0.93492
0.536	0.09975	0.88908	18.8535	0.05786	0	0.94214
0.538	0.09891	0.89058	18.7852	0.05128	0	0.94872
0.54	0.0998	0.88943	18.7173	0.04577	0	0.95423
0.542	0.09983	0.88915	18.65	0.04104	0	0.95896
0.544	0.09966	0.88895	18.5832	0.03675	0	0.96325
0.546	0.10059	0.88667	18.5168	0.03301	0	0.96699
0.548	0.10015	0.88767	18.4509	0.02995	0	0.97005
0.55	0.0999	0.88886	18.3855	0.02754	0	0.97246
0.552	0.09959	0.88992	18.3205	0.02566	0	0.97434
0.554	0.09974	0.8892	18.256	0.02422	0	0.97578
0.556	0.09946	0.88885	18.1919	0.02308	0	0.97692
0.558	0.09961	0.88902	18.1283	0.02234	0	0.97766
0.56	0.09939	0.88919	18.0652	0.02221	0	0.97779
0.562	0.09945	0.88914	18.0024	0.02261	0	0.97739
0.564	0.09942	0.88887	17.9402	0.02319	0	0.97681
0.566	0.0992	0.88888	17.8783	0.02354	0	0.97646
0.568	0.09929	0.88953	17.8169	0.02345	0	0.97655
0.57	0.0994	0.88969	17.7558	0.02338	0	0.97662
0.572	0.09945	0.88981	17.6952	0.02357	0	0.97643
0.574	0.09923	0.89022	17.635	0.02397	0	0.97603
0.576	0.09913	0.89042	17.5753	0.02497	0	0.97503
0.578	0.09892	0.89097	17.5159	0.02634	0	0.97366
0.58	0.09878	0.89174	17.4569	0.02727	0	0.97273
0.582	0.09893	0.89259	17.3983	0.02782	0	0.97218
0.584	0.09846	0.89329	17.3402	0.0285	0	0.9715
0.586	0.09855	0.89244	17.2824	0.02948	0	0.97052
0.588	0.09872	0.89293	17.2249	0.03053	0	0.96947
0.59	0.0995	0.8917	17.1679	0.03135	0	0.96865
0.592	0.09913	0.89285	17.1112	0.03183	0	0.96817
0.594	0.09894	0.89257	17.055	0.03213	0	0.96787
0.596	0.09882	0.89266	16.999	0.03252	0	0.96748
0.598	0.09866	0.89341	16.9435	0.0331	0	0.9669
0.6	0.09868	0.89398	16.8883	0.03385	0	0.96615
0.602	0.09883	0.89412	16.8335	0.03458	0	0.96542
0.604	0.0996	0.89253	16.779	0.03533	0	0.96467
0.606	0.09884	0.89402	16.7249	0.03613	0	0.96387
0.608	0.09887	0.89373	16.6711	0.03685	0	0.96315
0.61	0.09857	0.89566	16.6177	0.03751	0	0.96249
0.612	0.09881	0.89526	16.5646	0.03824	0	0.96176
0.614	0.09889	0.89568	16.5118	0.03879	0	0.96121
0.616	0.09831	0.89627	16.4594	0.0391	0	0.9609
0.618	0.09839	0.89563	16.4073	0.03948	0	0.96052
0.62	0.0983	0.89631	16.3555	0.04004	0	0.95996
0.622	0.09855	0.89683	16.3041	0.04056	0	0.95944
0.624	0.09863	0.89574	16.253	0.04109	0	0.95891
0.626	0.09863	0.89483	16.2022	0.04181	0	0.95819
0.628	0.09849	0.89545	16.1517	0.04252	0	0.95748
0.63	0.09844	0.89631	16.1016	0.0432	0	0.9568
0.632	0.0985	0.897	16.0517	0.04391	0	0.95609
0.634	0.09898	0.89574	16.0022	0.04444	0	0.95556
0.636	0.09871	0.89551	15.9529	0.04478	0	0.95522
0.638	0.09855	0.89687	15.904	0.04522	0	0.95478
0.64	0.09849	0.8978	15.8554	0.04573	0	0.95427
0.642	0.09871	0.89739	15.807	0.0461	0	0.9539
0.644	0.09914	0.89602	15.759	0.04644	0	0.95356
0.646	0.09891	0.89648	15.7112	0.04682	0	0.95318
0.648	0.09891	0.89626	15.6638	0.04708	0	0.95292
0.65	0.09858	0.89805	15.6166	0.04738	0	0.95262
0.652	0.09867	0.89876	15.5697	0.048	0	0.952
0.654	0.09888	0.89781	15.5231	0.04884	0	0.95116
0.656	0.09865	0.89699	15.4767	0.04953	0	0.95047
0.658	0.0985	0.89802	15.4307	0.04997	0	0.95003
0.66	0.09822	0.89885	15.3849	0.05031	0	0.94969
0.662	0.09879	0.89809	15.3394	0.05063	0	0.94937
0.664	0.09875	0.89804	15.2941	0.05106	0	0.94894
0.666	0.09881	0.89767	15.2491	0.05177	0	0.94823
0.668	0.09867	0.8986	15.2044	0.05263	0	0.94737
0.67	0.10008	0.89632	15.16	0.05318	0	0.94682
0.672	0.09897	0.89878	15.1158	0.05329	0	0.94671
0.674	0.09904	0.89707	15.0718	0.05346	0	0.94654
0.676	0.09962	0.89465	15.0281	0.05381	0	0.94619
0.678	0.09905	0.8968	14.9847	0.05401	0	0.94599
0.68	0.0984	0.89798	14.9415	0.05428	0	0.94572
0.682	0.09878	0.89815	14.8986	0.0549	0	0.9451
0.684	0.10017	0.89577	14.8559	0.05542	0	0.94458
0.686	0.09912	0.89794	14.8134	0.05588	0	0.94412
0.688	0.09907	0.89807	14.7712	0.05651	0	0.94349
0.69	0.09905	0.8995	14.7293	0.05734	0	0.94266
0.692	0.09903	0.90002	14.6875	0.05802	0	0.94198
0.694	0.09875	0.90111	14.6461	0.05827	0	0.94173
0.696	0.09898	0.89988	14.6048	0.05841	0	0.94159
0.698	0.09902	0.89972	14.5638	0.05881	0	0.94119
0.7	0.09916	0.89891	14.523	0.05925	0	0.94075
0.702	0.09928	0.89994	14.4824	0.05962	0	0.94038
0.704	0.09908	0.90005	14.4421	0.06018	0	0.93982
0.706	0.09906	0.90068	14.402	0.06092	0	0.93908
0.708	0.09927	0.90047	14.3621	0.06143	0	0.93857
0.71	0.09908	0.90042	14.3224	0.06169	0	0.93831
0.712	0.09912	0.9001	14.2829	0.06213	0	0.93787
0.714	0.09907	0.90046	14.2437	0.06291	0	0.93709
0.716	0.10039	0.89822	14.2047	0.06356	1.11022e-16	0.93644
0.718	0.09964	0.90024	14.1659	0.0639	0	0.9361
0.72	0.09955	0.8996	14.1273	0.06424	0	0.93576
0.722	0.09938	0.89978	14.0889	0.06476	0	0.93524
0.724	0.0992	0.90031	14.0507	0.06536	0	0.93464
0.726	0.09919	0.90058	14.0127	0.06598	0	0.93402
0.728	0.09918	0.90038	13.9749	0.0666	0	0.9334
0.73	0.0996	0.89955	13.9374	0.06727	1.11022e-16	0.93273
0.732	0.10035	0.89933	13.9	0.06798	0	0.93202
0.734	0.09914	0.90052	13.8628	0.06869	0	0.93131
0.736	0.09915	0.89986	13.8259	0.06948	0	0.93052
0.738	0.09951	0.89855	13.7891	0.07026	0	0.92974
0.74	0.09969	0.89967	13.7525	0.07079	0	0.92921
0.742	0.0997	0.89929	13.7162	0.07118	0	0.92882
0.744	0.09958	0.8975	13.68	0.07173	0	0.92827
0.746	0.09945	0.89776	13.644	0.0724	0	0.9276
0.748	0.09951	0.89832	13.6082	0.07301	0	0.92699
0.75	0.09952	0.89785	13.5725	0.07344	0	0.92656
0.752	0.09953	0.89713	13.5371	0.07377	0	0.92623
0.754	0.09945	0.89766	13.5018	0.07431	0	0.92569
0.756	0.09949	0.89683	13.4668	0.0751	0	0.9249
0.758	0.10127	0.89631	13.4319	0.07592	0	0.92408
0.76	0.10084	0.89696	13.3972	0.07669	0	0.92331
0.762	0.10005	0.89673	13.3626	0.07742	0	0.92258
0.764	0.09946	0.89695	13.3283	0.07815	1.11022e-16	0.92185
0.766	0.09962	0.89748	13.2941	0.07877	0	0.92123
0.768	0.09983	0.89664	13.2601	0.07915	0	0.92085
0.77	0.10011	0.89576	13.2263	0.07942	0	0.92058
0.772	0.09985	0.89579	13.1926	0.07969	0	0.92031
0.774	0.10001	0.89601	13.1592	0.08001	0	0.91999
0.776	0.0996	0.89596	13.1258	0.08033	0	0.91967
0.778	0.09977	0.89549	13.0927	0.08044	0	0.91956
0.78	0.1004	0.89461	13.0597	0.08033	0	0.91967
0.782	0.10053	0.89411	13.0269	0.08024	0	0.91976
0.784	0.10032	0.89457	12.9942	0.08012	0	0.91988
0.786	0.10004	0.89459	12.9618	0.07988	0	0.92012
0.788	0.0999	0.8945	12.9294	0.07966	0	0.92034
0.79	0.10017	0.89385	12.8973	0.07942	0	0.92058
0.792	0.10049	0.89366	12.8653	0.07894	0	0.92106
0.794	0.10096	0.89344	12.8334	0.07824	0	0.92176
0.796	0.10042	0.89331	12.8017	0.07742	0	0.92258
0.798	0.10047	0.89347	12.7702	0.07665	0	0.92335
0.8	0.10073	0.89291	12.7388	0.07596	0	0.92404
0.802	0.10112	0.89333	12.7076	0.07523	0	0.92477
0.804	0.10052	0.89363	12.6765	0.07441	0	0.92559
0.806	0.10051	0.89304	12.6456	0.0735	0	0.9265
0.808	0.10056	0.89262	12.6149	0.07266	0	0.92734
0.81	0.09987	0.89296	12.5842	0.07196	0	0.92804
0.812	0.10036	0.8936	12.5538	0.07127	0	0.92873
0.814	0.10079	0.8933	12.5234	0.07052	0	0.92948
0.816	0.1003	0.89369	12.4933	0.06972	0	0.93028
0.818	0.10007	0.8926	12.4632	0.06889	0	0.93111
0.82	0.1007	0.89247	12.4334	0.06831	0	0.93169
0.822	0.09997	0.89183	12.4036	0.06798	0	0.93202
0.824	0.09983	0.89201	12.374	0.06753	0	0.93247
0.826	0.10038	0.89191	12.3445	0.06704	0	0.93296
0.828	0.09991	0.89224	12.3152	0.06683	0	0.93317
0.83	0.09954	0.89135	12.286	0.06678	1.11022e-16	0.93322
0.832	0.0993	0.89115	12.257	0.06673	0	0.93327
0.834	0.09774	0.89089	12.2281	0.06672	0	0.93328
0.836	0.09995	0.89097	12.1993	0.06682	0	0.93318
0.838	0.09977	0.8906	12.1707	0.06714	0	0.93286
0.84	0.09889	0.89088	12.1422	0.06767	0	0.93233
0.842	0.09928	0.8907	12.1138	0.06825	0	0.93175
0.844	0.09943	0.89091	12.0856	0.06885	0	0.93115
0.846	0.09946	0.89044	12.0574	0.06959	0	0.93041
0.848	0.09893	0.88943	12.0295	0.07051	0	0.92949
0.85	0.09866	0.88834	12.0016	0.07157	0	0.92843
0.852	0.09883	0.88948	11.9739	0.07278	0	0.92722
0.854	0.0984	0.88915	11.9463	0.07411	0	0.92589
0.856	0.09873	0.89	11.9189	0.07564	0	0.92436
0.858	0.09908	0.88911	11.8915	0.07738	0	0.92262
0.86	0.09869	0.88833	11.8643	0.07906	0	0.92094
0.862	0.09914	0.88862	11.8372	0.08054	1.11022e-16	0.91946
0.864	0.0992	0.88942	11.8103	0.08199	0	0.91801
0.866	0.09678	0.88907	11.7834	0.08349	0	0.91651
0.868	0.09597	0.88834	11.7567	0.08514	0	0.91486
0.87	0.09605	0.88882	11.7301	0.08693	0	0.91307
0.872	0.09672	0.88745	11.7036	0.0887	0	0.9113
0.874	0.09665	0.88978	11.6773	0.09031	0	0.90969
0.876	0.09798	0.88702	11.651	0.09175	0	0.90825
0.878	0.09687	0.88835	11.6249	0.09314	0	0.90686
0.88	0.09644	0.88777	11.5989	0.09463	0	0.90537
0.882	0.09634	0.88905	11.573	0.09625	0	0.90375
0.884	0.09563	0.88749	11.5472	0.09794	0	0.90206
0.886	0.09602	0.88977	11.5216	0.09972	0	0.90028
0.888	0.09663	0.88887	11.496	0.10161	0	0.89839
0.89	0.09585	0.88485	11.4706	0.1035	0	0.8965
0.892	0.09456	0.88606	11.4453	0.10528	0	0.89472
0.894	0.0943	0.88929	11.4201	0.10704	0	0.89296
0.896	0.09505	0.8877	11.395	0.10883	0	0.89117
0.898	0.09556	0.88549	11.37	0.11059	0	0.88941
0.9	0.09496	0.88267	11.3451	0.11239	0	0.88761
0.902	0.0941	0.88248	11.3203	0.11441	0	0.88559
0.904	0.0935	0.88222	11.2957	0.11665	0	0.88335
0.906	0.09333	0.88197	11.2711	0.11889	1.11022e-16	0.88111
0.908	0.09448	0.88177	11.2467	0.12112	0	0.87888
0.91	0.09486	0.88135	11.2223	0.12344	0	0.87656
0.912	0.09453	0.8814	11.1981	0.12576	0	0.87424
0.914	0.09418	0.88146	11.1739	0.12797	0	0.87203
0.916	0.09281	0.88161	11.1499	0.13018	0	0.86982
0.918	0.09213	0.88114	11.126	0.1325	1.11022e-16	0.8675
0.92	0.09244	0.88127	11.1021	0.13487	0	0.86513
0.922	0.0922	0.88104	11.0784	0.1373	0	0.8627
0.924	0.09196	0.88092	11.0548	0.13983	0	0.86017
0.926	0.0913	0.88115	11.0313	0.1423	0	0.8577
0.928	0.09265	0.88091	11.0079	0.1446	1.11022e-16	0.8554
0.93	0.09266	0.88051	10.9846	0.14684	0	0.85316
0.932	0.09221	0.88034	10.9613	0.14905	0	0.85095
0.934	0.09103	0.87997	10.9382	0.15122	0	0.84878
0.936	0.09148	0.88004	10.9152	0.15345	0	0.84655
0.938	0.09147	0.88033	10.8922	0.15575	0	0.84425
0.94	0.09189	0.88002	10.8694	0.15806	0	0.84194
0.942	0.09102	0.87998	10.8467	0.16034	0	0.83966
0.944	0.08997	0.87992	10.824	0.16241	1.11022e-16	0.83759
0.946	0.09046	0.87985	10.8015	0.16436	1.11022e-16	0.83564
0.948	0.09071	0.87984	10.779	0.16647	0	0.83353
0.95	0.09074	0.8797	10.7567	0.16871	0	0.83129
0.952	0.0906	0.87895	10.7344	0.17086	0	0.82914
0.954	0.09169	0.87901	10.7122	0.17291	0	0.82709
0.956	0.09241	0.87934	10.6901	0.17492	0	0.82508
0.958	0.09064	0.87956	10.6681	0.17689	0	0.82311
0.96	0.08921	0.87962	10.6462	0.17873	0	0.82127
0.962	0.08938	0.87958	10.6244	0.1804	0	0.8196
0.964	0.09016	0.87845	10.6027	0.18203	0	0.81797
0.966	0.09065	0.87931	10.581	0.18386	0	0.81614
0.968	0.0918	0.87887	10.5595	0.18582	0	0.81418
0.97	0.09067	0.8792	10.538	0.18758	0	0.81242
0.972	0.08945	0.87892	10.5166	0.18917	1.11022e-16	0.81083
0.974	0.08984	0.87868	10.4954	0.1909	0	0.8091
0.976	0.09003	0.87882	10.4741	0.19277	0	0.80723
0.978	0.08924	0.87785	10.453	0.19458	0	0.80542
0.98	0.08829	0.8792	10.432	0.19625	0	0.80375
0.982	0.08906	0.8788	10.411	0.19788	1.11022e-16	0.80212
0.984	0.08979	0.87847	10.3902	0.19959	1.11022e-16	0.80041
0.986	0.08945	0.87905	10.3694	0.20146	0	0.79854
0.988	0.08884	0.87913	10.3487	0.20339	0	0.79661
0.99	0.08991	0.87772	10.3281	0.20524	0	0.79476
0.992	0.08995	0.87949	10.3076	0.20706	0	0.79294
0.994	0.08861	0.8788	10.2871	0.20893	1.11022e-16	0.79107
0.996	0.08898	0.87888	10.2667	0.21085	0	0.78915
0.998	0.08877	0.87883	10.2464	0.21276	1.11022e-16	0.78724
1	0.08808	0.87793	10.2262	0.2145	0	0.7855
1.002	0.08962	0.87924	10.2061	0.21618	0	0.78382
1.004	0.08992	0.87906	10.1861	0.21808	0	0.78192
1.006	0.08837	0.879	10.1661	0.22011	0	0.77989
1.008	0.08774	0.87908	10.1462	0.22212	0	0.77788
1.01	0.08872	0.87869	10.1264	0.22414	0	0.77586
1.012	0.08975	0.87864	10.1066	0.22616	0	0.77384
1.014	0.0884	0.87878	10.087	0.22811	0	0.77189
1.016	0.08692	0.87831	10.0674	0.23006	1.11022e-16	0.76994
1.018	0.08868	0.87778	10.0479	0.23212	0	0.76788
1.02	0.08884	0.87942	10.0284	0.2343	0	0.7657
1.022	0.08831	0.87975	10.0091	0.23658	0	0.76342
1.024	0.08797	0.87786	9.9898	0.23885	0	0.76115
1.026	0.08816	0.87761	9.97059	0.24096	1.11022e-16	0.75904
1.028	0.08823	0.87906	9.95145	0.24303	0	0.75697
1.03	0.08917	0.87844	9.93239	0.24518	0	0.75482
1.032	0.08773	0.87846	9.91339	0.24741	0	0.75259
1.034	0.08704	0.87782	9.89448	0.24978	0	0.75022
1.036	0.08755	0.87708	9.87563	0.25217	0	0.74783
1.038	0.08848	0.8783	9.85685	0.25446	0	0.74554
1.04	0.08924	0.87801	9.83815	0.2567	1.11022e-16	0.7433
1.042	0.08849	0.87885	9.81952	0.25896	1.11022e-16	0.74104
1.044	0.08846	0.87737	9.80096	0.26125	0	0.73875
1.046	0.08898	0.87728	9.78246	0.26357	1.11022e-16	0.73643
1.048	0.08757	0.87895	9.76404	0.26596	0	0.73404
1.05	0.08754	0.87841	9.74569	0.26841	0	0.73159
1.052	0.08852	0.87817	9.7274	0.27084	0	0.72916
1.054	0.088	0.87839	9.70919	0.27322	0	0.72678
1.056	0.08698	0.87869	9.69104	0.27556	0	0.72444
1.058	0.08718	0.87863	9.67296	0.27786	0	0.72214
1.06	0.08747	0.8784	9.65494	0.28008	0	0.71992
1.062	0.08782	0.87841	9.637	0.28222	0	0.71778
1.064	0.08683	0.8785	9.61912	0.28431	1.11022e-16	0.71569
1.066	0.08685	0.87847	9.60131	0.28624	0	0.71376
1.068	0.08612	0.87793	9.58356	0.28805	1.11022e-16	0.71195
1.07	0.08758	0.87736	9.56588	0.28985	1.11022e-16	0.71015
1.072	0.08785	0.87897	9.54826	0.29154	0	0.70846
1.074	0.08883	0.87829	9.53071	0.293	1.11022e-16	0.707
1.076	0.08824	0.87839	9.51322	0.29427	0	0.70573
1.078	0.08745	0.87816	9.4958	0.29533	0	0.70467
1.08	0.08708	0.87812	9.47844	0.29616	0	0.70384
1.082	0.08777	0.87726	9.46114	0.29677	0	0.70323
1.084	0.08638	0.87778	9.44391	0.297	1.11022e-16	0.703
1.086	0.08708	0.87891	9.42674	0.29693	0	0.70307
1.088	0.08781	0.87952	9.40963	0.29667	0	0.70333
1.09	0.08678	0.87849	9.39258	0.29621	0	0.70379
1.092	0.08734	0.87847	9.3756	0.2954	0	0.7046
1.094	0.08847	0.87798	9.35867	0.29414	1.11022e-16	0.70586
1.096	0.0873	0.87911	9.34181	0.29247	0	0.70753
1.098	0.0864	0.87869	9.32501	0.29043	0	0.70957
1.1	0.0862	0.87865	9.30827	0.28805	1.11022e-16	0.71195
1.102	0.08511	0.87868	9.29159	0.28539	0	0.71461
1.104	0.08511	0.87866	9.27496	0.28257	0	0.71743
1.106	0.08521	0.8786	9.2584	0.27953	1.11022e-16	0.72047
1.108	0.08582	0.87844	9.2419	0.27603	0	0.72397
1.11	0.08689	0.87847	9.22545	0.27213	0	0.72787
1.112	0.08662	0.87871	9.20907	0.26815	0	0.73185
1.114	0.08661	0.87842	9.19274	0.26419	1.11022e-16	0.73581
1.116	0.08768	0.87726	9.17647	0.26003	0	0.73997
1.118	0.08692	0.87795	9.16026	0.25556	0	0.74444
1.12	0.08706	0.87869	9.1441	0.25096	1.11022e-16	0.74904
1.122	0.0869	0.87881	9.128	0.24641	0	0.75359
1.124	0.08736	0.87832	9.11196	0.24197	0	0.75803
1.126	0.08726	0.87763	9.09597	0.23757	1.11022e-16	0.76243
1.128	0.08711	0.87912	9.08004	0.2332	0	0.7668
1.13	0.08706	0.87863	9.06417	0.22896	0	0.77104
1.132	0.08649	0.87824	9.04835	0.22483	0	0.77517
1.134	0.08613	0.87825	9.03259	0.22068	0	0.77932
1.136	0.08583	0.8783	9.01688	0.21662	0	0.78338
1.138	0.08637	0.87849	9.00122	0.21273	0	0.78727
1.14	0.08779	0.87879	8.98562	0.2089	0	0.7911
1.142	0.08716	0.87854	8.97008	0.20513	0	0.79487
1.144	0.08716	0.87866	8.95459	0.20154	0	0.79846
1.146	0.08674	0.87877	8.93915	0.1981	1.11022e-16	0.8019
1.148	0.08662	0.8784	8.92376	0.19476	0	0.80524
1.15	0.08718	0.87796	8.90843	0.19158	0	0.80842
1.152	0.08817	0.87927	8.89315	0.18862	0	0.81138
1.154	0.08768	0.879	8.87792	0.18564	0	0.81436
1.156	0.08726	0.87913	8.86274	0.18255	0	0.81745
1.158	0.08664	0.87894	8.84762	0.17963	0	0.82037
1.16	0.08612	0.87886	8.83255	0.1769	1.11022e-16	0.8231
1.162	0.08636	0.87892	8.81753	0.17409	0	0.82591
1.164	0.08666	0.87905	8.80256	0.17117	0	0.82883
1.166	0.08577	0.87892	8.78764	0.16829	0	0.83171
1.168	0.08547	0.87852	8.77277	0.16548	0	0.83452
1.17	0.08484	0.87784	8.75795	0.16274	0	0.83726
1.172	0.08401	0.87886	8.74318	0.15995	0	0.84005
1.174	0.08304	0.87947	8.72846	0.15714	1.11022e-16	0.84286
1.176	0.08251	0.87901	8.71379	0.15442	0	0.84558
1.178	0.08307	0.87913	8.69917	0.15178	0	0.84822
1.18	0.08453	0.87926	8.6846	0.14902	0	0.85098
1.182	0.08519	0.8793	8.67008	0.14611	0	0.85389
1.184	0.08511	0.87969	8.6556	0.14318	0	0.85682
1.186	0.08484	0.87975	8.64118	0.14032	0	0.85968
1.188	0.08532	0.87917	8.6268	0.13752	0	0.86248
1.19	0.08727	0.87866	8.61247	0.13463	0	0.86537
1.192	0.08686	0.879	8.59818	0.13158	0	0.86842
1.194	0.08667	0.87887	8.58395	0.12847	0	0.87153
1.196	0.08675	0.87984	8.56976	0.12538	0	0.87462
1.198	0.08644	0.8798	8.55562	0.12231	0	0.87769
1.2	0.08702	0.87951	8.54152	0.11928	0	0.88072
1.202	0.08832	0.87903	8.52748	0.11626	0	0.88374
1.204	0.08821	0.87931	8.51347	0.1131	0	0.8869
1.206	0.08797	0.87916	8.49952	0.10987	0	0.89013
1.208	0.0878	0.8795	8.48561	0.1067	0	0.8933
1.21	0.08754	0.87958	8.47174	0.10352	1.11022e-16	0.89648
1.212	0.08778	0.87924	8.45792	0.10019	0	0.89981
1.214	0.08759	0.87908	8.44415	0.09679	0	0.90321
1.216	0.0873	0.87923	8.43042	0.09343	0	0.90657
1.218	0.08758	0.87948	8.41673	0.09015	0	0.90985
1.22	0.08702	0.87972	8.40309	0.08687	0	0.91313
1.222	0.08653	0.88011	8.38949	0.08352	0	0.91648
1.224	0.08652	0.87994	8.37594	0.08011	0	0.91989
1.226	0.08611	0.88005	8.36243	0.07669	0	0.92331
1.228	0.08671	0.8801	8.34896	0.07327	0	0.92673
1.23	0.08676	0.87989	8.33554	0.0698	0	0.9302
1.232	0.08625	0.8801	8.32216	0.06631	0	0.93369
1.234	0.08626	0.87989	8.30882	0.06288	0	0.93712
1.236	0.08624	0.88015	8.29553	0.05948	0	0.94052
1.238	0.08601	0.88002	8.28228	0.056	0	0.944
1.24	0.08646	0.8803	8.26907	0.05247	0	0.94753
1.242	0.08647	0.8802	8.2559	0.04904	0	0.95096
1.244	0.0861	0.88051	8.24277	0.04575	0	0.95425
1.246	0.08617	0.88035	8.22969	0.04247	0	0.95753
1.248	0.08628	0.8805	8.21665	0.03917	0	0.96083
1.25	0.08647	0.88036	8.20365	0.03592	0	0.96408
1.252	0.08672	0.88041	8.19069	0.03281	0	0.96719
1.254	0.0865	0.88072	8.17777	0.02982	0	0.97018
1.256	0.08638	0.881	8.16489	0.02694	0	0.97306
1.258	0.0859	0.88144	8.15205	0.02422	0	0.97578
1.26	0.08591	0.8815	8.13925	0.02173	0	0.97827
1.262	0.08634	0.88163	8.1265	0.01943	0	0.98057
1.264	0.08594	0.8818	8.11378	0.01724	0	0.98276
1.266	0.08584	0.88076	8.1011	0.01517	0	0.98483
1.268	0.0862	0.88075	8.08846	0.01328	0	0.98672
1.27	0.08583	0.88095	8.07586	0.01161	0	0.98839
1.272	0.08581	0.8816	8.06331	0.01008	0	0.98992
1.274	0.0862	0.88159	8.05078	0.00869	0	0.99131
1.276	0.08613	0.88163	8.0383	0.00749	0	0.99251
1.278	0.0859	0.88174	8.02586	0.00647	0	0.99353
1.28	0.08607	0.88189	8.01345	0.00555	0	0.99445
1.282	0.08626	0.8817	8.00109	0.00469	0	0.99531
1.284	0.08639	0.88192	7.98876	0.00389	0	0.99611
1.286	0.08638	0.88188	7.97647	0.00321	0	0.99679
1.288	0.08663	0.88195	7.96422	0.00267	0	0.99733
1.29	0.08659	0.88204	7.952	0.0022	0	0.9978
1.292	0.0864	0.88241	7.93982	0.00175	0	0.99825
1.294	0.08668	0.88217	7.92768	0.00137	0	0.99863
1.296	0.08665	0.88229	7.91558	0.00109	0	0.99891
1.298	0.08666	0.88242	7.90351	0.0009	0	0.9991
1.3	0.08683	0.88285	7.89148	0.00077	0	0.99923
1.302	0.08653	0.88267	7.87949	0.00064	0	0.99936
1.304	0.08675	0.8826	7.86753	0.00046	0	0.99954
1.306	0.0873	0.88273	7.85561	0.00031	0	0.99969
1.308	0.08714	0.88294	7.84373	0.00028	0	0.99972
1.31	0.08713	0.88282	7.83188	0.00031	0	0.99969
1.312	0.08763	0.88257	7.82007	0.00029	0	0.99971
1.314	0.08771	0.88267	7.80829	0.00031	0	0.99969
1.316	0.08833	0.88351	7.79655	0.00037	0	0.99963
1.318	0.08887	0.88375	7.78484	0.00041	0	0.99959
1.32	0.08837	0.88426	7.77317	0.00045	0	0.99955
1.322	0.08742	0.8843	7.76153	0.00052	0	0.99948
1.324	0.08613	0.88458	7.74993	0.00061	0	0.99939
1.326	0.08603	0.88426	7.73837	0.0007	0	0.9993
1.328	0.08621	0.88325	7.72683	0.00082	0	0.99918
1.33	0.08673	0.88323	7.71534	0.00097	0	0.99903
1.332	0.08735	0.88362	7.70387	0.00116	0	0.99884
1.334	0.08793	0.88378	7.69244	0.00135	0	0.99865
1.336	0.08728	0.8841	7.68104	0.0015	0	0.9985
1.338	0.08491	0.88396	7.66968	0.0016	0	0.9984
1.34	0.08453	0.88397	7.65835	0.0017	0	0.9983
1.342	0.08584	0.88378	7.64706	0.00189	0	0.99811
1.344	0.08518	0.88366	7.6358	0.00212	0	0.99788
1.346	0.08418	0.8838	7.62457	0.00229	0	0.99771
1.348	0.0862	0.88421	7.61337	0.00243	0	0.99757
1.35	0.08635	0.88449	7.60221	0.00259	0	0.99741
1.352	0.08464	0.8847	7.59108	0.00279	0	0.99721
1.354	0.08597	0.8848	7.57998	0.00305	0	0.99695
1.356	0.09051	0.88538	7.56891	0.00335	0	0.99665
1.358	0.09508	0.88674	7.55788	0.00359	0	0.99641
1.36	0.09385	0.88691	7.54688	0.0038	0	0.9962
1.362	0.08597	0.88529	7.53591	0.004	0	0.996
1.364	0.07906	0.88446	7.52497	0.00416	0	0.99584
1.366	0.07744	0.88414	7.51407	0.00429	0	0.99571
1.368	0.08316	0.88482	7.50319	0.00441	0	0.99559
1.37	0.09048	0.88551	7.49235	0.0045	0	0.9955
1.372	0.09106	0.88607	7.48154	0.00466	0	0.99534
1.374	0.08788	0.88498	7.47076	0.00496	0	0.99504
1.376	0.08565	0.88474	7.46001	0.0053	0	0.9947
1.378	0.08417	0.88547	7.44929	0.00552	0	0.99448
1.38	0.08477	0.88437	7.4386	0.00565	0	0.99435
1.382	0.08752	0.88413	7.42794	0.00574	0	0.99426
1.384	0.08832	0.88428	7.41732	0.00587	0	0.99413
1.386	0.08705	0.88391	7.40672	0.00604	0	0.99396
1.388	0.08742	0.88341	7.39616	0.00626	0	0.99374
1.39	0.08605	0.88324	7.38562	0.00645	0	0.99355
1.392	0.08552	0.88322	7.37511	0.00658	0	0.99342
1.394	0.08789	0.88329	7.36464	0.00672	0	0.99328
1.396	0.08769	0.8831	7.35419	0.00693	0	0.99307
1.398	0.08608	0.8832	7.34378	0.0072	0	0.9928
1.4	0.08534	0.88325	7.33339	0.00745	0	0.99255
1.402	0.08498	0.88288	7.32303	0.00759	0	0.99241
1.404	0.08502	0.88331	7.3127	0.00771	0	0.99229
1.406	0.08614	0.88404	7.3024	0.00786	0	0.99214
1.408	0.08708	0.88421	7.29213	0.00799	0	0.99201
1.41	0.08626	0.88427	7.28189	0.00808	0	0.99192
1.412	0.08609	0.88477	7.27168	0.00822	0	0.99178
1.414	0.08607	0.8854	7.26149	0.0084	0	0.9916
1.416	0.08644	0.88533	7.25134	0.00852	0	0.99148
1.418	0.08703	0.88473	7.24121	0.00862	0	0.99138
1.42	0.08726	0.88504	7.23111	0.00874	0	0.99126
1.422	0.08754	0.88501	7.22104	0.00889	0	0.99111
1.424	0.08801	0.88514	7.21099	0.00908	0	0.99092
1.426	0.08788	0.88541	7.20098	0.00924	0	0.99076
1.428	0.0867	0.88578	7.19099	0.00933	0	0.99067
1.43	0.08565	0.88595	7.18103	0.00945	0	0.99055
1.432	0.0858	0.8861	7.1711	0.00966	0	0.99034
1.434	0.08592	0.88653	7.1612	0.00986	0	0.99014
1.436	0.08619	0.88654	7.15132	0.01001	0	0.98999
1.438	0.08642	0.88669	7.14147	0.01016	0	0.98984
1.44	0.08653	0.88692	7.13164	0.01031	0	0.98969
1.442	0.08648	0.88696	7.12185	0.01048	0	0.98952
1.444	0.08666	0.88763	7.11208	0.01067	0	0.98933
1.446	0.08679	0.88817	7.10234	0.01081	0	0.98919
1.448	0.08698	0.88762	7.09262	0.01092	0	0.98908
1.45	0.08619	0.88769	7.08293	0.01104	0	0.98896
1.452	0.08567	0.88762	7.07327	0.01119	0	0.98881
1.454	0.08614	0.88805	7.06363	0.01134	0	0.98866
1.456	0.08654	0.88894	7.05402	0.01146	0	0.98854
1.458	0.08728	0.88933	7.04444	0.01153	0	0.98847
1.46	0.08725	0.88925	7.03488	0.01162	0	0.98838
1.462	0.0865	0.88855	7.02535	0.01178	0	0.98822
1.464	0.08588	0.88856	7.01584	0.01194	0	0.98806
1.466	0.08571	0.88885	7.00636	0.01204	0	0.98796
1.468	0.08579	0.88858	6.9969	0.01214	0	0.98786
1.47	0.08599	0.88883	6.98747	0.0123	0	0.9877
1.472	0.08639	0.89005	6.97807	0.01243	0	0.98757
1.474	0.08635	0.88995	6.96869	0.01254	0	0.98746
1.476	0.08679	0.88933	6.95934	0.01271	0	0.98729
1.478	0.08723	0.88967	6.95001	0.01286	0	0.98714
1.48	0.08715	0.88983	6.9407	0.01298	0	0.98702
1.482	0.08652	0.89024	6.93142	0.01312	0	0.98688
1.484	0.08588	0.89082	6.92217	0.01323	0	0.98677
1.486	0.08591	0.89059	6.91294	0.01333	0	0.98667
1.488	0.0864	0.89016	6.90374	0.01346	0	0.98654
1.49	0.08709	0.89027	6.89455	0.0136	0	0.9864
1.492	0.08712	0.89005	6.8854	0.01369	0	0.98631
1.494	0.08703	0.89041	6.87627	0.01376	0	0.98624
1.496	0.08646	0.8914	6.86716	0.01392	0	0.98608
1.498	0.08581	0.89101	6.85808	0.01414	0	0.98586
1.5	0.08607	0.89037	6.84902	0.01418	0	0.98582
1.502	0.08642	0.89073	6.83998	0.01419	0	0.98581
1.504	0.08649	0.89099	6.83097	0.01427	0	0.98573
1.506	0.08702	0.89067	6.82198	0.01442	0	0.98558
1.508	0.0873	0.89134	6.81302	0.01458	0	0.98542
1.51	0.08602	0.89215	6.80408	0.01469	0	0.98531
1.512	0.08559	0.89166	6.79516	0.01481	0	0.98519
1.514	0.08622	0.89153	6.78626	0.01499	0	0.98501
1.516	0.08615	0.89162	6.77739	0.01521	0	0.98479
1.518	0.08669	0.89167	6.76854	0.01537	0	0.98463
1.52	0.08744	0.89152	6.75972	0.01547	0	0.98453
1.522	0.08733	0.89231	6.75092	0.01554	0	0.98446
1.524	0.08663	0.89245	6.74214	0.01562	0	0.98438
1.526	0.08618	0.89154	6.73338	0.01568	0	0.98432
1.528	0.08626	0.89146	6.72465	0.01576	0	0.98424
1.53	0.08675	0.8916	6.71594	0.01592	0	0.98408
1.532	0.08733	0.89207	6.70725	0.01616	0	0.98384
1.534	0.087	0.893	6.69859	0.01631	0	0.98369
1.536	0.08625	0.89305	6.68994	0.01637	0	0.98363
1.538	0.086	0.8923	6.68132	0.01643	0	0.98357
1.54	0.08637	0.89246	6.67272	0.01655	0	0.98345
1.542	0.08648	0.8925	6.66415	0.01668	0	0.98332
1.544	0.08703	0.89224	6.65559	0.01671	0	0.98329
1.546	0.08718	0.89289	6.64706	0.01666	0	0.98334
1.548	0.08701	0.89379	6.63855	0.01675	0	0.98325
1.55	0.08652	0.89351	6.63006	0.01714	0	0.98286
1.552	0.08592	0.89285	6.62159	0.01738	0	0.98262
1.554	0.08626	0.8931	6.61314	0.01747	0	0.98253
1.556	0.08696	0.89293	6.60472	0.01756	0	0.98244
1.558	0.08734	0.89242	6.59632	0.01766	0	0.98234
1.56	0.0874	0.89324	6.58794	0.01774	0	0.98226
1.562	0.08737	0.89423	6.57958	0.0178	0	0.9822
1.564	0.08655	0.89386	6.57124	0.01791	0	0.98209
1.566	0.08593	0.89339	6.56292	0.01809	0	0.98191
1.568	0.08618	0.8935	6.55462	0.01823	0	0.98177
1.57	0.08652	0.89315	6.54635	0.01832	0	0.98168
1.572	0.08667	0.89285	6.53809	0.01836	0	0.98164
1.574	0.087	0.89375	6.52986	0.01839	0	0.98161
1.576	0.08713	0.89477	6.52164	0.01847	0	0.98153
1.578	0.08618	0.89407	6.51345	0.01858	0	0.98142
1.58	0.08552	0.89333	6.50528	0.01867	0	0.98133
1.582	0.08578	0.89356	6.49712	0.01881	0	0.98119
1.584	0.08617	0.89362	6.48899	0.01893	0	0.98107
1.586	0.08675	0.8937	6.48088	0.01903	0	0.98097
1.588	0.08725	0.89323	6.47279	0.01925	0	0.98075
1.59	0.08744	0.89358	6.46472	0.01941	0	0.98059
1.592	0.08763	0.89473	6.45667	0.01945	0	0.98055
1.594	0.08756	0.89441	6.44864	0.01947	0	0.98053
1.596	0.08659	0.89352	6.44063	0.01958	0	0.98042
1.598	0.08576	0.89342	6.43264	0.01975	0	0.98025
1.6	0.08606	0.89367	6.42467	0.01985	0	0.98015
1.602	0.08657	0.89366	6.41671	0.01985	0	0.98015
1.604	0.0869	0.89326	6.40878	0.01988	0	0.98012
1.606	0.08703	0.89362	6.40087	0.02	0	0.98
1.608	0.08709	0.89452	6.39298	0.02012	0	0.97988
1.61	0.08714	0.89419	6.38511	0.02021	0	0.97979
1.612	0.0865	0.89368	6.37725	0.02026	0	0.97974
1.614	0.08612	0.89362	6.36942	0.02034	0	0.97966
1.616	0.08647	0.89356	6.3616	0.02043	0	0.97957
1.618	0.08673	0.89331	6.35381	0.02049	0	0.97951
1.62	0.08702	0.89379	6.34603	0.02058	0	0.97942
1.622	0.08755	0.89472	6.33827	0.02073	0	0.97927
1.624	0.08799	0.89432	6.33053	0.02084	0	0.97916
1.626	0.08796	0.89358	6.32281	0.02095	0	0.97905
1.628	0.08709	0.89344	6.31511	0.02108	0	0.97892
1.63	0.08671	0.89348	6.30743	0.0212	0	0.9788
1.632	0.087	0.89352	6.29976	0.02123	0	0.97877
1.634	0.08699	0.89323	6.29212	0.02123	0	0.97877
1.636	0.08725	0.8938	6.28449	0.02129	0	0.97871
1.638	0.08736	0.89479	6.27688	0.02141	0	0.97859
1.64	0.08727	0.89437	6.26929	0.02152	0	0.97848
1.642	0.08628	0.89358	6.26172	0.02161	0	0.97839
1.644	0.08523	0.89348	6.25417	0.02167	0	0.97833
1.646	0.08505	0.89342	6.24663	0.02173	0	0.97827
1.648	0.08516	0.89338	6.23912	0.02179	0	0.97821
1.65	0.085	0.89425	6.23162	0.02185	0	0.97815
1.652	0.08517	0.89395	6.22414	0.02194	0	0.97806
1.654	0.08508	0.89318	6.21667	0.02206	0	0.97794
1.656	0.0839	0.89318	6.20923	0.02218	0	0.97782
1.658	0.08324	0.89305	6.2018	0.02228	0	0.97772
1.66	0.08393	0.89328	6.19439	0.02232	0	0.97768
1.662	0.08483	0.89284	6.187	0.02235	0	0.97765
1.664	0.0855	0.8931	6.17962	0.02241	0	0.97759
1.666	0.08576	0.89413	6.17227	0.02247	0	0.97753
1.668	0.08559	0.8938	6.16493	0.02253	0	0.97747
1.67	0.08592	0.89302	6.15761	0.02259	0	0.97741
1.672	0.08653	0.8937	6.1503	0.02264	0	0.97736
1.674	0.08645	0.89365	6.14302	0.02271	0	0.97729
1.676	0.08604	0.89301	6.13575	0.02278	0	0.97722
1.678	0.08619	0.89359	6.12849	0.0228	0	0.9772
1.68	0.08639	0.8936	6.12126	0.02285	0	0.97715
1.682	0.08568	0.89316	6.11404	0.02297	0	0.97703
1.684	0.08565	0.89297	6.10684	0.02304	0	0.97696
1.686	0.0867	0.89268	6.09965	0.02308	0	0.97692
1.688	0.08722	0.89241	6.09249	0.02315	0	0.97685
1.69	0.08725	0.8921	6.08533	0.02321	0	0.97679
1.692	0.08674	0.89288	6.0782	0.02324	0	0.97676
1.694	0.08586	0.89283	6.07108	0.02329	0	0.97671
1.696	0.08578	0.89245	6.06398	0.02336	0	0.97664
1.698	0.08633	0.89243	6.0569	0.0234	0	0.9766
1.7	0.08673	0.89212	6.04983	0.02342	0	0.97658
1.702	0.08638	0.89232	6.04278	0.02345	0	0.97655
1.704	0.08587	0.89301	6.03575	0.02349	0	0.97651
1.706	0.08542	0.89238	6.02873	0.0235	0	0.9765
1.708	0.08555	0.8924	6.02173	0.02351	0	0.97649
1.71	0.08603	0.89233	6.01474	0.02359	0	0.97641
1.712	0.08629	0.89174	6.00777	0.02374	0	0.97626
1.714	0.08587	0.89157	6.00082	0.02384	0	0.97616
1.716	0.08588	0.89156	5.99388	0.02388	0	0.97612
1.718	0.0857	0.89156	5.98696	0.0239	0	0.9761
1.72	0.08509	0.89125	5.98005	0.02393	0	0.97607
1.722	0.08542	0.89222	5.97316	0.02398	0	0.97602
1.724	0.086	0.89228	5.96629	0.02403	0	0.97597
1.726	0.08642	0.89094	5.95943	0.02406	0	0.97594
1.728	0.08658	0.89054	5.95259	0.0241	0	0.9759
1.73	0.08576	0.89157	5.94576	0.02415	0	0.97585
1.732	0.0854	0.89169	5.93895	0.02417	0	0.97583
1.734	0.0859	0.89103	5.93216	0.02419	0	0.97581
1.736	0.08607	0.89089	5.92538	0.02424	0	0.97576
1.738	0.08557	0.89059	5.91861	0.02432	0	0.97568
1.74	0.08488	0.89103	5.91186	0.02441	0	0.97559
1.742	0.08485	0.89167	5.90513	0.02446	0	0.97554
1.744	0.08525	0.89084	5.89841	0.02451	0	0.97549
1.746	0.08543	0.89006	5.89171	0.0246	0	0.9754
1.748	0.08572	0.89011	5.88502	0.02473	0	0.97527
1.75	0.08565	0.89007	5.87835	0.02472	0	0.97528
1.752	0.08464	0.88969	5.87169	0.02459	0	0.97541
1.754	0.0843	0.88962	5.86505	0.02452	0	0.97548
1.756	0.08436	0.89024	5.85842	0.0246	0	0.9754
1.758	0.08429	0.89049	5.85181	0.02475	0	0.97525
1.76	0.08459	0.8904	5.84521	0.02489	0	0.97511
1.762	0.08462	0.89022	5.83863	0.02495	0	0.97505
1.764	0.08467	0.88981	5.83206	0.02491	0	0.97509
1.766	0.0852	0.88951	5.82551	0.02488	0	0.97512
1.768	0.08616	0.88951	5.81897	0.02495	0	0.97505
1.77	0.08714	0.88972	5.81245	0.02503	0	0.97497
1.772	0.08665	0.89015	5.80594	0.02509	1.11022e-16	0.97491
1.774	0.08606	0.88967	5.79945	0.02514	0	0.97486
1.776	0.08595	0.88941	5.79297	0.02515	0	0.97485
1.778	0.08641	0.8892	5.7865	0.02511	0	0.97489
1.78	0.08636	0.88915	5.78005	0.02505	0	0.97495
1.782	0.08616	0.88919	5.77361	0.02507	0	0.97493
1.784	0.0859	0.88905	5.76719	0.02525	0	0.97475
1.786	0.08628	0.88888	5.76078	0.0254	0	0.9746
1.788	0.08677	0.88868	5.75439	0.02544	0	0.97456
1.79	0.08653	0.88872	5.74801	0.02549	0	0.97451
1.792	0.08539	0.88858	5.74164	0.02555	0	0.97445
1.794	0.08521	0.8882	5.73529	0.02558	0	0.97442
1.796	0.08531	0.88919	5.72896	0.02561	0	0.97439
1.798	0.08577	0.88899	5.72263	0.02566	0	0.97434
1.8	0.08596	0.88847	5.71632	0.0257	1.11022e-16	0.9743
1.802	0.08439	0.88818	5.71003	0.02564	0	0.97436
1.804	0.0829	0.88817	5.70375	0.0256	0	0.9744
1.806	0.08372	0.88804	5.69748	0.02565	0	0.97435
1.808	0.08687	0.88814	5.69122	0.02578	0	0.97422
1.81	0.08707	0.88808	5.68498	0.02589	0	0.97411
1.812	0.08556	0.88786	5.67876	0.02598	0	0.97402
1.814	0.08685	0.88759	5.67254	0.02605	0	0.97395
1.816	0.08854	0.88772	5.66634	0.02604	0	0.97396
1.818	0.08674	0.88779	5.66016	0.02601	0	0.97399
1.82	0.08235	0.88742	5.65399	0.02603	0	0.97397
1.822	0.08128	0.887	5.64783	0.0261	0	0.9739
1.824	0.08432	0.88725	5.64168	0.02612	0	0.97388
1.826	0.08798	0.88743	5.63555	0.02611	0	0.97389
1.828	0.08943	0.88727	5.62943	0.02614	0	0.97386
1.83	0.08608	0.88717	5.62332	0.02617	0	0.97383
1.832	0.08153	0.88701	5.61723	0.02618	0	0.97382
1.834	0.08515	0.88679	5.61115	0.0262	0	0.9738
1.836	0.09083	0.8867	5.60509	0.02626	0	0.97374
1.838	0.08681	0.8867	5.59903	0.02636	0	0.97364
1.84	0.08255	0.88646	5.59299	0.02644	0	0.97356
1.842	0.08332	0.88627	5.58697	0.02646	0	0.97354
1.844	0.08649	0.88661	5.58095	0.02645	0	0.97355
1.846	0.09139	0.88681	5.57495	0.02644	0	0.97356
1.848	0.09454	0.88712	5.56896	0.02647	0	0.97353
1.85	0.08849	0.88669	5.56299	0.02652	0	0.97348
1.852	0.07902	0.88572	5.55703	0.02656	0	0.97344
1.854	0.07454	0.88542	5.55108	0.02661	0	0.97339
1.856	0.07602	0.88563	5.54514	0.02667	0	0.97333
1.858	0.08197	0.88605	5.53922	0.02671	0	0.97329
1.86	0.08783	0.88701	5.5333	0.02675	0	0.97325
1.862	0.09164	0.88718	5.5274	0.02679	0	0.97321
1.864	0.09143	0.88748	5.52152	0.02682	0	0.97318
1.866	0.08887	0.88709	5.51564	0.02685	0	0.97315
1.868	0.08537	0.88674	5.50978	0.02692	0	0.97308
1.87	0.08453	0.88603	5.50393	0.027	0	0.973
1.872	0.08529	0.8854	5.4981	0.02702	0	0.97298
1.874	0.0841	0.88583	5.49227	0.027	0	0.973
1.876	0.08388	0.8861	5.48646	0.027	0	0.973
1.878	0.08736	0.88595	5.48066	0.02705	0	0.97295
1.88	0.08855	0.88598	5.47487	0.02713	0	0.97287
1.882	0.08489	0.88556	5.4691	0.02718	0	0.97282
1.884	0.08147	0.88488	5.46334	0.02717	0	0.97283
1.886	0.08145	0.88488	5.45758	0.02717	0	0.97283
1.888	0.08288	0.88449	5.45185	0.02723	0	0.97277
1.89	0.08318	0.88459	5.44612	0.02732	0	0.97268
1.892	0.08432	0.88528	5.4404	0.02738	0	0.97262
1.894	0.08614	0.88525	5.4347	0.02741	0	0.97259
1.896	0.08531	0.88524	5.42901	0.02743	0	0.97257
1.898	0.08474	0.88504	5.42333	0.02743	0	0.97257
1.9	0.08632	0.88475	5.41766	0.02746	0	0.97254
1.902	0.08593	0.88421	5.41201	0.02752	0	0.97248
1.904	0.08263	0.88388	5.40637	0.02759	0	0.97241
1.906	0.08163	0.88373	5.40073	0.02764	0	0.97236
1.908	0.08303	0.88354	5.39511	0.02768	0	0.97232
1.91	0.08369	0.88381	5.38951	0.02771	0	0.97229
1.912	0.08308	0.88403	5.38391	0.02778	0	0.97222
1.914	0.08288	0.88406	5.37833	0.02784	0	0.97216
1.916	0.0836	0.8838	5.37275	0.02786	0	0.97214
1.918	0.08463	0.88305	5.36719	0.02789	0	0.97211
1.92	0.08439	0.88311	5.36164	0.02793	0	0.97207
1.922	0.0835	0.88303	5.3561	0.02794	0	0.97206
1.924	0.08338	0.8831	5.35057	0.02794	0	0.97206
1.926	0.08366	0.88295	5.34506	0.02796	0	0.97204
1.928	0.08372	0.88313	5.33955	0.02804	0	0.97196
1.93	0.08372	0.88392	5.33406	0.02816	0	0.97184
1.932	0.08374	0.88359	5.32858	0.02828	0	0.97172
1.934	0.0849	0.88275	5.32311	0.02837	0	0.97163
1.936	0.08535	0.88241	5.31765	0.02837	0	0.97163
1.938	0.08439	0.88206	5.3122	0.02835	0	0.97165
1.94	0.08369	0.8826	5.30676	0.02838	0	0.97162
1.942	0.08347	0.88193	5.30133	0.02844	0	0.97156
1.944	0.08368	0.88208	5.29592	0.02849	0	0.97151
1.946	0.08369	0.88223	5.29052	0.02853	1.11022e-16	0.97147
1.948	0.08424	0.88191	5.28512	0.02857	0	0.97143
1.95	0.08444	0.88182	5.27974	0.02858	0	0.97142
1.952	0.08348	0.88176	5.27437	0.02857	0	0.97143
1.954	0.08415	0.8816	5.26901	0.02859	0	0.97141
1.956	0.08456	0.88145	5.26366	0.02864	0	0.97136
1.958	0.08407	0.88157	5.25832	0.0287	0	0.9713
1.96	0.08392	0.8809	5.25299	0.02877	0	0.97123
1.962	0.08435	0.88048	5.24768	0.02882	0	0.97118
1.964	0.08412	0.88076	5.24237	0.02885	0	0.97115
1.966	0.08435	0.88117	5.23708	0.02889	0	0.97111
1.968	0.08384	0.88088	5.23179	0.0289	0	0.9711
1.97	0.08344	0.88024	5.22652	0.02891	0	0.97109
1.972	0.08402	0.88008	5.22125	0.02892	1.11022e-16	0.97108
1.974	0.08427	0.88062	5.216	0.02897	0	0.97103
1.976	0.08408	0.88068	5.21076	0.02906	0	0.97094
1.978	0.08358	0.87977	5.20553	0.02912	0	0.97088
1.98	0.08364	0.87937	5.20031	0.02911	0	0.97089
1.982	0.08372	0.87951	5.1951	0.02911	0	0.97089
1.984	0.08419	0.8802	5.1899	0.02913	0	0.97087
1.986	0.08418	0.87939	5.18471	0.02917	0	0.97083
1.988	0.08386	0.87979	5.17953	0.02923	0	0.97077
1.99	0.08436	0.87964	5.17436	0.0293	0	0.9707
1.992	0.08437	0.87916	5.1692	0.02936	0	0.97064
1.994	0.08438	0.87916	5.16405	0.02941	0	0.97059
1.996	0.08374	0.87948	5.15891	0.02943	0	0.97057
1.998	0.0834	0.87992	5.15378	0.02943	0	0.97057
2	0.08378	0.87984	5.14866	0.02945	0	0.97055
2.002	0.08401	0.87923	5.14356	0.02948	0	0.97052
2.004	0.08433	0.8787	5.13846	0.0295	0	0.9705
2.006	0.08385	0.87898	5.13337	0.02952	0	0.97048
2.008	0.08338	0.87951	5.12829	0.02956	0	0.97044
2.01	0.08301	0.87861	5.12323	0.02962	0	0.97038
2.012	0.08345	0.87929	5.11817	0.02968	0	0.97032
2.014	0.08428	0.87928	5.11312	0.02974	0	0.97026
2.016	0.084	0.87873	5.10808	0.02979	0	0.97021
2.018	0.08357	0.87853	5.10306	0.02985	0	0.97015
2.02	0.08323	0.87901	5.09804	0.0299	0	0.9701
2.022	0.08375	0.87856	5.09303	0.02989	0	0.97011
2.024	0.08352	0.87825	5.08803	0.02987	0	0.97013
2.026	0.08297	0.8782	5.08304	0.0299	0	0.9701
2.028	0.08272	0.87873	5.07807	0.02994	0	0.97006
2.03	0.08395	0.87814	5.0731	0.02997	0	0.97003
2.032	0.08417	0.87838	5.06814	0.03001	0	0.96999
2.034	0.08353	0.87797	5.06319	0.03006	0	0.96994
2.036	0.08343	0.87834	5.05825	0.03006	0	0.96994
2.038	0.08352	0.8785	5.05332	0.03008	0	0.96992
2.04	0.08437	0.87836	5.0484	0.03012	0	0.96988
2.042	0.08451	0.87816	5.04349	0.03014	1.11022e-16	0.96986
2.044	0.08427	0.87812	5.03859	0.03014	1.11022e-16	0.96986
2.046	0.08353	0.87778	5.03369	0.03015	0	0.96985
2.048	0.08361	0.87796	5.02881	0.03019	0	0.96981
2.05	0.08319	0.87774	5.02394	0.03027	0	0.96973
2.052	0.08272	0.87792	5.01908	0.03034	0	0.96966
2.054	0.08323	0.87811	5.01422	0.03038	0	0.96962
2.056	0.08408	0.87809	5.00938	0.03039	0	0.96961
2.058	0.08365	0.87776	5.00454	0.03038	0	0.96962
2.06	0.08388	0.87773	4.99972	0.03036	0	0.96964
2.062	0.08378	0.87782	4.9949	0.03038	0	0.96962
2.064	0.08349	0.87804	4.99009	0.03042	0	0.96958
2.066	0.08387	0.87756	4.98529	0.03045	0	0.96955
2.068	0.08355	0.87755	4.9805	0.03047	0	0.96953
2.07	0.08291	0.87736	4.97572	0.03048	0	0.96952
2.072	0.08223	0.87756	4.97095	0.0305	0	0.9695
2.074	0.082	0.878	4.96619	0.03059	0	0.96941
2.076	0.08164	0.87709	4.96144	0.03071	0	0.96929
2.078	0.08223	0.87641	4.9567	0.03075	0	0.96925
2.08	0.08267	0.87625	4.95196	0.03073	0	0.96927
2.082	0.08264	0.87592	4.94724	0.0307	0	0.9693
2.084	0.08363	0.87614	4.94252	0.03066	0	0.96934
2.086	0.08448	0.87559	4.93781	0.03064	0	0.96936
2.088	0.08537	0.87576	4.93312	0.03067	0	0.96933
2.09	0.08424	0.87648	4.92843	0.03076	0	0.96924
2.092	0.08234	0.87599	4.92375	0.03085	0	0.96915
2.094	0.08212	0.87536	4.91908	0.0309	0	0.9691
2.096	0.083	0.87533	4.91441	0.03087	0	0.96913
2.098	0.083	0.87574	4.90976	0.03082	0	0.96918
2.1	0.08277	0.87511	4.90511	0.03081	0	0.96919
2.102	0.08213	0.87499	4.90048	0.03086	0	0.96914
2.104	0.08216	0.87441	4.89585	0.03091	0	0.96909
2.106	0.08245	0.87425	4.89123	0.03094	0	0.96906
2.108	0.08269	0.8757	4.88662	0.03097	0	0.96903
2.11	0.082	0.87439	4.88202	0.03101	0	0.96899
2.112	0.08236	0.87403	4.87743	0.03107	0	0.96893
2.114	0.08269	0.87479	4.87284	0.03112	0	0.96888
2.116	0.08359	0.87381	4.86827	0.03114	0	0.96886
2.118	0.08375	0.87307	4.8637	0.03112	0	0.96888
2.12	0.08224	0.87332	4.85914	0.03116	0	0.96884
2.122	0.08138	0.87252	4.85459	0.03123	0	0.96877
2.124	0.08212	0.87264	4.85005	0.03126	0	0.96874
2.126	0.08285	0.87287	4.84552	0.03123	0	0.96877
2.128	0.0837	0.87197	4.84099	0.03124	0	0.96876
2.13	0.08406	0.87154	4.83648	0.03127	0	0.96873
2.132	0.08279	0.87123	4.83197	0.03126	0	0.96874
2.134	0.08202	0.87068	4.82747	0.03124	0	0.96876
2.136	0.08222	0.87122	4.82298	0.03125	0	0.96875
2.138	0.0825	0.87018	4.8185	0.03126	0	0.96874
2.14	0.08195	0.87023	4.81403	0.03125	0	0.96875
2.142	0.0821	0.86963	4.80956	0.03126	0	0.96874
2.144	0.08255	0.8693	4.8051	0.0313	0	0.9687
2.146	0.08232	0.86851	4.80065	0.03136	0	0.96864
2.148	0.08247	0.86815	4.79621	0.03141	0	0.96859
2.15	0.08198	0.86746	4.79178	0.03139	0	0.96861
2.152	0.0826	0.86746	4.78735	0.03139	0	0.96861
2.154	0.08295	0.86617	4.78294	0.03143	0	0.96857
2.156	0.08157	0.86546	4.77853	0.03148	0	0.96852
2.158	0.08117	0.86453	4.77413	0.03149	0	0.96851
2.16	0.08148	0.86376	4.76974	0.03149	0	0.96851
2.162	0.08242	0.86278	4.76535	0.03148	0	0.96852
2.164	0.0826	0.86303	4.76098	0.03149	0	0.96851
2.166	0.08148	0.8613	4.75661	0.0315	0	0.9685
2.168	0.08092	0.86004	4.75225	0.03153	1.11022e-16	0.96847
2.17	0.08094	0.85848	4.7479	0.03159	0	0.96841
2.172	0.08116	0.85812	4.74355	0.03164	0	0.96836
2.174	0.08145	0.85671	4.73922	0.03164	0	0.96836
2.176	0.08141	0.85529	4.73489	0.03162	0	0.96838
2.178	0.08188	0.85406	4.73057	0.03162	0	0.96838
2.18	0.08101	0.85258	4.72626	0.03164	0	0.96836
2.182	0.08022	0.85117	4.72195	0.03166	0	0.96834
2.184	0.07911	0.85019	4.71766	0.03169	0	0.96831
2.186	0.07941	0.84894	4.71337	0.03173	0	0.96827
2.188	0.0799	0.84774	4.70909	0.03173	0	0.96827
2.19	0.07991	0.8465	4.70481	0.03171	0	0.96829
2.192	0.0798	0.84559	4.70055	0.03171	0	0.96829
2.194	0.07971	0.84475	4.69629	0.03175	0	0.96825
2.196	0.0806	0.84444	4.69204	0.03181	0	0.96819
2.198	0.07943	0.84437	4.6878	0.03187	0	0.96813
2.2	0.07931	0.84356	4.68356	0.03193	0	0.96807
2.202	0.07957	0.84275	4.67934	0.03198	0	0.96802
2.204	0.08027	0.84232	4.67512	0.03199	0	0.96801
2.206	0.0799	0.8423	4.67091	0.03198	0	0.96802
2.208	0.07974	0.84203	4.6667	0.03197	0	0.96803
2.21	0.07858	0.84152	4.6625	0.032	0	0.968
2.212	0.07915	0.84268	4.65832	0.03205	0	0.96795
2.214	0.07922	0.8417	4.65413	0.03207	0	0.96793
2.216	0.07972	0.84207	4.64996	0.03208	0	0.96792
2.218	0.07941	0.84201	4.64579	0.03207	0	0.96793
2.22	0.07894	0.84319	4.64163	0.03206	0	0.96794
2.222	0.07912	0.84221	4.63748	0.03208	0	0.96792
2.224	0.07981	0.84267	4.63334	0.0321	0	0.9679
2.226	0.07971	0.84265	4.6292	0.03211	0	0.96789
2.228	0.07843	0.84319	4.62507	0.03209	0	0.96791
2.23	0.07947	0.84283	4.62095	0.03206	0	0.96794
2.232	0.08001	0.84341	4.61683	0.03207	0	0.96793
2.234	0.07972	0.84465	4.61273	0.03212	0	0.96788
2.236	0.07893	0.84407	4.60863	0.03217	0	0.96783
2.238	0.07932	0.84395	4.60453	0.03223	0	0.96777
2.24	0.07978	0.84452	4.60045	0.03226	0	0.96774
2.242	0.08032	0.84444	4.59637	0.03225	0	0.96775
2.244	0.07979	0.846	4.5923	0.03226	0	0.96774
2.246	0.0794	0.84551	4.58823	0.03228	0	0.96772
2.248	0.0793	0.84554	4.58418	0.03229	0	0.96771
2.25	0.07981	0.84511	4.58013	0.03229	0	0.96771
2.252	0.07998	0.84624	4.57609	0.03231	0	0.96769
2.254	0.07978	0.84601	4.57205	0.03234	0	0.96766
2.256	0.08054	0.8466	4.56802	0.03239	0	0.96761
2.258	0.08027	0.84786	4.564	0.03244	0	0.96756
2.26	0.07929	0.84759	4.55999	0.03245	0	0.96755
2.262	0.07867	0.84768	4.55598	0.03244	0	0.96756
2.264	0.07911	0.84801	4.55198	0.03245	0	0.96755
2.266	0.07925	0.84796	4.54799	0.03248	0	0.96752
2.268	0.07969	0.84837	4.544	0.03248	0	0.96752
2.27	0.07973	0.84846	4.54002	0.0325	0	0.9675
2.272	0.08004	0.84897	4.53605	0.03257	0	0.96743
2.274	0.08022	0.84871	4.53209	0.03262	0	0.96738
2.276	0.08016	0.84988	4.52813	0.03264	0	0.96736
2.278	0.08035	0.84951	4.52418	0.03263	0	0.96737
2.28	0.07905	0.84998	4.52023	0.03259	0	0.96741
2.282	0.07908	0.85022	4.51629	0.03258	0	0.96742
2.284	0.07884	0.85013	4.51236	0.03262	0	0.96738
2.286	0.07954	0.85017	4.50844	0.03267	0	0.96733
2.288	0.08013	0.85058	4.50452	0.03272	0	0.96728
2.29	0.08087	0.84997	4.50061	0.03275	1.11022e-16	0.96725
2.292	0.08119	0.85143
2.294	0.08106	0.85155
2.296	0.08183	0.85137
2.298	0.07954	0.8511
2.3	0.07911	0.85158
2.302	0.07956	0.85171
2.304	0.07966	0.85162
2.306	0.07971	0.85164
2.308	0.0804	0.85167
2.31	0.08032	0.8513
2.312	0.08038	0.85114
2.314	0.08094	0.85235
2.316	0.0802	0.85184
2.318	0.0787	0.85148
2.32	0.07866	0.85146
2.322	0.07949	0.85144
2.324	0.07939	0.85103
2.326	0.07976	0.85143
2.328	0.0799	0.85175
2.33	0.08023	0.85086
2.332	0.0804	0.85227
2.334	0.08094	0.85206
2.336	0.08057	0.85153
2.338	0.0804	0.85151
2.34	0.0795	0.8511
2.342	0.07901	0.85119
2.344	0.07932	0.85143
2.346	0.07927	0.85125
2.348	0.07961	0.85097
2.35	0.08012	0.8511
2.352	0.08011	0.85073
2.354	0.08053	0.85166
2.356	0.08054	0.85099
2.358	0.08007	0.8508
2.36	0.07908	0.85064
2.362	0.07931	0.85019
2.364	0.079	0.85005
2.366	0.07962	0.85023
2.368	0.07976	0.84927
2.37	0.08009	0.85026
2.372	0.0807	0.84911
2.374	0.08047	0.84941
2.376	0.07999	0.84884
2.378	0.07936	0.84852
2.38	0.07927	0.84828
2.382	0.07912	0.8485
2.384	0.07991	0.84731
2.386	0.08008	0.84848
2.388	0.07988	0.84714
2.39	0.08002	0.847
2.392	0.07903	0.84656
2.394	0.07921	0.84655
2.396	0.07956	0.84572
2.398	0.07949	0.84505
2.4	0.07899	0.84487
2.402	0.0782	0.84429
2.404	0.07916	0.84392
2.406	0.07967	0.84445
2.408	0.07938	0.84307
2.41	0.07986	0.84215
2.412	0.07972	0.84173
2.414	0.08062	0.841
2.416	0.08034	0.84026
2.418	0.07906	0.84025
2.42	0.07817	0.8392
2.422	0.07858	0.83945
2.424	0.07941	0.8385
2.426	0.07918	0.83793
2.428	0.07846	0.83721
2.43	0.0781	0.8365
2.432	0.07848	0.83655
2.434	0.07834	0.83539
2.436	0.07787	0.83582
2.438	0.07851	0.83457
2.44	0.07893	0.83372
2.442	0.0789	0.8331
2.444	0.07891	0.83289
2.446	0.07799	0.83106
2.448	0.07847	0.83075
2.45	0.07875	0.83087
2.452	0.07813	0.83123
2.454	0.0782	0.83024
2.456	0.07793	0.82861
2.458	0.07728	0.82828
2.46	0.07738	0.82904
2.462	0.078	0.82749
2.464	0.07811	0.8277
2.466	0.07859	0.82682
2.468	0.0789	0.82677
2.47	0.0786	0.82581
2.472	0.07893	0.82512
2.474	0.0775	0.8256
2.476	0.07672	0.82553
2.478	0.07689	0.82436
2.48	0.07802	0.82336
2.482	0.07906	0.82289
2.484	0.07839	0.82414
2.486	0.07616	0.82308
2.488	0.07435	0.82263
2.49	0.07379	0.82155
2.492	0.07575	0.82146
2.494	0.0761	0.82095
2.496	0.07456	0.82071
2.498	0.07352	0.81968
2.5	0.07402	0.82041

## Sheet: Figure 4b
Figure 4b	Optical properties of the MMPMC.
Vsible spectrum			Infrared spectral range
Wavelength(μm)	γMMPMC	τMMPMC	Wavelength(μm)	γMMPMC	τMMPMC	εMMPMC
0.40419	0.04009	0.93642	4.5	0.02883	0.00565	0.96552
0.40909	0.04509	0.93197	4.505	0.02884	0.00534	0.96583
0.41411	0.04164	0.9347	4.51	0.02884	0.00504	0.96611
0.41926	0.03823	0.9361	4.515	0.02885	0.00476	0.96639
0.42453	0.04196	0.93109	4.52	0.02886	0.00448	0.96666
0.42994	0.03478	0.93951	4.525	0.02886	0.00421	0.96693
0.43548	0.04709	0.92953	4.53	0.02887	0.00395	0.96718
0.44118	0.03691	0.94046	4.535	0.02888	0.0037	0.96742
0.44702	0.05007	0.92771	4.54	0.02888	0.00346	0.96765
0.45302	0.03596	0.94165	4.545	0.02889	0.00324	0.96787
0.45918	0.05156	0.926	4.55	0.02889	0.00304	0.96808
0.46552	0.03503	0.9421	4.555	0.02889	0.00283	0.96827
0.47203	0.0465	0.93086	4.56	0.0289	0.00265	0.96846
0.47872	0.04405	0.93275	4.565	0.02891	0.00247	0.96862
0.48561	0.03757	0.93791	4.57	0.02892	0.0023	0.96878
0.4927	0.04475	0.92942	4.575	0.02893	0.00214	0.96893
0.5	0.03192	0.94307	4.58	0.02893	0.002	0.96907
0.50752	0.05005	0.92704	4.585	0.02893	0.00185	0.96921
0.51527	0.03978	0.93774	4.59	0.02894	0.00172	0.96934
0.52326	0.0466	0.93132	4.595	0.02894	0.0016	0.96945
0.5315	0.04121	0.93694	4.6	0.02895	0.0015	0.96956
0.54	0.04542	0.93241	4.605	0.02895	0.00139	0.96966
0.54878	0.04372	0.93394	4.61	0.02896	0.00129	0.96975
0.55785	0.04351	0.93404	4.615	0.02897	0.0012	0.96983
0.56723	0.04469	0.93257	4.62	0.02898	0.00111	0.96991
0.57692	0.03753	0.93821	4.625	0.02898	0.00103	0.96999
0.58696	0.04297	0.93163	4.63	0.02899	0.000951874	0.97006
0.59735	0.03708	0.93809	4.635	0.029	0.000883505	0.97012
0.60811	0.0458	0.93091	4.64	0.029	0.000824269	0.97017
0.61927	0.04196	0.93569	4.645	0.02901	0.000773356	0.97022
0.63084	0.04105	0.93722	4.65	0.02902	0.000724247	0.97026
0.64286	0.05361	0.92481	4.655	0.02902	0.000675465	0.9703
0.65534	0.03621	0.94188	4.66	0.02903	0.00063008	0.97034
0.66832	0.05239	0.92545	4.665	0.02903	0.000586328	0.97038
0.68182	0.03712	0.94034	4.67	0.02903	0.00054119	0.97043
0.69588	0.04248	0.93458	4.675	0.02903	0.000497368	0.97047
0.71053	0.04704	0.92874	4.68	0.02903	0.000457422	0.97051
0.72581	0.03411	0.9409	4.685	0.02903	0.000420335	0.97055
0.74176	0.04471	0.92973	4.69	0.02904	0.000387466	0.97057
0.75843	0.03552	0.94071	4.695	0.02904	0.000362218	0.97059
0.77586	0.04187	0.93576	4.7	0.02905	0.000342108	0.97061
0.79412	0.04936	0.92908	4.705	0.02905	0.000321091	0.97063
0.81325	0.04152	0.93655	4.71	0.02905	0.000297866	0.97066
0.83333	0.05082	0.92683	4.715	0.02905	0.000275673	0.97067
0.85443	0.03743	0.94046	4.72	0.02906	0.00025777	0.97069
0.87662	0.04637	0.9315	4.725	0.02906	0.000244598	0.97069
0.9	0.04022	0.93668	4.73	0.02907	0.000231826	0.9707
0.92466	0.0426	0.9327	4.735	0.02908	0.000215288	0.97071
0.9507	0.04281	0.93056	4.74	0.02908	0.000197557	0.97073
0.97826	0.02962	0.94412	4.745	0.02907	0.000184444	0.97074
1.00746	0.04309	0.93151	4.75	0.02907	0.000175385	0.97076
1.03846	0.03599	0.94094	4.755	0.02906	0.000166353	0.97077
1.07143	0.04418	0.93405	4.76	0.02906	0.000156335	0.97079
1.10656	0.05503	0.92275	4.765	0.02905	0.000146158	0.9708
1.14407	0.03542	0.94191	4.77	0.02905	0.000135799	0.97081
1.18421	0.05015	0.92713	4.775	0.02905	0.000127354	0.97082
1.22727	0.03619	0.93976	4.78	0.02905	0.000123654	0.97082
1.27358	0.03988	0.93515	4.785	0.02904	0.000122401	0.97083
1.32353	0.04134	0.92966	4.79	0.02903	0.00011937	0.97085
1.37755	0.03248	0.94007	4.795	0.02902	0.00011388	0.97087
1.43617	0.03761	0.93179	4.8	0.02901	0.000106887	0.97088
1.5	0.03973	0.93249	4.805	0.02901	9.80683e-05	0.97089
1.56977	0.04019	0.93573	4.81	0.02901	8.96607e-05	0.9709
1.64634	0.04024	0.93702	4.815	0.02902	8.58273e-05	0.9709
1.73077	0.04406	0.93134	4.82	0.02903	8.46562e-05	0.97089
1.82432	0.04528	0.93098	4.825	0.02904	8.05865e-05	0.97088
1.92857	0.04055	0.93593	4.83	0.02905	7.40552e-05	0.97087
2.04545	0.03919	0.93603	4.835	0.02908	7.03616e-05	0.97085
2.17742	0.04108	0.93376	4.84	0.0291	7.00774e-05	0.97083
2.32759	0.0344	0.93934	4.845	0.02913	6.8722e-05	0.9708
2.5	0.02629	0.94136	4.85	0.02915	6.47759e-05	0.97078
			4.855	0.02919	5.996e-05	0.97075
			4.86	0.02922	5.55194e-05	0.97072
			4.865	0.02926	5.2785e-05	0.97069
			4.87	0.02929	5.37003e-05	0.97065
			4.875	0.02932	5.79323e-05	0.97062
			4.88	0.02936	6.29293e-05	0.97058
			4.885	0.02939	6.71522e-05	0.97054
			4.89	0.02943	6.96607e-05	0.9705
			4.895	0.02947	6.81662e-05	0.97047
			4.9	0.02949	6.17596e-05	0.97045
			4.905	0.02951	5.315e-05	0.97044
			4.91	0.02952	4.45446e-05	0.97043
			4.915	0.02954	3.49222e-05	0.97043
			4.92	0.02955	2.46521e-05	0.97043
			4.925	0.02955	1.81307e-05	0.97043
			4.93	0.02956	1.75209e-05	0.97042
			4.935	0.02957	1.93959e-05	0.97041
			4.94	0.02958	1.99835e-05	0.9704
			4.945	0.0296	2.02244e-05	0.97038
			4.95	0.02962	2.3323e-05	0.97035
			4.955	0.02964	2.97325e-05	0.97033
			4.96	0.02965	3.58133e-05	0.97031
			4.965	0.02966	3.69168e-05	0.9703
			4.97	0.02968	3.14367e-05	0.97029
			4.975	0.02969	2.20705e-05	0.97028
			4.98	0.02971	1.29666e-05	0.97028
			4.985	0.02972	5.70374e-06	0.97027
			4.99	0.02973	1.20957e-06	0.97027
			4.995	0.02974	1e-06	0.97026
			5	0.02975	1.50705e-06	0.97025
			5.005	0.02976	7.53369e-06	0.97023
			5.01	0.02977	1.00506e-05	0.97022
			5.015	0.02979	6.97416e-06	0.97021
			5.02	0.0298	3.92462e-06	0.9702
			5.025	0.0298	4.74426e-06	0.9702
			5.03	0.02979	6.09243e-06	0.9702
			5.035	0.02978	4.00084e-06	0.97021
			5.04	0.02977	1e-06	0.97023
			5.045	0.02976	1.00058e-06	0.97024
			5.05	0.02974	1.84818e-06	0.97026
			5.055	0.02973	4.87645e-06	0.97027
			5.06	0.02972	5.04739e-06	0.97028
			5.065	0.02971	1.80733e-06	0.97029
			5.07	0.0297	1e-06	0.9703
			5.075	0.0297	1e-06	0.9703
			5.08	0.0297	1e-06	0.97029
			5.085	0.0297	1e-06	0.9703
			5.09	0.02968	1e-06	0.97032
			5.095	0.02966	1e-06	0.97034
			5.1	0.02963	1e-06	0.97037
			5.105	0.02961	1e-06	0.97038
			5.11	0.0296	1e-06	0.9704
			5.115	0.02958	1e-06	0.97042
			5.12	0.02956	1e-06	0.97044
			5.125	0.02954	1e-06	0.97046
			5.13	0.02953	1e-06	0.97047
			5.135	0.02953	1e-06	0.97047
			5.14	0.02953	1e-06	0.97047
			5.145	0.02952	1e-06	0.97048
			5.15	0.02949	1e-06	0.97051
			5.155	0.02946	1e-06	0.97054
			5.16	0.02942	1e-06	0.97057
			5.165	0.0294	1e-06	0.9706
			5.17	0.02937	1e-06	0.97062
			5.175	0.02935	1e-06	0.97065
			5.18	0.02933	1e-06	0.97067
			5.185	0.02931	1.48992e-06	0.97069
			5.19	0.0293	4.67315e-06	0.97069
			5.195	0.02929	5.29266e-06	0.9707
			5.2	0.02928	3.06163e-06	0.97072
			5.205	0.02925	1e-06	0.97075
			5.21	0.02921	1e-06	0.97079
			5.215	0.02916	1e-06	0.97084
			5.22	0.02912	1e-06	0.97088
			5.225	0.02908	1e-06	0.97092
			5.23	0.02905	1e-06	0.97095
			5.235	0.02902	1e-06	0.97097
			5.24	0.02899	1e-06	0.97101
			5.245	0.02894	1e-06	0.97106
			5.25	0.02889	1.64328e-06	0.97111
			5.255	0.02884	4.89822e-06	0.97116
			5.26	0.0288	8.96235e-06	0.97119
			5.265	0.02876	1.19483e-05	0.97122
			5.27	0.02873	1.11487e-05	0.97126
			5.275	0.0287	6.82436e-06	0.97129
			5.28	0.02868	2.88176e-06	0.97132
			5.285	0.02865	1.85182e-06	0.97135
			5.29	0.02863	2.58206e-06	0.97137
			5.295	0.02861	3.1576e-06	0.97139
			5.3	0.02859	3.14652e-06	0.97141
			5.305	0.02858	2.55133e-06	0.97142
			5.31	0.02857	1.05268e-06	0.97143
			5.315	0.02857	1e-06	0.97142
			5.32	0.02858	1e-06	0.97142
			5.325	0.0286	1e-06	0.9714
			5.33	0.02861	1e-06	0.97138
			5.335	0.02864	1e-06	0.97135
			5.34	0.02869	1e-06	0.97131
			5.345	0.02874	1e-06	0.97126
			5.35	0.02879	1e-06	0.97121
			5.355	0.0288	1e-06	0.97119
			5.36	0.0288	1e-06	0.9712
			5.365	0.02878	1e-06	0.97122
			5.37	0.02877	1e-06	0.97123
			5.375	0.02878	1e-06	0.97122
			5.38	0.02879	1e-06	0.97121
			5.385	0.02879	1e-06	0.97121
			5.39	0.02879	1e-06	0.97121
			5.395	0.0288	1e-06	0.9712
			5.4	0.0288	1e-06	0.9712
			5.405	0.02881	1e-06	0.97118
			5.41	0.02882	1.00376e-06	0.97118
			5.415	0.02882	5.91272e-06	0.97117
			5.42	0.0288	1.59664e-05	0.97119
			5.425	0.02875	2.0153e-05	0.97123
			5.43	0.0287	1.82483e-05	0.97128
			5.435	0.02866	1.35987e-05	0.97133
			5.44	0.02862	1.02583e-05	0.97137
			5.445	0.02858	1.0123e-05	0.97141
			5.45	0.02854	1.3067e-05	0.97145
			5.455	0.02849	1.69838e-05	0.97149
			5.46	0.02843	1.88799e-05	0.97155
			5.465	0.02835	1.81985e-05	0.97163
			5.47	0.02825	1.68857e-05	0.97173
			5.475	0.02813	1.74911e-05	0.97185
			5.48	0.028	1.96947e-05	0.97198
			5.485	0.02787	2.1751e-05	0.9721
			5.49	0.02775	2.29037e-05	0.97223
			5.495	0.02763	2.36155e-05	0.97235
			5.5	0.0275	2.38605e-05	0.97247
			5.505	0.02739	2.22806e-05	0.97259
			5.51	0.02728	1.74347e-05	0.9727
			5.515	0.02718	1.00374e-05	0.97281
			5.52	0.02709	2.56464e-06	0.9729
			5.525	0.02701	1e-06	0.97299
			5.53	0.02694	1e-06	0.97306
			5.535	0.02688	1e-06	0.97311
			5.54	0.02685	1.00028e-06	0.97315
			5.545	0.02683	1.72491e-06	0.97317
			5.55	0.02683	8.38831e-06	0.97316
			5.555	0.02683	9.53482e-06	0.97316
			5.56	0.02684	2.5644e-06	0.97315
			5.565	0.02686	1e-06	0.97314
			5.57	0.02689	1e-06	0.97311
			5.575	0.02693	1e-06	0.97306
			5.58	0.02698	1e-06	0.97302
			5.585	0.02703	1e-06	0.97296
			5.59	0.0271	1e-06	0.9729
			5.595	0.02718	1.0159e-06	0.97282
			5.6	0.02728	3.58387e-06	0.97271
			5.605	0.02741	6.858e-06	0.97259
			5.61	0.02754	7.64031e-06	0.97245
			5.615	0.02768	6.34182e-06	0.97231
			5.62	0.02781	4.43063e-06	0.97219
			5.625	0.02792	3.1978e-06	0.97208
			5.63	0.02802	2.43651e-06	0.97198
			5.635	0.02811	1.23638e-06	0.97189
			5.64	0.02819	1e-06	0.97181
			5.645	0.02825	1e-06	0.97175
			5.65	0.02828	1e-06	0.97172
			5.655	0.02829	1e-06	0.9717
			5.66	0.02832	1e-06	0.97168
			5.665	0.02835	1e-06	0.97165
			5.67	0.02839	1e-06	0.97161
			5.675	0.02844	1.03824e-06	0.97156
			5.68	0.02848	4.90678e-06	0.97152
			5.685	0.02851	1.04755e-05	0.97148
			5.69	0.02853	1.40485e-05	0.97145
			5.695	0.02856	1.43479e-05	0.97143
			5.7	0.02859	1.21257e-05	0.9714
			5.705	0.02863	9.82779e-06	0.97136
			5.71	0.02869	8.57604e-06	0.9713
			5.715	0.02876	7.89008e-06	0.97123
			5.72	0.02881	7.3381e-06	0.97118
			5.725	0.02884	8.10472e-06	0.97116
			5.73	0.02884	1.12072e-05	0.97115
			5.735	0.02882	1.63021e-05	0.97116
			5.74	0.0288	2.06588e-05	0.97118
			5.745	0.02877	2.20827e-05	0.9712
			5.75	0.02874	2.04798e-05	0.97124
			5.755	0.02871	1.80014e-05	0.97127
			5.76	0.02867	1.70448e-05	0.97131
			5.765	0.02861	1.80252e-05	0.97137
			5.77	0.02854	2.04165e-05	0.97144
			5.775	0.02845	2.30501e-05	0.97153
			5.78	0.02837	2.51718e-05	0.97161
			5.785	0.02831	2.55531e-05	0.97167
			5.79	0.02826	2.29304e-05	0.97172
			5.795	0.02821	1.65685e-05	0.97178
			5.8	0.02816	8.01648e-06	0.97183
			5.805	0.02813	1.62692e-06	0.97187
			5.81	0.0281	1e-06	0.9719
			5.815	0.02809	1e-06	0.97191
			5.82	0.02809	1e-06	0.97191
			5.825	0.02808	1.00949e-06	0.97192
			5.83	0.02805	2.93992e-06	0.97194
			5.835	0.02803	1.10516e-05	0.97196
			5.84	0.02802	1.78731e-05	0.97196
			5.845	0.02803	2.02396e-05	0.97195
			5.85	0.02805	1.69968e-05	0.97193
			5.855	0.02807	9.54057e-06	0.97192
			5.86	0.02808	2.6255e-06	0.97192
			5.865	0.02808	1.01649e-06	0.97192
			5.87	0.02806	3.92562e-06	0.97193
			5.875	0.02804	1.23574e-05	0.97195
			5.88	0.02802	2.10237e-05	0.97196
			5.885	0.028	2.67323e-05	0.97197
			5.89	0.02798	2.85313e-05	0.97199
			5.895	0.02796	2.72366e-05	0.97201
			5.9	0.02796	2.39127e-05	0.97201
			5.905	0.028	1.96569e-05	0.97198
			5.91	0.02806	1.59695e-05	0.97192
			5.915	0.02813	1.42129e-05	0.97186
			5.92	0.02819	1.49164e-05	0.9718
			5.925	0.02824	1.76081e-05	0.97174
			5.93	0.02828	2.03203e-05	0.9717
			5.935	0.02832	2.05603e-05	0.97166
			5.94	0.02835	1.76335e-05	0.97164
			5.945	0.02836	1.26077e-05	0.97162
			5.95	0.02838	7.51326e-06	0.97161
			5.955	0.0284	3.04871e-06	0.9716
			5.96	0.0284	1.03383e-06	0.97159
			5.965	0.02841	1e-06	0.97159
			5.97	0.02841	1e-06	0.97159
			5.975	0.02841	1e-06	0.97159
			5.98	0.0284	1e-06	0.9716
			5.985	0.02835	1e-06	0.97165
			5.99	0.02828	1e-06	0.97171
			5.995	0.02821	1e-06	0.97179
			6	0.02815	1e-06	0.97185
			6.005	0.02809	1e-06	0.97191
			6.01	0.02803	1e-06	0.97197
			6.015	0.02797	1e-06	0.97203
			6.02	0.02791	1e-06	0.97209
			6.025	0.02785	1e-06	0.97215
			6.03	0.0278	1e-06	0.9722
			6.035	0.02773	1e-06	0.97227
			6.04	0.02766	1e-06	0.97234
			6.045	0.0276	1e-06	0.9724
			6.05	0.02755	1.00699e-06	0.97245
			6.055	0.02752	2.09332e-06	0.97248
			6.06	0.0275	3.30962e-06	0.97249
			6.065	0.02747	1.2778e-06	0.97253
			6.07	0.02741	1e-06	0.97259
			6.075	0.02731	1e-06	0.97269
			6.08	0.02722	1.05354e-06	0.97278
			6.085	0.02715	2.90805e-06	0.97285
			6.09	0.02711	6.17578e-06	0.97288
			6.095	0.02708	8.60213e-06	0.97291
			6.1	0.02704	9.76533e-06	0.97295
			6.105	0.02697	8.40374e-06	0.97302
			6.11	0.02686	4.1678e-06	0.97314
			6.115	0.02672	1e-06	0.97328
			6.12	0.02659	1e-06	0.97341
			6.125	0.02648	1e-06	0.97352
			6.13	0.0264	1e-06	0.9736
			6.135	0.02633	1e-06	0.97367
			6.14	0.02626	1e-06	0.97374
			6.145	0.02615	1.00121e-06	0.97385
			6.15	0.026	1.29183e-06	0.974
			6.155	0.02581	5.97788e-06	0.97418
			6.16	0.02558	1.2605e-05	0.97441
			6.165	0.02533	1.80778e-05	0.97465
			6.17	0.02506	2.05146e-05	0.97492
			6.175	0.02477	1.94243e-05	0.97521
			6.18	0.02443	1.58721e-05	0.97555
			6.185	0.02406	1.07787e-05	0.97593
			6.19	0.0237	5.25157e-06	0.97629
			6.195	0.02341	1.13899e-06	0.97658
			6.2	0.02326	1e-06	0.97674
			6.205	0.02321	1e-06	0.97679
			6.21	0.02327	1e-06	0.97673
			6.215	0.02343	1e-06	0.97657
			6.22	0.02365	1e-06	0.97634
			6.225	0.02394	1e-06	0.97606
			6.23	0.02428	1e-06	0.97572
			6.235	0.02463	1e-06	0.97536
			6.24	0.02498	1e-06	0.97502
			6.245	0.02529	1e-06	0.9747
			6.25	0.02557	1e-06	0.97442
			6.255	0.02582	1e-06	0.97418
			6.26	0.02601	1e-06	0.97399
			6.265	0.02617	1e-06	0.97383
			6.27	0.02629	1e-06	0.97371
			6.275	0.02635	1e-06	0.97365
			6.28	0.02637	1e-06	0.97363
			6.285	0.02633	1e-06	0.97366
			6.29	0.02624	1e-06	0.97376
			6.295	0.0261	1e-06	0.9739
			6.3	0.02594	1e-06	0.97406
			6.305	0.02576	1e-06	0.97424
			6.31	0.02561	1e-06	0.97439
			6.315	0.0255	1e-06	0.9745
			6.32	0.02544	1e-06	0.97456
			6.325	0.02546	1e-06	0.97454
			6.33	0.02554	1e-06	0.97445
			6.335	0.0257	1e-06	0.9743
			6.34	0.02592	1e-06	0.97407
			6.345	0.02618	1e-06	0.97382
			6.35	0.02643	1e-06	0.97357
			6.355	0.02663	1e-06	0.97337
			6.36	0.02678	1e-06	0.97322
			6.365	0.0269	1e-06	0.9731
			6.37	0.02699	1e-06	0.97301
			6.375	0.02706	1e-06	0.97294
			6.38	0.02711	1e-06	0.97289
			6.385	0.02713	1e-06	0.97286
			6.39	0.02714	1e-06	0.97286
			6.395	0.02712	1e-06	0.97288
			6.4	0.02709	1e-06	0.97291
			6.405	0.02706	1e-06	0.97294
			6.41	0.02704	1e-06	0.97296
			6.415	0.02699	1e-06	0.97301
			6.42	0.02692	1e-06	0.97308
			6.425	0.02685	1.00637e-06	0.97315
			6.43	0.02681	2.60562e-06	0.97319
			6.435	0.02679	1.07422e-05	0.9732
			6.44	0.02678	1.79275e-05	0.9732
			6.445	0.02677	2.27045e-05	0.97321
			6.45	0.02674	2.46569e-05	0.97323
			6.455	0.02672	2.48917e-05	0.97326
			6.46	0.0267	2.48511e-05	0.97328
			6.465	0.02669	2.52835e-05	0.97329
			6.47	0.02668	2.59919e-05	0.9733
			6.475	0.02667	2.55932e-05	0.97331
			6.48	0.02663	2.25534e-05	0.97335
			6.485	0.02653	1.61272e-05	0.97345
			6.49	0.02634	7.53172e-06	0.97365
			6.495	0.0261	1.11649e-06	0.9739
			6.5	0.02587	1e-06	0.97413
			6.505	0.02569	1e-06	0.97431
			6.51	0.02554	1e-06	0.97446
			6.515	0.02538	1e-06	0.97462
			6.52	0.0252	1e-06	0.9748
			6.525	0.02499	1e-06	0.97501
			6.53	0.02475	1e-06	0.97525
			6.535	0.0245	1.0682e-06	0.9755
			6.54	0.02424	2.88439e-06	0.97576
			6.545	0.02395	5.55592e-06	0.97604
			6.55	0.02362	7.02156e-06	0.97637
			6.555	0.02322	7.52759e-06	0.97678
			6.56	0.02269	7.05506e-06	0.9773
			6.565	0.02201	5.0646e-06	0.97798
			6.57	0.02123	2.09651e-06	0.97877
			6.575	0.02042	1e-06	0.97958
			6.58	0.01969	1e-06	0.98031
			6.585	0.01916	1e-06	0.98084
			6.59	0.01889	1e-06	0.98111
			6.595	0.01886	1e-06	0.98114
			6.6	0.01905	1.01286e-06	0.98095
			6.605	0.01941	2.28472e-06	0.98059
			6.61	0.0199	4.99703e-06	0.9801
			6.615	0.02051	5.17204e-06	0.97949
			6.62	0.02123	3.90146e-06	0.97877
			6.625	0.02209	1.69999e-06	0.97791
			6.63	0.0231	1e-06	0.9769
			6.635	0.02415	1e-06	0.97585
			6.64	0.02501	1e-06	0.97499
			6.645	0.02558	1e-06	0.97442
			6.65	0.02593	1e-06	0.97407
			6.655	0.02614	1e-06	0.97386
			6.66	0.0263	1e-06	0.9737
			6.665	0.02643	1e-06	0.97357
			6.67	0.02655	1e-06	0.97345
			6.675	0.02664	1e-06	0.97336
			6.68	0.02671	1e-06	0.97329
			6.685	0.02676	1e-06	0.97324
			6.69	0.02678	1.0807e-06	0.97322
			6.695	0.0268	8.398e-06	0.97319
			6.7	0.0268	1.69016e-05	0.97319
			6.705	0.02676	2.28017e-05	0.97322
			6.71	0.02668	2.51055e-05	0.9733
			6.715	0.02654	2.34843e-05	0.97344
			6.72	0.02635	1.8519e-05	0.97363
			6.725	0.02614	1.15769e-05	0.97385
			6.73	0.02594	4.38934e-06	0.97406
			6.735	0.02574	1e-06	0.97426
			6.74	0.02556	1e-06	0.97444
			6.745	0.02537	1e-06	0.97463
			6.75	0.02518	1e-06	0.97481
			6.755	0.025	1e-06	0.975
			6.76	0.02483	1e-06	0.97517
			6.765	0.02467	1e-06	0.97533
			6.77	0.02452	1e-06	0.97547
			6.775	0.02438	1.00325e-06	0.97562
			6.78	0.02424	1.4211e-06	0.97576
			6.785	0.0241	3.89089e-06	0.97589
			6.79	0.02398	7.4124e-06	0.97602
			6.795	0.02388	9.30637e-06	0.97611
			6.8	0.02382	8.93311e-06	0.97617
			6.805	0.02378	6.77013e-06	0.97621
			6.81	0.02377	4.12067e-06	0.97622
			6.815	0.02377	2.33799e-06	0.97623
			6.82	0.02378	2.08932e-06	0.97622
			6.825	0.0238	3.30728e-06	0.9762
			6.83	0.02382	5.32635e-06	0.97617
			6.835	0.02385	7.27617e-06	0.97614
			6.84	0.02389	8.5369e-06	0.97611
			6.845	0.02393	9.00565e-06	0.97606
			6.85	0.02399	9.06266e-06	0.976
			6.855	0.02408	9.33028e-06	0.97592
			6.86	0.02419	1.00714e-05	0.9758
			6.865	0.02431	1.09788e-05	0.97568
			6.87	0.02444	1.14608e-05	0.97555
			6.875	0.02455	1.11772e-05	0.97544
			6.88	0.02466	1.02629e-05	0.97533
			6.885	0.02477	9.09192e-06	0.97522
			6.89	0.02488	7.95794e-06	0.97511
			6.895	0.02499	6.91014e-06	0.975
			6.9	0.02512	5.79832e-06	0.97488
			6.905	0.02524	4.47405e-06	0.97475
			6.91	0.02537	3.02321e-06	0.97463
			6.915	0.02549	1.7777e-06	0.97451
			6.92	0.0256	1.15059e-06	0.9744
			6.925	0.0257	1.3847e-06	0.9743
			6.93	0.02578	2.40533e-06	0.97421
			6.935	0.02587	3.85087e-06	0.97413
			6.94	0.02594	5.24362e-06	0.97405
			6.945	0.02601	6.21134e-06	0.97398
			6.95	0.02607	6.66564e-06	0.97392
			6.955	0.02613	6.85039e-06	0.97386
			6.96	0.02618	7.16547e-06	0.97381
			6.965	0.02622	7.85865e-06	0.97377
			6.97	0.02625	8.72632e-06	0.97374
			6.975	0.02627	9.25598e-06	0.97372
			6.98	0.02628	9.02993e-06	0.97371
			6.985	0.02628	8.01107e-06	0.97371
			6.99	0.02627	6.57424e-06	0.97373
			6.995	0.02625	5.31598e-06	0.97375
			7	0.02623	4.75505e-06	0.97377
			7.005	0.0262	5.05503e-06	0.97379
			7.01	0.02618	5.94963e-06	0.97382
			7.015	0.02615	6.8937e-06	0.97384
			7.02	0.02612	7.34192e-06	0.97387
			7.025	0.02608	7.02081e-06	0.97391
			7.03	0.02604	6.06282e-06	0.97396
			7.035	0.02597	4.94717e-06	0.97402
			7.04	0.02589	4.28107e-06	0.97411
			7.045	0.0258	4.51612e-06	0.9742
			7.05	0.0257	5.73229e-06	0.97429
			7.055	0.02561	7.65499e-06	0.97438
			7.06	0.02555	9.9109e-06	0.97444
			7.065	0.0255	1.22461e-05	0.97449
			7.07	0.02547	1.45398e-05	0.97451
			7.075	0.02547	1.66277e-05	0.97452
			7.08	0.02547	1.81687e-05	0.97451
			7.085	0.02549	1.865e-05	0.9745
			7.09	0.02551	1.75335e-05	0.97447
			7.095	0.02553	1.45126e-05	0.97445
			7.1	0.02556	9.72572e-06	0.97443
			7.105	0.02558	4.2083e-06	0.97442
			7.11	0.02559	1e-06	0.97441
			7.115	0.02559	1e-06	0.97441
			7.12	0.02559	1e-06	0.97441
			7.125	0.02557	1e-06	0.97442
			7.13	0.02555	1e-06	0.97444
			7.135	0.02553	1e-06	0.97447
			7.14	0.02549	1e-06	0.97451
			7.145	0.02545	1e-06	0.97455
			7.15	0.02538	1.00142e-06	0.97461
			7.155	0.0253	1.18821e-06	0.9747
			7.16	0.0252	3.47389e-06	0.97479
			7.165	0.02509	6.85599e-06	0.97491
			7.17	0.02497	9.22859e-06	0.97503
			7.175	0.02484	1.02914e-05	0.97515
			7.18	0.02472	1.01328e-05	0.97527
			7.185	0.0246	9.17868e-06	0.97539
			7.19	0.02448	7.96643e-06	0.97552
			7.195	0.02435	6.9193e-06	0.97564
			7.2	0.02422	6.19578e-06	0.97577
			7.205	0.0241	5.67105e-06	0.9759
			7.21	0.02398	4.99813e-06	0.97601
			7.215	0.02389	3.86485e-06	0.97611
			7.22	0.02382	2.19286e-06	0.97618
			7.225	0.02378	1.17955e-06	0.97622
			7.23	0.02377	1e-06	0.97623
			7.235	0.02378	1e-06	0.97622
			7.24	0.02381	1e-06	0.97619
			7.245	0.02385	1e-06	0.97614
			7.25	0.02391	1e-06	0.97609
			7.255	0.02397	1e-06	0.97603
			7.26	0.02404	1e-06	0.97596
			7.265	0.0241	1e-06	0.9759
			7.27	0.02417	1e-06	0.97583
			7.275	0.02424	1e-06	0.97576
			7.28	0.02431	1e-06	0.97569
			7.285	0.02438	1.00461e-06	0.97562
			7.29	0.02444	1.37031e-06	0.97556
			7.295	0.0245	2.23351e-06	0.9755
			7.3	0.02455	3.02692e-06	0.97545
			7.305	0.02458	3.81689e-06	0.97541
			7.31	0.02461	4.87991e-06	0.97539
			7.315	0.02462	6.27005e-06	0.97537
			7.32	0.02463	7.72436e-06	0.97536
			7.325	0.02464	8.70414e-06	0.97535
			7.33	0.02467	8.55635e-06	0.97532
			7.335	0.02471	6.80566e-06	0.97528
			7.34	0.02478	3.57667e-06	0.97522
			7.345	0.02486	1e-06	0.97514
			7.35	0.02496	1e-06	0.97504
			7.355	0.02506	1e-06	0.97494
			7.36	0.02516	1e-06	0.97484
			7.365	0.02524	1e-06	0.97476
			7.37	0.02529	1e-06	0.9747
			7.375	0.02533	1e-06	0.97467
			7.38	0.02533	1e-06	0.97467
			7.385	0.02531	1.01517e-06	0.97469
			7.39	0.02526	2.29364e-06	0.97474
			7.395	0.0252	6.5717e-06	0.97479
			7.4	0.02513	1.17303e-05	0.97485
			7.405	0.02506	1.5643e-05	0.97492
			7.41	0.025	1.78053e-05	0.97498
			7.415	0.02494	1.80334e-05	0.97504
			7.42	0.02489	1.6548e-05	0.97509
			7.425	0.02485	1.39021e-05	0.97514
			7.43	0.02482	1.07938e-05	0.97517
			7.435	0.0248	7.83851e-06	0.97519
			7.44	0.02479	5.40053e-06	0.97521
			7.445	0.02479	3.55217e-06	0.97521
			7.45	0.02479	2.16376e-06	0.97521
			7.455	0.0248	1.12549e-06	0.9752
			7.46	0.02481	1e-06	0.97519
			7.465	0.02482	1.00524e-06	0.97518
			7.47	0.02482	1.45898e-06	0.97518
			7.475	0.02481	3.40006e-06	0.97518
			7.48	0.0248	6.61709e-06	0.97519
			7.485	0.02479	1.0365e-05	0.9752
			7.49	0.02477	1.39345e-05	0.97522
			7.495	0.02476	1.66654e-05	0.97523
			7.5	0.02474	1.81722e-05	0.97524
			7.505	0.02472	1.84849e-05	0.97526
			7.51	0.02471	1.80265e-05	0.97528
			7.515	0.02468	1.74868e-05	0.9753
			7.52	0.02465	1.76477e-05	0.97533
			7.525	0.02462	1.88297e-05	0.97536
			7.53	0.02458	2.09483e-05	0.9754
			7.535	0.02453	2.36136e-05	0.97545
			7.54	0.02448	2.62433e-05	0.97549
			7.545	0.02442	2.84256e-05	0.97555
			7.55	0.02436	2.99937e-05	0.97561
			7.555	0.02429	3.09905e-05	0.97568
			7.56	0.02422	3.16197e-05	0.97575
			7.565	0.02413	3.21024e-05	0.97583
			7.57	0.02404	3.25378e-05	0.97593
			7.575	0.02394	3.27306e-05	0.97603
			7.58	0.02382	3.22554e-05	0.97614
			7.585	0.0237	3.06831e-05	0.97627
			7.59	0.02358	2.77299e-05	0.97639
			7.595	0.02345	2.33677e-05	0.97652
			7.6	0.02333	1.78459e-05	0.97665
			7.605	0.02321	1.16343e-05	0.97678
			7.61	0.02309	5.5136e-06	0.97691
			7.615	0.02297	1e-06	0.97703
			7.62	0.02287	1e-06	0.97713
			7.625	0.02277	1e-06	0.97723
			7.63	0.02268	1e-06	0.97732
			7.635	0.02259	1e-06	0.9774
			7.64	0.02252	1e-06	0.97748
			7.645	0.02244	1e-06	0.97756
			7.65	0.02237	1e-06	0.97762
			7.655	0.02231	1.00343e-06	0.97769
			7.66	0.02226	1.17819e-06	0.97774
			7.665	0.02222	2.43701e-06	0.97778
			7.67	0.02219	7.17192e-06	0.9778
			7.675	0.02217	1.21757e-05	0.97781
			7.68	0.02218	1.72682e-05	0.97781
			7.685	0.02219	2.21789e-05	0.97779
			7.69	0.02222	2.65659e-05	0.97775
			7.695	0.02226	3.0051e-05	0.97771
			7.7	0.02232	3.22727e-05	0.97765
			7.705	0.02238	3.29576e-05	0.97759
			7.71	0.02245	3.18219e-05	0.97752
			7.715	0.02252	2.93348e-05	0.97745
			7.72	0.0226	2.61232e-05	0.97738
			7.725	0.02268	2.27114e-05	0.9773
			7.73	0.02275	1.9558e-05	0.97723
			7.735	0.02283	1.69799e-05	0.97715
			7.74	0.0229	1.50784e-05	0.97708
			7.745	0.02297	1.37243e-05	0.97702
			7.75	0.02303	1.2512e-05	0.97696
			7.755	0.02308	1.1014e-05	0.97691
			7.76	0.02312	9.03896e-06	0.97687
			7.765	0.02316	6.58588e-06	0.97683
			7.77	0.02319	3.83716e-06	0.97681
			7.775	0.02321	1.42106e-06	0.97679
			7.78	0.02322	1.00137e-06	0.97678
			7.785	0.02321	1e-06	0.97679
			7.79	0.02319	1e-06	0.97681
			7.795	0.02316	1e-06	0.97684
			7.8	0.02311	1e-06	0.97689
			7.805	0.02305	1e-06	0.97695
			7.81	0.02299	1e-06	0.97701
			7.815	0.02291	1e-06	0.97709
			7.82	0.02282	1e-06	0.97718
			7.825	0.02272	1e-06	0.97728
			7.83	0.02261	1e-06	0.97739
			7.835	0.02249	1e-06	0.97751
			7.84	0.02236	1e-06	0.97764
			7.845	0.02223	1e-06	0.97777
			7.85	0.02208	1e-06	0.97792
			7.855	0.02193	1e-06	0.97807
			7.86	0.02177	1e-06	0.97823
			7.865	0.0216	1e-06	0.9784
			7.87	0.02143	1e-06	0.97857
			7.875	0.02124	1e-06	0.97876
			7.88	0.02105	1e-06	0.97895
			7.885	0.02085	1e-06	0.97915
			7.89	0.02064	1e-06	0.97936
			7.895	0.02043	1e-06	0.97957
			7.9	0.02023	1e-06	0.97977
			7.905	0.02003	1e-06	0.97997
			7.91	0.01984	1e-06	0.98016
			7.915	0.01967	1e-06	0.98033
			7.92	0.01952	1e-06	0.98048
			7.925	0.0194	1e-06	0.98059
			7.93	0.01932	1e-06	0.98067
			7.935	0.01929	1e-06	0.98071
			7.94	0.0193	1e-06	0.9807
			7.945	0.01937	1e-06	0.98062
			7.95	0.0195	1e-06	0.9805
			7.955	0.01967	1.02537e-06	0.98033
			7.96	0.01989	2.07665e-06	0.98011
			7.965	0.02015	7.88328e-06	0.97984
			7.97	0.02045	1.25051e-05	0.97954
			7.975	0.02077	1.57721e-05	0.97921
			7.98	0.02112	1.76863e-05	0.97887
			7.985	0.02147	1.83155e-05	0.97852
			7.99	0.02182	1.77681e-05	0.97816
			7.995	0.02217	1.60183e-05	0.97782
			8	0.0225	1.35677e-05	0.97749
			8.005	0.02282	1.06998e-05	0.97717
			8.01	0.02312	7.64072e-06	0.97687
			8.015	0.0234	4.60665e-06	0.9766
			8.02	0.02365	1.88412e-06	0.97635
			8.025	0.02388	1.15472e-06	0.97612
			8.03	0.02409	1e-06	0.97591
			8.035	0.02428	1e-06	0.97572
			8.04	0.02445	1e-06	0.97555
			8.045	0.0246	1e-06	0.9754
			8.05	0.02474	1e-06	0.97526
			8.055	0.02487	1e-06	0.97513
			8.06	0.02499	1e-06	0.97501
			8.065	0.0251	1e-06	0.9749
			8.07	0.02521	1e-06	0.97478
			8.075	0.02532	1e-06	0.97468
			8.08	0.02543	1e-06	0.97457
			8.085	0.02554	1e-06	0.97446
			8.09	0.02564	1e-06	0.97436
			8.095	0.02575	1e-06	0.97425
			8.1	0.02586	1e-06	0.97414
			8.105	0.02597	1.00277e-06	0.97403
			8.11	0.02607	1.16344e-06	0.97393
			8.115	0.02618	1.76045e-06	0.97382
			8.12	0.02628	4.60142e-06	0.97372
			8.125	0.02638	7.50656e-06	0.97361
			8.13	0.02648	1.01616e-05	0.97351
			8.135	0.02657	1.2297e-05	0.97342
			8.14	0.02666	1.35626e-05	0.97333
			8.145	0.02675	1.3566e-05	0.97324
			8.15	0.02683	1.27057e-05	0.97316
			8.155	0.02691	1.11778e-05	0.97308
			8.16	0.02699	9.20492e-06	0.97301
			8.165	0.02706	7.129e-06	0.97294
			8.17	0.02713	5.3205e-06	0.97287
			8.175	0.02719	3.82309e-06	0.97281
			8.18	0.02725	2.63127e-06	0.97274
			8.185	0.02731	1.69788e-06	0.97269
			8.19	0.02737	1.17469e-06	0.97263
			8.195	0.02742	1e-06	0.97258
			8.2	0.02747	1e-06	0.97253
			8.205	0.02752	1e-06	0.97248
			8.21	0.02757	1e-06	0.97243
			8.215	0.02762	1.01077e-06	0.97238
			8.22	0.02766	1.66833e-06	0.97234
			8.225	0.02771	3.57122e-06	0.97229
			8.23	0.02775	8.12608e-06	0.97224
			8.235	0.02779	1.39889e-05	0.9722
			8.24	0.02783	2.05491e-05	0.97215
			8.245	0.02786	2.74931e-05	0.97211
			8.25	0.02789	3.44047e-05	0.97208
			8.255	0.02791	4.04775e-05	0.97205
			8.26	0.02793	4.55294e-05	0.97202
			8.265	0.02794	4.94076e-05	0.97201
			8.27	0.02795	5.19194e-05	0.972
			8.275	0.02795	5.24885e-05	0.972
			8.28	0.02794	5.17713e-05	0.97201
			8.285	0.02792	4.98575e-05	0.97203
			8.29	0.02789	4.68395e-05	0.97206
			8.295	0.02784	4.25497e-05	0.97211
			8.3	0.02778	3.77158e-05	0.97218
			8.305	0.02771	3.25517e-05	0.97226
			8.31	0.02762	2.72873e-05	0.97235
			8.315	0.02752	2.36216e-05	0.97246
			8.32	0.02739	2.04928e-05	0.97259
			8.325	0.02725	1.80566e-05	0.97273
			8.33	0.02709	1.64645e-05	0.9729
			8.335	0.0269	1.62581e-05	0.97309
			8.34	0.02669	1.68431e-05	0.9733
			8.345	0.02646	1.80167e-05	0.97352
			8.35	0.02621	1.96051e-05	0.97377
			8.355	0.02594	2.10851e-05	0.97404
			8.36	0.02565	2.20436e-05	0.97433
			8.365	0.02535	2.2352e-05	0.97463
			8.37	0.02504	2.17992e-05	0.97493
			8.375	0.02474	2.01364e-05	0.97524
			8.38	0.02444	1.804e-05	0.97555
			8.385	0.02415	1.57477e-05	0.97584
			8.39	0.02388	1.36332e-05	0.97611
			8.395	0.02365	1.24458e-05	0.97634
			8.4	0.02346	1.21512e-05	0.97653
			8.405	0.0233	1.27609e-05	0.97669
			8.41	0.0232	1.44292e-05	0.97678
			8.415	0.02317	1.65087e-05	0.97681
			8.42	0.02319	1.84839e-05	0.97679
			8.425	0.02326	2.0107e-05	0.97672
			8.43	0.0234	2.05683e-05	0.97658
			8.435	0.0236	2.00052e-05	0.97638
			8.44	0.02384	1.86594e-05	0.97615
			8.445	0.02411	1.66128e-05	0.97587
			8.45	0.02443	1.43763e-05	0.97556
			8.455	0.02475	1.24954e-05	0.97523
			8.46	0.02509	1.10939e-05	0.9749
			8.465	0.02543	1.05471e-05	0.97456
			8.47	0.02576	1.07148e-05	0.97423
			8.475	0.02607	1.11076e-05	0.97391
			8.48	0.02637	1.15468e-05	0.97362
			8.485	0.02662	1.12295e-05	0.97337
			8.49	0.02685	9.88687e-06	0.97314
			8.495	0.02704	7.53398e-06	0.97295
			8.5	0.0272	3.87467e-06	0.9728
			8.505	0.02732	1.90027e-06	0.97268
			8.51	0.02741	1e-06	0.97259
			8.515	0.02748	1e-06	0.97251
			8.52	0.02753	1e-06	0.97247
			8.525	0.02755	1e-06	0.97244
			8.53	0.02757	1e-06	0.97243
			8.535	0.02757	1e-06	0.97243
			8.54	0.02756	1e-06	0.97244
			8.545	0.02755	1e-06	0.97245
			8.55	0.02753	1e-06	0.97246
			8.555	0.02751	1e-06	0.97249
			8.56	0.02749	1e-06	0.97251
			8.565	0.02746	1e-06	0.97254
			8.57	0.02743	1e-06	0.97257
			8.575	0.0274	1.02215e-06	0.9726
			8.58	0.02737	2.1147e-06	0.97263
			8.585	0.02733	4.75985e-06	0.97266
			8.59	0.0273	8.14902e-06	0.97269
			8.595	0.02726	1.09464e-05	0.97273
			8.6	0.02722	1.31298e-05	0.97276
			8.605	0.02718	1.43939e-05	0.9728
			8.61	0.02714	1.50635e-05	0.97285
			8.615	0.02709	1.53542e-05	0.97289
			8.62	0.02704	1.52929e-05	0.97294
			8.625	0.02699	1.50496e-05	0.97299
			8.63	0.02694	1.47241e-05	0.97304
			8.635	0.02689	1.43281e-05	0.97309
			8.64	0.02684	1.37181e-05	0.97315
			8.645	0.02679	1.29027e-05	0.9732
			8.65	0.02673	1.18748e-05	0.97326
			8.655	0.02668	1.04694e-05	0.97331
			8.66	0.02662	8.92387e-06	0.97337
			8.665	0.02657	7.35352e-06	0.97342
			8.67	0.02652	5.96821e-06	0.97348
			8.675	0.02646	5.17623e-06	0.97353
			8.68	0.02641	4.94735e-06	0.97358
			8.685	0.02636	5.56029e-06	0.97363
			8.69	0.02631	7.32868e-06	0.97368
			8.695	0.02626	9.74332e-06	0.97373
			8.7	0.02622	1.28367e-05	0.97377
			8.705	0.02617	1.65189e-05	0.97381
			8.71	0.02613	2.02527e-05	0.97385
			8.715	0.02608	2.3993e-05	0.97389
			8.72	0.02604	2.72632e-05	0.97393
			8.725	0.02599	3.00974e-05	0.97398
			8.73	0.02595	3.25005e-05	0.97402
			8.735	0.0259	3.40599e-05	0.97406
			8.74	0.02585	3.50473e-05	0.97411
			8.745	0.0258	3.55433e-05	0.97416
			8.75	0.02575	3.52458e-05	0.97421
			8.755	0.0257	3.43669e-05	0.97427
			8.76	0.02564	3.30881e-05	0.97433
			8.765	0.02558	3.13535e-05	0.97439
			8.77	0.02552	2.92338e-05	0.97446
			8.775	0.02545	2.69167e-05	0.97452
			8.78	0.02538	2.44749e-05	0.97459
			8.785	0.02531	2.22672e-05	0.97467
			8.79	0.02524	2.03203e-05	0.97474
			8.795	0.02517	1.8916e-05	0.97481
			8.8	0.0251	1.81593e-05	0.97489
			8.805	0.02502	1.77852e-05	0.97496
			8.81	0.02495	1.78967e-05	0.97503
			8.815	0.02489	1.81347e-05	0.9751
			8.82	0.02482	1.83071e-05	0.97516
			8.825	0.02475	1.81896e-05	0.97523
			8.83	0.02469	1.74718e-05	0.97529
			8.835	0.02464	1.63517e-05	0.97535
			8.84	0.02458	1.46141e-05	0.9754
			8.845	0.02454	1.24673e-05	0.97545
			8.85	0.02449	1.0168e-05	0.9755
			8.855	0.02445	7.80849e-06	0.97554
			8.86	0.02441	5.68507e-06	0.97558
			8.865	0.02438	3.75757e-06	0.97562
			8.87	0.02435	2.21878e-06	0.97565
			8.875	0.02433	1.40943e-06	0.97567
			8.88	0.02431	1e-06	0.97569
			8.885	0.0243	1e-06	0.9757
			8.89	0.0243	1e-06	0.9757
			8.895	0.0243	1e-06	0.9757
			8.9	0.02431	1e-06	0.97569
			8.905	0.02432	1.00187e-06	0.97568
			8.91	0.02434	1.03633e-06	0.97566
			8.915	0.02436	1.42148e-06	0.97563
			8.92	0.0244	3.27346e-06	0.9756
			8.925	0.02443	6.33303e-06	0.97556
			8.93	0.02447	1.00037e-05	0.97552
			8.935	0.02452	1.35344e-05	0.97546
			8.94	0.02457	1.69129e-05	0.97541
			8.945	0.02463	1.9103e-05	0.97535
			8.95	0.02469	2.04748e-05	0.97529
			8.955	0.02476	2.0716e-05	0.97522
			8.96	0.02482	1.94465e-05	0.97516
			8.965	0.02489	1.76115e-05	0.97509
			8.97	0.02496	1.50846e-05	0.97503
			8.975	0.02503	1.2689e-05	0.97496
			8.98	0.0251	1.0574e-05	0.97489
			8.985	0.02518	9.4218e-06	0.97482
			8.99	0.02525	9.31736e-06	0.97474
			8.995	0.02533	9.90655e-06	0.97466
			9	0.02541	1.1695e-05	0.97458
			9.005	0.02549	1.36959e-05	0.9745
			9.01	0.02557	1.5892e-05	0.97441
			9.015	0.02566	1.75343e-05	0.97432
			9.02	0.02575	1.86995e-05	0.97424
			9.025	0.02583	1.9158e-05	0.97415
			9.03	0.02592	1.87491e-05	0.97406
			9.035	0.02601	1.80663e-05	0.97397
			9.04	0.0261	1.71296e-05	0.97388
			9.045	0.02619	1.66011e-05	0.9738
			9.05	0.02627	1.63936e-05	0.97371
			9.055	0.02635	1.73603e-05	0.97363
			9.06	0.02643	1.90309e-05	0.97356
			9.065	0.0265	2.1369e-05	0.97348
			9.07	0.02657	2.44424e-05	0.97341
			9.075	0.02663	2.75099e-05	0.97334
			9.08	0.02669	3.04606e-05	0.97328
			9.085	0.02674	3.25677e-05	0.97323
			9.09	0.02678	3.41287e-05	0.97319
			9.095	0.02682	3.4296e-05	0.97315
			9.1	0.02685	3.35049e-05	0.97312
			9.105	0.02688	3.19869e-05	0.97309
			9.11	0.0269	2.92122e-05	0.97307
			9.115	0.02692	2.61274e-05	0.97305
			9.12	0.02693	2.258e-05	0.97304
			9.125	0.02695	1.88481e-05	0.97303
			9.13	0.02696	1.50814e-05	0.97303
			9.135	0.02697	1.14092e-05	0.97302
			9.14	0.02697	7.96171e-06	0.97302
			9.145	0.02698	4.69646e-06	0.97301
			9.15	0.02699	2.46024e-06	0.973
			9.155	0.027	1e-06	0.97299
			9.16	0.02702	1e-06	0.97298
			9.165	0.02703	1.01118e-06	0.97297
			9.17	0.02705	1.18087e-06	0.97295
			9.175	0.02708	2.91201e-06	0.97292
			9.18	0.0271	6.08059e-06	0.97289
			9.185	0.02714	1.08885e-05	0.97285
			9.19	0.02718	1.68675e-05	0.97281
			9.195	0.02722	2.31241e-05	0.97276
			9.2	0.02726	2.96025e-05	0.97271
			9.205	0.02731	3.55068e-05	0.97265
			9.21	0.02737	4.09942e-05	0.97259
			9.215	0.02742	4.45528e-05	0.97254
			9.22	0.02747	4.71891e-05	0.97248
			9.225	0.02753	4.80167e-05	0.97243
			9.23	0.02758	4.70678e-05	0.97238
			9.235	0.02762	4.51824e-05	0.97233
			9.24	0.02767	4.10767e-05	0.97229
			9.245	0.0277	3.63354e-05	0.97226
			9.25	0.02774	3.05528e-05	0.97223
			9.255	0.02777	2.40425e-05	0.97221
			9.26	0.02779	1.72484e-05	0.97219
			9.265	0.02781	1.02523e-05	0.97218
			9.27	0.02782	4.88688e-06	0.97217
			9.275	0.02783	1.73832e-06	0.97217
			9.28	0.02784	1e-06	0.97216
			9.285	0.02784	1e-06	0.97216
			9.29	0.02784	1e-06	0.97216
			9.295	0.02783	1e-06	0.97217
			9.3	0.02782	1e-06	0.97218
			9.305	0.02781	1.0329e-06	0.97219
			9.31	0.0278	1.55423e-06	0.9722
			9.315	0.02779	6.21204e-06	0.97221
			9.32	0.02777	1.3095e-05	0.97222
			9.325	0.02775	2.29151e-05	0.97223
			9.33	0.02773	3.23834e-05	0.97224
			9.335	0.02771	4.15582e-05	0.97225
			9.34	0.02769	4.86289e-05	0.97226
			9.345	0.02767	5.43629e-05	0.97228
			9.35	0.02764	5.80494e-05	0.9723
			9.355	0.02761	5.93425e-05	0.97233
			9.36	0.02758	5.9605e-05	0.97236
			9.365	0.02755	5.75561e-05	0.97239
			9.37	0.02752	5.5247e-05	0.97243
			9.375	0.02748	5.24083e-05	0.97246
			9.38	0.02745	5.00201e-05	0.9725
			9.385	0.02741	4.78907e-05	0.97254
			9.39	0.02737	4.72541e-05	0.97259
			9.395	0.02732	4.71038e-05	0.97263
			9.4	0.02728	4.81924e-05	0.97267
			9.405	0.02723	4.97778e-05	0.97272
			9.41	0.02719	5.17924e-05	0.97276
			9.415	0.02714	5.36939e-05	0.97281
			9.42	0.02709	5.54337e-05	0.97285
			9.425	0.02704	5.61665e-05	0.9729
			9.43	0.02699	5.6165e-05	0.97295
			9.435	0.02694	5.50943e-05	0.97301
			9.44	0.02689	5.26277e-05	0.97306
			9.445	0.02684	4.95398e-05	0.97311
			9.45	0.02679	4.46532e-05	0.97317
			9.455	0.02674	3.9362e-05	0.97322
			9.46	0.02669	3.30022e-05	0.97328
			9.465	0.02664	2.62152e-05	0.97334
			9.47	0.02659	1.90412e-05	0.97339
			9.475	0.02654	1.18331e-05	0.97344
			9.48	0.0265	4.94022e-06	0.9735
			9.485	0.02645	2.57924e-06	0.97355
			9.49	0.02641	1e-06	0.97359
			9.495	0.02636	1e-06	0.97364
			9.5	0.02632	1e-06	0.97368
			9.505	0.02628	1e-06	0.97372
			9.51	0.02624	1e-06	0.97376
			9.515	0.0262	1e-06	0.9738
			9.52	0.02616	1e-06	0.97383
			9.525	0.02613	1e-06	0.97387
			9.53	0.02611	1e-06	0.97389
			9.535	0.02609	1.00536e-06	0.97391
			9.54	0.02608	1.01414e-06	0.97392
			9.545	0.02607	1.86328e-06	0.97393
			9.55	0.02607	2.9748e-06	0.97393
			9.555	0.02608	5.19604e-06	0.97391
			9.56	0.0261	7.13502e-06	0.97389
			9.565	0.02613	8.52492e-06	0.97386
			9.57	0.02617	9.77374e-06	0.97382
			9.575	0.02621	1.09186e-05	0.97378
			9.58	0.02626	1.2373e-05	0.97373
			9.585	0.02632	1.39251e-05	0.97367
			9.59	0.02639	1.6132e-05	0.9736
			9.595	0.02646	1.84564e-05	0.97353
			9.6	0.02653	2.11124e-05	0.97345
			9.605	0.02661	2.36514e-05	0.97336
			9.61	0.0267	2.60682e-05	0.97328
			9.615	0.02679	2.77276e-05	0.97319
			9.62	0.02688	2.90744e-05	0.9731
			9.625	0.02697	2.88664e-05	0.97301
			9.63	0.02706	2.82796e-05	0.97291
			9.635	0.02715	2.61214e-05	0.97283
			9.64	0.02724	2.34429e-05	0.97274
			9.645	0.02732	1.97939e-05	0.97266
			9.65	0.02741	1.56527e-05	0.97258
			9.655	0.02749	1.1121e-05	0.9725
			9.66	0.02757	6.43199e-06	0.97242
			9.665	0.02765	1.69746e-06	0.97235
			9.67	0.02772	1.23678e-06	0.97228
			9.675	0.02779	1e-06	0.97221
			9.68	0.02785	1e-06	0.97215
			9.685	0.02791	1e-06	0.97209
			9.69	0.02797	1e-06	0.97203
			9.695	0.02802	1e-06	0.97198
			9.7	0.02806	1e-06	0.97193
			9.705	0.02811	1e-06	0.97189
			9.71	0.02815	1e-06	0.97185
			9.715	0.02818	1e-06	0.97182
			9.72	0.02821	1e-06	0.97178
			9.725	0.02824	1e-06	0.97176
			9.73	0.02827	1e-06	0.97173
			9.735	0.02829	1e-06	0.97171
			9.74	0.02831	1e-06	0.97169
			9.745	0.02833	1e-06	0.97167
			9.75	0.02834	1e-06	0.97166
			9.755	0.02835	1e-06	0.97165
			9.76	0.02836	1e-06	0.97164
			9.765	0.02837	1e-06	0.97163
			9.77	0.02837	1e-06	0.97163
			9.775	0.02837	1e-06	0.97163
			9.78	0.02837	1e-06	0.97163
			9.785	0.02837	1e-06	0.97163
			9.79	0.02836	1e-06	0.97164
			9.795	0.02835	1e-06	0.97165
			9.8	0.02834	1e-06	0.97166
			9.805	0.02833	1e-06	0.97167
			9.81	0.02832	1e-06	0.97168
			9.815	0.0283	1e-06	0.9717
			9.82	0.02829	1e-06	0.97171
			9.825	0.02828	1e-06	0.97172
			9.83	0.02826	1e-06	0.97174
			9.835	0.02826	1e-06	0.97174
			9.84	0.02825	1e-06	0.97175
			9.845	0.02825	1e-06	0.97175
			9.85	0.02826	1.00129e-06	0.97174
			9.855	0.02827	1.00658e-06	0.97173
			9.86	0.02828	1.24347e-06	0.97172
			9.865	0.02831	1.87054e-06	0.97169
			9.87	0.02834	3.09392e-06	0.97166
			9.875	0.02838	4.92133e-06	0.97162
			9.88	0.02842	6.00858e-06	0.97158
			9.885	0.02847	6.63629e-06	0.97153
			9.89	0.02852	6.59668e-06	0.97147
			9.895	0.02857	6.31509e-06	0.97142
			9.9	0.02863	5.60987e-06	0.97137
			9.905	0.02868	4.82884e-06	0.97131
			9.91	0.02874	4.07552e-06	0.97126
			9.915	0.02879	3.36008e-06	0.97121
			9.92	0.02883	3.18013e-06	0.97117
			9.925	0.02887	3.1572e-06	0.97113
			9.93	0.0289	3.92728e-06	0.97109
			9.935	0.02893	4.94975e-06	0.97106
			9.94	0.02895	6.6773e-06	0.97104
			9.945	0.02896	8.59414e-06	0.97103
			9.95	0.02897	1.08492e-05	0.97102
			9.955	0.02898	1.30058e-05	0.97101
			9.96	0.02898	1.50419e-05	0.97101
			9.965	0.02897	1.65415e-05	0.97101
			9.97	0.02897	1.75816e-05	0.97101
			9.975	0.02896	1.77143e-05	0.97102
			9.98	0.02895	1.72978e-05	0.97103
			9.985	0.02894	1.59076e-05	0.97104
			9.99	0.02894	1.4108e-05	0.97105
			9.995	0.02893	1.16822e-05	0.97106
			10	0.02892	9.08163e-06	0.97107
			10.005	0.02891	6.51787e-06	0.97108
			10.01	0.0289	3.96261e-06	0.9711
			10.015	0.02889	2.44561e-06	0.97111
			10.02	0.02888	1.01702e-06	0.97112
			10.025	0.02887	1e-06	0.97113
			10.03	0.02886	1.00014e-06	0.97114
			10.035	0.02885	1.00294e-06	0.97115
			10.04	0.02884	1.0415e-06	0.97116
			10.045	0.02883	1.37522e-06	0.97117
			10.05	0.02882	1.78737e-06	0.97118
			10.055	0.0288	2.60548e-06	0.97119
			10.06	0.02879	3.28064e-06	0.97121
			10.065	0.02878	3.43026e-06	0.97122
			10.07	0.02877	3.32217e-06	0.97123
			10.075	0.02875	2.48065e-06	0.97125
			10.08	0.02874	1.75611e-06	0.97126
			10.085	0.02873	1.29994e-06	0.97127
			10.09	0.02871	1e-06	0.97129
			10.095	0.0287	1e-06	0.9713
			10.1	0.02869	1e-06	0.97131
			10.105	0.02867	1e-06	0.97132
			10.11	0.02866	1e-06	0.97134
			10.115	0.02865	1e-06	0.97135
			10.12	0.02864	1e-06	0.97136
			10.125	0.02863	1e-06	0.97137
			10.13	0.02862	1e-06	0.97138
			10.135	0.02861	1e-06	0.97139
			10.14	0.0286	1e-06	0.9714
			10.145	0.02859	1e-06	0.97141
			10.15	0.02858	1e-06	0.97142
			10.155	0.02857	1e-06	0.97142
			10.16	0.02857	1e-06	0.97143
			10.165	0.02856	1e-06	0.97144
			10.17	0.02855	1e-06	0.97145
			10.175	0.02854	1e-06	0.97146
			10.18	0.02853	1e-06	0.97147
			10.185	0.02852	1e-06	0.97148
			10.19	0.02851	1e-06	0.97149
			10.195	0.0285	1e-06	0.9715
			10.2	0.02849	1e-06	0.97151
			10.205	0.02848	1e-06	0.97152
			10.21	0.02847	1e-06	0.97153
			10.215	0.02845	1e-06	0.97154
			10.22	0.02844	1.00145e-06	0.97156
			10.225	0.02843	1.00433e-06	0.97157
			10.23	0.02842	1.22293e-06	0.97158
			10.235	0.02841	1.67042e-06	0.97159
			10.24	0.0284	4.17567e-06	0.9716
			10.245	0.02838	9.04024e-06	0.97161
			10.25	0.02837	1.36223e-05	0.97162
			10.255	0.02836	1.78491e-05	0.97163
			10.26	0.02834	2.14975e-05	0.97164
			10.265	0.02833	2.43315e-05	0.97165
			10.27	0.02831	2.64812e-05	0.97166
			10.275	0.0283	2.75341e-05	0.97168
			10.28	0.02828	2.80338e-05	0.97169
			10.285	0.02827	2.75009e-05	0.97171
			10.29	0.02825	2.6689e-05	0.97172
			10.295	0.02823	2.52538e-05	0.97174
			10.3	0.02822	2.3802e-05	0.97176
			10.305	0.0282	2.23027e-05	0.97178
			10.31	0.02819	2.09139e-05	0.97179
			10.315	0.02817	1.99171e-05	0.97181
			10.32	0.02815	1.90089e-05	0.97183
			10.325	0.02814	1.85396e-05	0.97184
			10.33	0.02812	1.80723e-05	0.97186
			10.335	0.0281	1.76192e-05	0.97188
			10.34	0.02809	1.71293e-05	0.97189
			10.345	0.02807	1.59571e-05	0.97191
			10.35	0.02806	1.4786e-05	0.97193
			10.355	0.02804	1.23934e-05	0.97195
			10.36	0.02803	9.98808e-06	0.97196
			10.365	0.02801	6.51601e-06	0.97198
			10.37	0.028	2.95391e-06	0.972
			10.375	0.02798	1.83496e-06	0.97201
			10.38	0.02797	1.15532e-06	0.97203
			10.385	0.02796	1e-06	0.97204
			10.39	0.02794	1e-06	0.97206
			10.395	0.02793	1e-06	0.97207
			10.4	0.02791	1e-06	0.97209
			10.405	0.0279	1e-06	0.9721
			10.41	0.02788	1e-06	0.97212
			10.415	0.02787	1e-06	0.97213
			10.42	0.02785	1e-06	0.97215
			10.425	0.02784	1e-06	0.97216
			10.43	0.02782	1e-06	0.97218
			10.435	0.0278	1e-06	0.9722
			10.44	0.02779	1e-06	0.97221
			10.445	0.02777	1e-06	0.97223
			10.45	0.02776	1e-06	0.97224
			10.455	0.02774	1e-06	0.97226
			10.46	0.02773	1e-06	0.97227
			10.465	0.02772	1e-06	0.97228
			10.47	0.0277	1e-06	0.9723
			10.475	0.02769	1e-06	0.97231
			10.48	0.02768	1e-06	0.97232
			10.485	0.02767	1e-06	0.97233
			10.49	0.02765	1e-06	0.97234
			10.495	0.02764	1e-06	0.97236
			10.5	0.02763	1e-06	0.97237
			10.505	0.02762	1e-06	0.97238
			10.51	0.0276	1e-06	0.9724
			10.515	0.02759	1e-06	0.97241
			10.52	0.02757	1e-06	0.97243
			10.525	0.02756	1e-06	0.97244
			10.53	0.02754	1e-06	0.97245
			10.535	0.02753	1e-06	0.97247
			10.54	0.02752	1e-06	0.97248
			10.545	0.0275	1e-06	0.9725
			10.55	0.02749	1e-06	0.97251
			10.555	0.02748	1e-06	0.97252
			10.56	0.02746	1e-06	0.97253
			10.565	0.02745	1e-06	0.97254
			10.57	0.02744	1e-06	0.97255
			10.575	0.02744	1e-06	0.97256
			10.58	0.02743	1e-06	0.97257
			10.585	0.02742	1e-06	0.97258
			10.59	0.02741	1e-06	0.97259
			10.595	0.0274	1e-06	0.97259
			10.6	0.0274	1e-06	0.9726
			10.605	0.02739	1e-06	0.97261
			10.61	0.02739	1e-06	0.97261
			10.615	0.02738	1e-06	0.97262
			10.62	0.02737	1e-06	0.97263
			10.625	0.02737	1e-06	0.97263
			10.63	0.02736	1e-06	0.97264
			10.635	0.02736	1e-06	0.97264
			10.64	0.02735	1e-06	0.97265
			10.645	0.02734	1e-06	0.97265
			10.65	0.02734	1e-06	0.97266
			10.655	0.02733	1e-06	0.97267
			10.66	0.02732	1e-06	0.97267
			10.665	0.02732	1e-06	0.97268
			10.67	0.02731	1e-06	0.97269
			10.675	0.0273	1e-06	0.9727
			10.68	0.02729	1e-06	0.97271
			10.685	0.02729	1e-06	0.97271
			10.69	0.02728	1e-06	0.97272
			10.695	0.02727	1e-06	0.97273
			10.7	0.02726	1e-06	0.97274
			10.705	0.02725	1e-06	0.97275
			10.71	0.02725	1e-06	0.97275
			10.715	0.02724	1e-06	0.97276
			10.72	0.02723	1e-06	0.97276
			10.725	0.02723	1e-06	0.97277
			10.73	0.02723	1e-06	0.97277
			10.735	0.02722	1e-06	0.97278
			10.74	0.02722	1e-06	0.97278
			10.745	0.02722	1e-06	0.97278
			10.75	0.02722	1.00274e-06	0.97278
			10.755	0.02721	1.00716e-06	0.97278
			10.76	0.02721	1.14867e-06	0.97279
			10.765	0.02721	1.50479e-06	0.97279
			10.77	0.02721	1.83203e-06	0.97279
			10.775	0.02721	2.00411e-06	0.97279
			10.78	0.02721	2.176e-06	0.97279
			10.785	0.02721	2.34742e-06	0.97279
			10.79	0.02721	2.51863e-06	0.97279
			10.795	0.0272	2.84778e-06	0.97279
			10.8	0.0272	3.25349e-06	0.9728
			10.805	0.0272	3.83697e-06	0.9728
			10.81	0.0272	4.66116e-06	0.9728
			10.815	0.02719	5.60299e-06	0.9728
			10.82	0.02719	7.11494e-06	0.9728
			10.825	0.02719	8.62538e-06	0.9728
			10.83	0.02719	1.06907e-05	0.9728
			10.835	0.02718	1.28058e-05	0.9728
			10.84	0.02718	1.50082e-05	0.9728
			10.845	0.02718	1.72557e-05	0.97281
			10.85	0.02718	1.92478e-05	0.97281
			10.855	0.02717	2.0832e-05	0.97281
			10.86	0.02717	2.22454e-05	0.97281
			10.865	0.02717	2.23245e-05	0.97281
			10.87	0.02717	2.24036e-05	0.97281
			10.875	0.02716	2.077e-05	0.97281
			10.88	0.02716	1.8803e-05	0.97282
			10.885	0.02716	1.57202e-05	0.97282
			10.89	0.02716	1.17442e-05	0.97283
			10.895	0.02716	7.91885e-06	0.97283
			10.9	0.02716	4.49645e-06	0.97283
			10.905	0.02716	1.07703e-06	0.97284
			10.91	0.02716	1e-06	0.97284
			10.915	0.02716	1e-06	0.97283
			10.92	0.02717	1e-06	0.97283
			10.925	0.02717	1e-06	0.97283
			10.93	0.02717	1e-06	0.97283
			10.935	0.02717	1e-06	0.97282
			10.94	0.02718	1e-06	0.97282
			10.945	0.02718	1e-06	0.97282
			10.95	0.02718	1e-06	0.97282
			10.955	0.02718	1e-06	0.97282
			10.96	0.02718	1e-06	0.97282
			10.965	0.02718	1e-06	0.97281
			10.97	0.02718	1e-06	0.97282
			10.975	0.02718	1e-06	0.97282
			10.98	0.02718	1e-06	0.97282
			10.985	0.02718	1e-06	0.97282
			10.99	0.02717	1e-06	0.97283
			10.995	0.02716	1e-06	0.97283
			11	0.02716	1e-06	0.97284
			11.005	0.02715	1e-06	0.97285
			11.01	0.02714	1e-06	0.97286
			11.015	0.02713	1e-06	0.97287
			11.02	0.02712	1e-06	0.97288
			11.025	0.02711	1.02197e-06	0.97289
			11.03	0.02709	1.04943e-06	0.97291
			11.035	0.02708	2.64527e-06	0.97292
			11.04	0.02706	6.11796e-06	0.97293
			11.045	0.02705	9.59574e-06	0.97294
			11.05	0.02703	1.31339e-05	0.97296
			11.055	0.02701	1.66683e-05	0.97297
			11.06	0.027	1.80371e-05	0.97299
			11.065	0.02698	1.86841e-05	0.973
			11.07	0.02696	1.79955e-05	0.97302
			11.075	0.02694	1.52222e-05	0.97304
			11.08	0.02692	1.2399e-05	0.97306
			11.085	0.0269	7.53463e-06	0.97309
			11.09	0.02688	2.67464e-06	0.97311
			11.095	0.02686	1e-06	0.97313
			11.1	0.02684	1e-06	0.97315
			11.105	0.02683	1e-06	0.97317
			11.11	0.02681	1e-06	0.97319
			11.115	0.02679	1e-06	0.97321
			11.12	0.02677	1e-06	0.97323
			11.125	0.02675	1e-06	0.97325
			11.13	0.02673	1e-06	0.97327
			11.135	0.02671	1e-06	0.97329
			11.14	0.02669	1e-06	0.97331
			11.145	0.02667	1e-06	0.97333
			11.15	0.02666	1e-06	0.97334
			11.155	0.02664	1e-06	0.97336
			11.16	0.02662	1e-06	0.97338
			11.165	0.02661	1e-06	0.97339
			11.17	0.02659	1e-06	0.97341
			11.175	0.02657	1e-06	0.97343
			11.18	0.02656	1e-06	0.97344
			11.185	0.02654	1e-06	0.97346
			11.19	0.02653	1e-06	0.97347
			11.195	0.02651	1e-06	0.97349
			11.2	0.0265	1e-06	0.9735
			11.205	0.02648	1e-06	0.97352
			11.21	0.02646	1e-06	0.97354
			11.215	0.02645	1e-06	0.97355
			11.22	0.02643	1e-06	0.97357
			11.225	0.02641	1e-06	0.97359
			11.23	0.02639	1e-06	0.97361
			11.235	0.02637	1e-06	0.97363
			11.24	0.02635	1e-06	0.97365
			11.245	0.02632	1e-06	0.97368
			11.25	0.0263	1e-06	0.9737
			11.255	0.02628	1e-06	0.97372
			11.26	0.02625	1e-06	0.97375
			11.265	0.02623	1e-06	0.97377
			11.27	0.0262	1e-06	0.9738
			11.275	0.02618	1e-06	0.97382
			11.28	0.02615	1e-06	0.97385
			11.285	0.02612	1e-06	0.97388
			11.29	0.0261	1e-06	0.9739
			11.295	0.02607	1e-06	0.97393
			11.3	0.02604	1e-06	0.97396
			11.305	0.02601	1e-06	0.97399
			11.31	0.02598	1e-06	0.97401
			11.315	0.02596	1e-06	0.97404
			11.32	0.02593	1e-06	0.97407
			11.325	0.0259	1e-06	0.9741
			11.33	0.02587	1e-06	0.97413
			11.335	0.02584	1e-06	0.97416
			11.34	0.02581	1e-06	0.97419
			11.345	0.02578	1e-06	0.97422
			11.35	0.02575	1e-06	0.97425
			11.355	0.02572	1e-06	0.97427
			11.36	0.0257	1e-06	0.9743
			11.365	0.02567	1e-06	0.97433
			11.37	0.02564	1e-06	0.97436
			11.375	0.02562	1e-06	0.97438
			11.38	0.02559	1e-06	0.97441
			11.385	0.02557	1e-06	0.97443
			11.39	0.02555	1e-06	0.97445
			11.395	0.02552	1e-06	0.97448
			11.4	0.0255	1e-06	0.9745
			11.405	0.02548	1e-06	0.97452
			11.41	0.02546	1e-06	0.97454
			11.415	0.02544	1e-06	0.97455
			11.42	0.02543	1e-06	0.97457
			11.425	0.02541	1.0137e-06	0.97459
			11.43	0.02539	1.0335e-06	0.9746
			11.435	0.02538	1.50067e-06	0.97462
			11.44	0.02536	4.11246e-06	0.97463
			11.445	0.02535	6.72134e-06	0.97464
			11.45	0.02534	9.75852e-06	0.97465
			11.455	0.02533	1.30255e-05	0.97466
			11.46	0.02531	1.61691e-05	0.97467
			11.465	0.0253	1.84188e-05	0.97468
			11.47	0.02529	2.06663e-05	0.97469
			11.475	0.02528	2.26597e-05	0.97469
			11.48	0.02528	2.44714e-05	0.9747
			11.485	0.02527	2.629e-05	0.97471
			11.49	0.02526	2.82947e-05	0.97471
			11.495	0.02525	3.02974e-05	0.97472
			11.5	0.02524	3.2536e-05	0.97472
			11.505	0.02524	3.50136e-05	0.97473
			11.51	0.02523	3.74888e-05	0.97473
			11.515	0.02522	4.0187e-05	0.97474
			11.52	0.02522	4.28957e-05	0.97474
			11.525	0.02521	4.5463e-05	0.97475
			11.53	0.0252	4.78067e-05	0.97475
			11.535	0.0252	5.01481e-05	0.97475
			11.54	0.02519	5.16987e-05	0.97476
			11.545	0.02518	5.30779e-05	0.97477
			11.55	0.02517	5.41538e-05	0.97477
			11.555	0.02517	5.43394e-05	0.97478
			11.56	0.02516	5.45247e-05	0.97478
			11.565	0.02516	5.41144e-05	0.97479
			11.57	0.02515	5.34225e-05	0.9748
			11.575	0.02514	5.27156e-05	0.9748
			11.58	0.02514	5.18664e-05	0.97481
			11.585	0.02514	5.1018e-05	0.97481
			11.59	0.02513	5.05412e-05	0.97482
			11.595	0.02513	5.04194e-05	0.97482
			11.6	0.02513	5.02977e-05	0.97482
			11.605	0.02512	5.14204e-05	0.97483
			11.61	0.02512	5.2652e-05	0.97483
			11.615	0.02512	5.43773e-05	0.97483
			11.62	0.02512	5.71478e-05	0.97483
			11.625	0.02511	5.99165e-05	0.97483
			11.63	0.02511	6.35887e-05	0.97483
			11.635	0.02511	6.76151e-05	0.97483
			11.64	0.0251	7.17096e-05	0.97483
			11.645	0.0251	7.63915e-05	0.97483
			11.65	0.02509	8.10702e-05	0.97483
			11.655	0.02509	8.57241e-05	0.97483
			11.66	0.02508	9.03528e-05	0.97483
			11.665	0.02507	9.49776e-05	0.97483
			11.67	0.02506	9.90209e-05	0.97484
			11.675	0.02506	0.000102973	0.97484
			11.68	0.02505	0.000106654	0.97485
			11.685	0.02504	0.000109489	0.97485
			11.69	0.02503	0.000112321	0.97486
			11.695	0.02502	0.000114306	0.97487
			11.7	0.02501	0.000115746	0.97488
			11.705	0.02499	0.000117186	0.97489
			11.71	0.02498	0.000117149	0.9749
			11.715	0.02497	0.000117067	0.97491
			11.72	0.02495	0.00011648	0.97493
			11.725	0.02494	0.000114845	0.97495
			11.73	0.02492	0.000113211	0.97496
			11.735	0.02491	0.000110606	0.97498
			11.74	0.02489	0.000107531	0.97501
			11.745	0.02487	0.00010444	0.97503
			11.75	0.02485	0.000100196	0.97505
			11.755	0.02483	9.5955e-05	0.97508
			11.76	0.0248	9.14585e-05	0.9751
			11.765	0.02478	8.64916e-05	0.97513
			11.77	0.02476	8.15288e-05	0.97516
			11.775	0.02473	7.64642e-05	0.97519
			11.78	0.02471	7.1356e-05	0.97522
			11.785	0.02468	6.62551e-05	0.97525
			11.79	0.02466	6.16283e-05	0.97528
			11.795	0.02463	5.70062e-05	0.97531
			11.8	0.0246	5.27313e-05	0.97535
			11.805	0.02458	4.91678e-05	0.97538
			11.81	0.02455	4.56073e-05	0.97541
			11.815	0.02452	4.30067e-05	0.97543
			11.82	0.0245	4.09476e-05	0.97546
			11.825	0.02447	3.88899e-05	0.97549
			11.83	0.02445	3.8505e-05	0.97551
			11.835	0.02442	3.82161e-05	0.97554
			11.84	0.0244	3.83854e-05	0.97556
			11.845	0.02438	3.99571e-05	0.97558
			11.85	0.02435	4.15278e-05	0.97561
			11.855	0.02433	4.40426e-05	0.97562
			11.86	0.02431	4.73599e-05	0.97564
			11.865	0.02429	5.06749e-05	0.97565
			11.87	0.02428	5.5165e-05	0.97567
			11.875	0.02426	5.9894e-05	0.97568
			11.88	0.02425	6.47151e-05	0.97568
			11.885	0.02424	7.02995e-05	0.97569
			11.89	0.02423	7.58791e-05	0.97569
			11.895	0.02423	8.1501e-05	0.97569
			11.9	0.02423	8.71935e-05	0.97568
			11.905	0.02423	9.28802e-05	0.97568
			11.91	0.02423	9.81121e-05	0.97567
			11.915	0.02424	0.000103101	0.97565
			11.92	0.02425	0.000108085	0.97564
			11.925	0.02427	0.000111796	0.97561
			11.93	0.0243	0.000115388	0.97559
			11.935	0.02432	0.000118663	0.97556
			11.94	0.02435	0.000120441	0.97553
			11.945	0.02439	0.000122216	0.97549
			11.95	0.02443	0.000123203	0.97545
			11.955	0.02448	0.000123119	0.9754
			11.96	0.02453	0.000123035	0.97535
			11.965	0.02458	0.000121898	0.97529
			11.97	0.02465	0.000120239	0.97523
			11.975	0.02471	0.000118581	0.97517
			11.98	0.02479	0.000115923	0.9751
			11.985	0.02487	0.000113162	0.97502
			11.99	0.02495	0.000110314	0.97494
			11.995	0.02504	0.000106905	0.97486
			12	0.02513	0.000103498	0.97477
			12.005	0.02523	0.000100087	0.97467
			12.01	0.02533	9.66664e-05	0.97457
			12.015	0.02543	9.32488e-05	0.97447
			12.02	0.02554	8.96952e-05	0.97437
			12.025	0.02565	8.6043e-05	0.97426
			12.03	0.02577	8.23941e-05	0.97415
			12.035	0.02588	7.85196e-05	0.97404
			12.04	0.026	7.45882e-05	0.97393
			12.045	0.02611	7.06603e-05	0.97382
			12.05	0.02623	6.63998e-05	0.97371
			12.055	0.02634	6.21427e-05	0.9736
			12.06	0.02645	5.78363e-05	0.97349
			12.065	0.02656	5.33193e-05	0.97339
			12.07	0.02667	4.88062e-05	0.97328
			12.075	0.02677	4.42778e-05	0.97319
			12.08	0.02687	3.97244e-05	0.97309
			12.085	0.02696	3.51742e-05	0.973
			12.09	0.02705	3.07888e-05	0.97292
			12.095	0.02713	2.65259e-05	0.97284
			12.1	0.02722	2.22668e-05	0.97276
			12.105	0.02729	1.84736e-05	0.97269
			12.11	0.02735	1.48366e-05	0.97263
			12.115	0.02742	1.12022e-05	0.97257
			12.12	0.02747	8.37252e-06	0.97252
			12.125	0.02753	5.61026e-06	0.97247
			12.13	0.02758	3.03376e-06	0.97242
			12.135	0.02761	2.29366e-06	0.97238
			12.14	0.02765	1.55422e-06	0.97235
			12.145	0.02769	1e-06	0.97231
			12.15	0.02771	1e-06	0.97229
			12.155	0.02774	1e-06	0.97226
			12.16	0.02776	1e-06	0.97224
			12.165	0.02777	1e-06	0.97223
			12.17	0.02779	1e-06	0.97221
			12.175	0.0278	1e-06	0.9722
			12.18	0.02781	1e-06	0.97219
			12.185	0.02782	1e-06	0.97218
			12.19	0.02782	1e-06	0.97218
			12.195	0.02783	1e-06	0.97217
			12.2	0.02783	1e-06	0.97217
			12.205	0.02783	1e-06	0.97217
			12.21	0.02783	1e-06	0.97217
			12.215	0.02783	1e-06	0.97216
			12.22	0.02784	1e-06	0.97216
			12.225	0.02784	1e-06	0.97216
			12.23	0.02784	1e-06	0.97216
			12.235	0.02784	1e-06	0.97216
			12.24	0.02784	1e-06	0.97216
			12.245	0.02784	1e-06	0.97216
			12.25	0.02784	1e-06	0.97216
			12.255	0.02784	1e-06	0.97216
			12.26	0.02784	1e-06	0.97216
			12.265	0.02784	1e-06	0.97215
			12.27	0.02785	1e-06	0.97215
			12.275	0.02785	1e-06	0.97215
			12.28	0.02785	1e-06	0.97215
			12.285	0.02786	1e-06	0.97214
			12.29	0.02786	1e-06	0.97214
			12.295	0.02787	1e-06	0.97213
			12.3	0.02787	1e-06	0.97213
			12.305	0.02788	1e-06	0.97212
			12.31	0.02789	1e-06	0.97211
			12.315	0.02789	1e-06	0.97211
			12.32	0.0279	1e-06	0.9721
			12.325	0.02791	1e-06	0.97209
			12.33	0.02792	1e-06	0.97208
			12.335	0.02793	1e-06	0.97207
			12.34	0.02794	1e-06	0.97206
			12.345	0.02795	1e-06	0.97204
			12.35	0.02797	1.00144e-06	0.97203
			12.355	0.02799	1.00331e-06	0.97201
			12.36	0.028	1.00517e-06	0.972
			12.365	0.02802	1.22601e-06	0.97198
			12.37	0.02804	1.49209e-06	0.97196
			12.375	0.02806	1.75797e-06	0.97194
			12.38	0.02808	2.06763e-06	0.97192
			12.385	0.02811	2.38317e-06	0.97189
			12.39	0.02813	2.69846e-06	0.97187
			12.395	0.02816	2.18771e-06	0.97184
			12.4	0.02819	1.60625e-06	0.97181
			12.405	0.02821	1.02534e-06	0.97179
			12.41	0.02825	1e-06	0.97175
			12.415	0.02828	1e-06	0.97172
			12.42	0.02831	1e-06	0.97169
			12.425	0.02834	1e-06	0.97166
			12.43	0.02838	1e-06	0.97162
			12.435	0.02841	1e-06	0.97159
			12.44	0.02845	1e-06	0.97155
			12.445	0.02849	1e-06	0.97151
			12.45	0.02852	1e-06	0.97148
			12.455	0.02856	1e-06	0.97144
			12.46	0.0286	1e-06	0.9714
			12.465	0.02864	1e-06	0.97136
			12.47	0.02868	1e-06	0.97132
			12.475	0.02871	1e-06	0.97129
			12.48	0.02875	1.00066e-06	0.97125
			12.485	0.02879	1.02381e-06	0.97121
			12.49	0.02882	1.04696e-06	0.97118
			12.495	0.02886	1.14104e-06	0.97114
			12.5	0.02889	4.51712e-06	0.97111
			12.505	0.02892	7.89062e-06	0.97107
			12.51	0.02896	1.12786e-05	0.97103
			12.515	0.02898	1.72686e-05	0.971
			12.52	0.02901	2.32528e-05	0.97096
			12.525	0.02904	2.92325e-05	0.97093
			12.53	0.02907	3.47078e-05	0.9709
			12.535	0.02909	4.01699e-05	0.97087
			12.54	0.02911	4.56278e-05	0.97084
			12.545	0.02913	4.98026e-05	0.97082
			12.55	0.02915	5.3914e-05	0.97079
			12.555	0.02917	5.80223e-05	0.97077
			12.56	0.02919	6.03081e-05	0.97075
			12.565	0.02921	6.24329e-05	0.97073
			12.57	0.02922	6.4556e-05	0.97071
			12.575	0.02923	6.46012e-05	0.9707
			12.58	0.02925	6.43523e-05	0.97069
			12.585	0.02926	6.41037e-05	0.97068
			12.59	0.02927	6.18203e-05	0.97067
			12.595	0.02928	5.91072e-05	0.97066
			12.6	0.02929	5.63957e-05	0.97065
			12.605	0.0293	5.1972e-05	0.97065
			12.61	0.02931	4.70285e-05	0.97064
			12.615	0.02932	4.20889e-05	0.97064
			12.62	0.02933	3.59937e-05	0.97064
			12.625	0.02933	2.94086e-05	0.97064
			12.63	0.02934	2.28273e-05	0.97064
			12.635	0.02935	1.64279e-05	0.97064
			12.64	0.02935	1.01372e-05	0.97064
			12.645	0.02936	3.85261e-06	0.97064
			12.65	0.02936	1e-06	0.97063
			12.655	0.02937	1e-06	0.97063
			12.66	0.02937	1e-06	0.97063
			12.665	0.02938	1e-06	0.97062
			12.67	0.02938	1e-06	0.97062
			12.675	0.02938	1e-06	0.97062
			12.68	0.02938	1e-06	0.97062
			12.685	0.02938	1e-06	0.97062
			12.69	0.02938	1e-06	0.97062
			12.695	0.02938	1e-06	0.97062
			12.7	0.02938	1e-06	0.97062
			12.705	0.02937	1e-06	0.97063
			12.71	0.02937	1e-06	0.97063
			12.715	0.02936	1e-06	0.97064
			12.72	0.02936	1e-06	0.97064
			12.725	0.02935	1e-06	0.97065
			12.73	0.02934	1e-06	0.97066
			12.735	0.02933	1e-06	0.97067
			12.74	0.02932	1e-06	0.97068
			12.745	0.02931	1e-06	0.97069
			12.75	0.0293	1e-06	0.9707
			12.755	0.02929	1e-06	0.97071
			12.76	0.02927	1e-06	0.97073
			12.765	0.02926	1e-06	0.97074
			12.77	0.02924	1e-06	0.97076
			12.775	0.02923	1e-06	0.97077
			12.78	0.02921	1e-06	0.97079
			12.785	0.02919	1e-06	0.97081
			12.79	0.02918	1e-06	0.97082
			12.795	0.02916	1e-06	0.97084
			12.8	0.02914	1e-06	0.97086
			12.805	0.02912	1.00781e-06	0.97088
			12.81	0.0291	1.03233e-06	0.9709
			12.815	0.02908	1.05684e-06	0.97092
			12.82	0.02906	1.62995e-06	0.97094
			12.825	0.02904	5.24127e-06	0.97095
			12.83	0.02903	8.84969e-06	0.97097
			12.835	0.02901	1.24559e-05	0.97098
			12.84	0.02899	1.59818e-05	0.97099
			12.845	0.02897	1.95038e-05	0.97101
			12.85	0.02896	2.3023e-05	0.97102
			12.855	0.02894	2.54988e-05	0.97103
			12.86	0.02893	2.77095e-05	0.97104
			12.865	0.02891	2.99189e-05	0.97106
			12.87	0.0289	3.11601e-05	0.97107
			12.875	0.02889	3.17828e-05	0.97108
			12.88	0.02888	3.2405e-05	0.97109
			12.885	0.02887	3.24222e-05	0.9711
			12.89	0.02886	3.1581e-05	0.9711
			12.895	0.02886	3.07408e-05	0.97111
			12.9	0.02885	2.97065e-05	0.97112
			12.905	0.02885	2.79353e-05	0.97112
			12.91	0.02885	2.61654e-05	0.97113
			12.915	0.02884	2.43971e-05	0.97113
			12.92	0.02884	2.24606e-05	0.97113
			12.925	0.02885	2.05247e-05	0.97113
			12.93	0.02885	1.85903e-05	0.97113
			12.935	0.02885	1.70835e-05	0.97113
			12.94	0.02886	1.57017e-05	0.97112
			12.945	0.02887	1.43206e-05	0.97112
			12.95	0.02887	1.34786e-05	0.97111
			12.955	0.02889	1.30837e-05	0.9711
			12.96	0.0289	1.26891e-05	0.97109
			12.965	0.02891	1.26074e-05	0.97108
			12.97	0.02892	1.32233e-05	0.97106
			12.975	0.02894	1.38386e-05	0.97105
			12.98	0.02895	1.45002e-05	0.97103
			12.985	0.02897	1.58364e-05	0.97101
			12.99	0.02899	1.71718e-05	0.97099
			12.995	0.02901	1.85061e-05	0.97097
			13	0.02903	2.00745e-05	0.97095
			13.005	0.02905	2.16964e-05	0.97093
			13.01	0.02907	2.33167e-05	0.9709
			13.015	0.0291	2.49043e-05	0.97088
			13.02	0.02912	2.64648e-05	0.97086
			13.025	0.02914	2.80234e-05	0.97083
			13.03	0.02916	2.95281e-05	0.97081
			13.035	0.02919	3.0895e-05	0.97078
			13.04	0.02921	3.22611e-05	0.97076
			13.045	0.02924	3.36257e-05	0.97073
			13.05	0.02926	3.48714e-05	0.9707
			13.055	0.02928	3.61161e-05	0.97068
			13.06	0.02931	3.736e-05	0.97065
			13.065	0.02933	3.86315e-05	0.97063
			13.07	0.02936	3.9913e-05	0.9706
			13.075	0.02938	4.11938e-05	0.97058
			13.08	0.0294	4.25308e-05	0.97055
			13.085	0.02943	4.39449e-05	0.97053
			13.09	0.02945	4.53573e-05	0.97051
			13.095	0.02947	4.678e-05	0.97048
			13.1	0.02949	4.82801e-05	0.97046
			13.105	0.02951	4.9779e-05	0.97044
			13.11	0.02953	5.12766e-05	0.97041
			13.115	0.02955	5.27064e-05	0.97039
			13.12	0.02958	5.41195e-05	0.97037
			13.125	0.0296	5.55315e-05	0.97035
			13.13	0.02961	5.6804e-05	0.97033
			13.135	0.02963	5.79314e-05	0.97031
			13.14	0.02965	5.90579e-05	0.97029
			13.145	0.02967	6.01184e-05	0.97027
			13.15	0.02969	6.08422e-05	0.97025
			13.155	0.02971	6.15655e-05	0.97023
			13.16	0.02972	6.22882e-05	0.97022
			13.165	0.02974	6.26811e-05	0.9702
			13.17	0.02975	6.30048e-05	0.97018
			13.175	0.02977	6.33282e-05	0.97017
			13.18	0.02979	6.34949e-05	0.97015
			13.185	0.0298	6.34936e-05	0.97013
			13.19	0.02982	6.34922e-05	0.97012
			13.195	0.02983	6.34564e-05	0.9701
			13.2	0.02985	6.31887e-05	0.97009
			13.205	0.02986	6.29213e-05	0.97007
			13.21	0.02988	6.2654e-05	0.97006
			13.215	0.02989	6.21652e-05	0.97004
			13.22	0.02991	6.16094e-05	0.97003
			13.225	0.02992	6.10542e-05	0.97001
			13.23	0.02994	6.03514e-05	0.97
			13.235	0.02996	5.94249e-05	0.96998
			13.24	0.02997	5.84991e-05	0.96997
			13.245	0.02999	5.75663e-05	0.96995
			13.25	0.03001	5.62263e-05	0.96994
			13.255	0.03003	5.48874e-05	0.96992
			13.26	0.03004	5.35494e-05	0.9699
			13.265	0.03006	5.20312e-05	0.96989
			13.27	0.03008	5.04092e-05	0.96987
			13.275	0.0301	4.87881e-05	0.96985
			13.28	0.03012	4.7185e-05	0.96984
			13.285	0.03014	4.56385e-05	0.96982
			13.29	0.03016	4.4093e-05	0.9698
			13.295	0.03018	4.25489e-05	0.96978
			13.3	0.0302	4.14947e-05	0.96976
			13.305	0.03022	4.05415e-05	0.96974
			13.31	0.03024	3.9589e-05	0.96972
			13.315	0.03026	3.9083e-05	0.9697
			13.32	0.03028	3.92014e-05	0.96968
			13.325	0.0303	3.93197e-05	0.96966
			13.33	0.03032	3.94379e-05	0.96964
			13.335	0.03034	4.0826e-05	0.96962
			13.34	0.03036	4.22198e-05	0.9696
			13.345	0.03037	4.3613e-05	0.96958
			13.35	0.03039	4.56007e-05	0.96956
			13.355	0.03041	4.8049e-05	0.96954
			13.36	0.03043	5.04951e-05	0.96952
			13.365	0.03045	5.29925e-05	0.9695
			13.37	0.03047	5.58634e-05	0.96948
			13.375	0.03048	5.87324e-05	0.96946
			13.38	0.0305	6.15996e-05	0.96944
			13.385	0.03052	6.41903e-05	0.96942
			13.39	0.03053	6.66468e-05	0.9694
			13.395	0.03055	6.91011e-05	0.96939
			13.4	0.03056	7.13059e-05	0.96937
			13.405	0.03057	7.26121e-05	0.96936
			13.41	0.03058	7.39168e-05	0.96934
			13.415	0.0306	7.5221e-05	0.96933
			13.42	0.03061	7.53916e-05	0.96932
			13.425	0.03062	7.5184e-05	0.96931
			13.43	0.03062	7.49766e-05	0.9693
			13.435	0.03063	7.43885e-05	0.96929
			13.44	0.03064	7.2792e-05	0.96929
			13.445	0.03064	7.11971e-05	0.96929
			13.45	0.03065	6.96031e-05	0.96928
			13.455	0.03065	6.73209e-05	0.96928
			13.46	0.03065	6.4857e-05	0.96928
			13.465	0.03066	6.23947e-05	0.96928
			13.47	0.03066	5.98792e-05	0.96928
			13.475	0.03066	5.72356e-05	0.96928
			13.48	0.03066	5.45943e-05	0.96928
			13.485	0.03066	5.19542e-05	0.96929
			13.49	0.03066	4.96511e-05	0.96929
			13.495	0.03066	4.74372e-05	0.96929
			13.5	0.03067	4.52248e-05	0.96929
			13.505	0.03067	4.32515e-05	0.96929
			13.51	0.03067	4.18874e-05	0.96929
			13.515	0.03067	4.05241e-05	0.96929
			13.52	0.03068	3.91621e-05	0.96928
			13.525	0.03068	3.84418e-05	0.96928
			13.53	0.03069	3.7925e-05	0.96927
			13.535	0.0307	3.74084e-05	0.96926
			13.54	0.03071	3.70755e-05	0.96926
			13.545	0.03072	3.73587e-05	0.96924
			13.55	0.03073	3.76416e-05	0.96923
			13.555	0.03074	3.79243e-05	0.96922
			13.56	0.03076	3.87312e-05	0.9692
			13.565	0.03078	3.97735e-05	0.96918
			13.57	0.0308	4.08148e-05	0.96916
			13.575	0.03081	4.19651e-05	0.96914
			13.58	0.03084	4.3783e-05	0.96912
			13.585	0.03086	4.55992e-05	0.96909
			13.59	0.03088	4.74145e-05	0.96907
			13.595	0.03091	4.96829e-05	0.96904
			13.6	0.03093	5.22759e-05	0.96902
			13.605	0.03096	5.48665e-05	0.96899
			13.61	0.03098	5.74649e-05	0.96896
			13.615	0.03101	6.06742e-05	0.96893
			13.62	0.03104	6.38806e-05	0.9689
			13.625	0.03106	6.70855e-05	0.96887
			13.63	0.03109	7.03734e-05	0.96884
			13.635	0.03112	7.37684e-05	0.96881
			13.64	0.03114	7.71612e-05	0.96878
			13.645	0.03117	8.05509e-05	0.96875
			13.65	0.0312	8.35376e-05	0.96872
			13.655	0.03122	8.64517e-05	0.96869
			13.66	0.03125	8.93639e-05	0.96866
			13.665	0.03128	9.19674e-05	0.96863
			13.67	0.0313	9.36821e-05	0.96861
			13.675	0.03133	9.53948e-05	0.96858
			13.68	0.03135	9.71068e-05	0.96855
			13.685	0.03138	9.77106e-05	0.96853
			13.69	0.0314	9.77209e-05	0.9685
			13.695	0.03143	9.77312e-05	0.96848
			13.7	0.03145	9.76774e-05	0.96845
			13.705	0.03148	9.59278e-05	0.96843
			13.71	0.0315	9.41793e-05	0.9684
			13.715	0.03153	9.24321e-05	0.96838
			13.72	0.03156	9.01402e-05	0.96835
			13.725	0.03158	8.70715e-05	0.96833
			13.73	0.03161	8.40041e-05	0.9683
			13.735	0.03164	8.09396e-05	0.96828
			13.74	0.03167	7.74504e-05	0.96825
			13.745	0.0317	7.38413e-05	0.96823
			13.75	0.03173	7.02356e-05	0.9682
			13.755	0.03176	6.66698e-05	0.96817
			13.76	0.03179	6.33483e-05	0.96815
			13.765	0.03182	6.00292e-05	0.96812
			13.77	0.03185	5.67124e-05	0.96809
			13.775	0.03188	5.38185e-05	0.96806
			13.78	0.03192	5.138e-05	0.96803
			13.785	0.03195	4.89438e-05	0.968
			13.79	0.03198	4.65087e-05	0.96797
			13.795	0.03201	4.49533e-05	0.96794
			13.8	0.03204	4.35935e-05	0.96791
			13.805	0.03207	4.22345e-05	0.96788
			13.81	0.0321	4.10088e-05	0.96785
			13.815	0.03213	4.0558e-05	0.96783
			13.82	0.03216	4.01076e-05	0.9678
			13.825	0.03219	3.96575e-05	0.96777
			13.83	0.03222	3.94635e-05	0.96774
			13.835	0.03225	3.9566e-05	0.96771
			13.84	0.03227	3.96684e-05	0.96769
			13.845	0.0323	3.97707e-05	0.96766
			13.85	0.03232	4.00576e-05	0.96764
			13.855	0.03234	4.0399e-05	0.96761
			13.86	0.03237	4.07402e-05	0.96759
			13.865	0.03239	4.10889e-05	0.96757
			13.87	0.03241	4.15422e-05	0.96755
			13.875	0.03243	4.19951e-05	0.96753
			13.88	0.03244	4.24475e-05	0.96751
			13.885	0.03246	4.296e-05	0.9675
			13.89	0.03247	4.35803e-05	0.96748
			13.895	0.03249	4.41999e-05	0.96747
			13.9	0.0325	4.48194e-05	0.96745
			13.905	0.03252	4.56112e-05	0.96744
			13.91	0.03253	4.65018e-05	0.96743
			13.915	0.03254	4.7392e-05	0.96742
			13.92	0.03255	4.82814e-05	0.9674
			13.925	0.03256	4.94008e-05	0.9674
			13.93	0.03256	5.05445e-05	0.96739
			13.935	0.03257	5.16871e-05	0.96738
			13.94	0.03258	5.28328e-05	0.96737
			13.945	0.03258	5.39979e-05	0.96736
			13.95	0.03259	5.51622e-05	0.96736
			13.955	0.03259	5.63256e-05	0.96735
			13.96	0.0326	5.73299e-05	0.96734
			13.965	0.0326	5.81044e-05	0.96734
			13.97	0.03261	5.88782e-05	0.96733
			13.975	0.03261	5.96518e-05	0.96733
			13.98	0.03262	5.98741e-05	0.96732
			13.985	0.03262	5.97949e-05	0.96732
			13.99	0.03262	5.97158e-05	0.96732
			13.995	0.03263	5.96368e-05	0.96731
			14	0.03263	5.85274e-05	0.96731
			14.005	0.03264	5.72704e-05	0.96731
			14.01	0.03264	5.60143e-05	0.9673
			14.015	0.03264	5.46438e-05	0.9673
			14.02	0.03265	5.213e-05	0.9673
			14.025	0.03265	4.9618e-05	0.9673
			14.03	0.03266	4.71078e-05	0.96729
			14.035	0.03267	4.42803e-05	0.96729
			14.04	0.03267	4.07054e-05	0.96729
			14.045	0.03268	3.71322e-05	0.96728
			14.05	0.03269	3.35625e-05	0.96728
			14.055	0.03269	2.96734e-05	0.96728
			14.06	0.0327	2.54586e-05	0.96727
			14.065	0.03271	2.12479e-05	0.96727
			14.07	0.03272	1.70393e-05	0.96727
			14.075	0.03272	1.30761e-05	0.96726
			14.08	0.03273	9.23009e-06	0.96726
			14.085	0.03274	5.38596e-06	0.96725
			14.09	0.03275	1.54462e-06	0.96725
			14.095	0.03276	1e-06	0.96724
			14.1	0.03277	1e-06	0.96723
			14.105	0.03278	1e-06	0.96722
			14.11	0.03279	1e-06	0.96721
			14.115	0.0328	1e-06	0.9672
			14.12	0.03281	1e-06	0.96719
			14.125	0.03282	1e-06	0.96718
			14.13	0.03283	1e-06	0.96717
			14.135	0.03284	1e-06	0.96716
			14.14	0.03284	1e-06	0.96715
			14.145	0.03285	1e-06	0.96715
			14.15	0.03286	1e-06	0.96714
			14.155	0.03287	1e-06	0.96713
			14.16	0.03288	1e-06	0.96712
			14.165	0.03289	1e-06	0.96711
			14.17	0.03289	1e-06	0.96711
			14.175	0.0329	1e-06	0.9671
			14.18	0.03291	1e-06	0.96709
			14.185	0.03291	1e-06	0.96708
			14.19	0.03292	1.00032e-06	0.96708
			14.195	0.03293	1.00087e-06	0.96707
			14.2	0.03293	1.00141e-06	0.96706
			14.205	0.03294	1.00196e-06	0.96706
			14.21	0.03295	1.09412e-06	0.96705
			14.215	0.03295	1.2264e-06	0.96704
			14.22	0.03296	1.35858e-06	0.96704
			14.225	0.03297	1.49066e-06	0.96703
			14.23	0.03297	3.52393e-06	0.96702
			14.235	0.03298	6.03698e-06	0.96702
			14.24	0.03298	8.54817e-06	0.96701
			14.245	0.03299	1.10575e-05	0.967
			14.25	0.033	1.21054e-05	0.96699
			14.255	0.033	1.2971e-05	0.96699
			14.26	0.03301	1.38359e-05	0.96698
			14.265	0.03301	1.47002e-05	0.96697
			14.27	0.03302	1.36862e-05	0.96697
			14.275	0.03302	1.26155e-05	0.96696
			14.28	0.03303	1.15455e-05	0.96696
			14.285	0.03304	1.04211e-05	0.96695
			14.29	0.03304	8.00292e-06	0.96695
			14.295	0.03305	5.58651e-06	0.96695
			14.3	0.03305	3.17191e-06	0.96695
			14.305	0.03306	1e-06	0.96694
			14.31	0.03306	1e-06	0.96694
			14.315	0.03307	1e-06	0.96693
			14.32	0.03307	1e-06	0.96693
			14.325	0.03308	1e-06	0.96692
			14.33	0.03308	1e-06	0.96692
			14.335	0.03308	1e-06	0.96692
			14.34	0.03309	1e-06	0.96691
			14.345	0.03309	1e-06	0.96691
			14.35	0.0331	1e-06	0.9669
			14.355	0.0331	1e-06	0.9669
			14.36	0.0331	1e-06	0.9669
			14.365	0.03311	1e-06	0.96689
			14.37	0.03311	1e-06	0.96689
			14.375	0.03311	1e-06	0.96689
			14.38	0.03311	1e-06	0.96688
			14.385	0.03312	1e-06	0.96688
			14.39	0.03312	1e-06	0.96688
			14.395	0.03312	1e-06	0.96688
			14.4	0.03312	1e-06	0.96688
			14.405	0.03313	1e-06	0.96687
			14.41	0.03313	1e-06	0.96687
			14.415	0.03313	1e-06	0.96687
			14.42	0.03313	1e-06	0.96687
			14.425	0.03313	1e-06	0.96687
			14.43	0.03313	1e-06	0.96687
			14.435	0.03313	1e-06	0.96687
			14.44	0.03313	1e-06	0.96687
			14.445	0.03313	1e-06	0.96687
			14.45	0.03313	1e-06	0.96687
			14.455	0.03313	1e-06	0.96687
			14.46	0.03313	1e-06	0.96687
			14.465	0.03313	1e-06	0.96687
			14.47	0.03313	1e-06	0.96687
			14.475	0.03313	1e-06	0.96687
			14.48	0.03313	1e-06	0.96687
[truncated: 2,101 more rows]

## Sheet: Figure 4c
Figure 4c	Emissivity of glass and MMPMC at different incident angles.
Glass		MMPMC
Angle(°)		Angle(°)
0	0.78241	0	0.97571
10	0.77974	10	0.98253
20	0.77834	20	0.981
30	0.7741	30	0.9807
40	0.76503	40	0.9822
50	0.74789	50	0.97661
60	0.71517	60	0.96474
70	0.64758	70	0.93976

## Sheet: Figure 4d
Figure 4d	Net cooling power of MMPMC at different non-radiative heat coefficients (q).
Temperature difference,Ta-Tr(℃)	Cooling power(W/m2)
	q=0W/m2K	q=2W/m2K	q=4W/m2K	q=6W/m2K	q=8W/m2K
30	-17.1546	-77.1546	-137.155	-197.155	-257.155
29	-13.4132	-71.4132	-129.413	-187.413	-245.413
28	-9.62752	-65.6275	-121.628	-177.628	-233.628
27	-5.79724	-59.7972	-113.797	-167.797	-221.797
26	-1.92209	-53.9221	-105.922	-157.922	-209.922
25	1.99823	-48.0018	-98.0018	-148.002	-198.002
24	5.96397	-42.036	-90.036	-138.036	-186.036
23	9.97543	-36.0246	-82.0246	-128.025	-174.025
22	14.0329	-29.9671	-73.9671	-117.967	-161.967
21	18.1366	-23.8634	-65.8634	-107.863	-149.863
20	22.2868	-17.7132	-57.7132	-97.7132	-137.713
19	26.4839	-11.5162	-49.5162	-87.5162	-125.516
18	30.728	-5.27203	-41.272	-77.272	-113.272
17	35.0194	1.01944	-32.9806	-66.9806	-100.981
16	39.3585	7.35854	-24.6415	-56.6415	-88.6415
15	43.7455	13.7455	-16.2545	-46.2545	-76.2545
14	48.1807	20.1807	-7.81932	-35.8193	-63.8193
13	52.6643	26.6643	0.66427	-25.3357	-51.3357
12	57.1966	33.1966	9.19655	-14.8034	-38.8034
11	61.7778	39.7778	17.7778	-4.2222	-26.2222
10	66.4083	46.4083	26.4083	6.40829	-13.5917
9	71.0883	53.0883	35.0883	17.0883	-0.91173
8	75.818	59.818	43.818	27.818	11.818
7	80.5978	66.5978	52.5978	38.5978	24.5978
6	85.4278	73.4278	61.4278	49.4278	37.4278
5	90.3084	80.3084	70.3084	60.3084	50.3084
4	95.2398	87.2398	79.2398	71.2398	63.2398
3	100.222	94.2223	88.2223	82.2223	76.2223
2	105.256	101.256	97.2561	93.2561	89.2561
1	110.342	108.342	106.342	104.342	102.342
0	115.479	115.479	115.479	115.479	115.479
-1	120.668	122.668	124.668	126.668	128.668
-2	125.91	129.91	133.91	137.91	141.91
-3	131.204	137.204	143.204	149.204	155.204
-4	136.551	144.551	152.551	160.551	168.551
-5	141.951	151.951	161.951	171.951	181.951
-6	147.405	159.405	171.405	183.405	195.405
-7	152.912	166.912	180.912	194.912	208.912
-8	158.473	174.473	190.473	206.473	222.473
-9	164.088	182.088	200.088	218.088	236.088
-10	169.758	189.758	209.758	229.758	249.758
-11	175.482	197.482	219.482	241.482	263.482
-12	181.261	205.261	229.261	253.261	277.261
-13	187.095	213.095	239.095	265.095	291.095
-14	192.984	220.984	248.984	276.984	304.984
-15	198.929	228.929	258.929	288.929	318.929
-16	204.929	236.929	268.929	300.929	332.929
-17	210.986	244.986	278.986	312.986	346.986
-18	217.099	253.099	289.099	325.099	361.099
-19	223.268	261.268	299.268	337.268	375.268
-20	229.494	269.494	309.494	349.494	389.494
-21	235.777	277.777	319.777	361.777	403.777
-22	242.117	286.117	330.117	374.117	418.117
-23	248.515	294.515	340.515	386.515	432.515
-24	254.97	302.97	350.97	398.97	446.97
-25	261.483	311.483	361.483	411.483	461.483
-26	268.054	320.054	372.054	424.054	476.054
-27	274.683	328.683	382.683	436.683	490.683
-28	281.371	337.371	393.371	449.371	505.371
-29	288.118	346.118	404.118	462.118	520.118
-30	294.924	354.924	414.924	474.924	534.924

[truncated: 15 more sheets: Figure 4f, Supplementary Figure 4, Supplementary Figure 5, Supplementary Figure 6, Supplementary Figure 9, Supplementary Figure 12a, Supplementary Figure 12b, Supplementary Figure 13, Supplementary Figure 14, Supplementary Figure 15, Supplementary Figure 16, Supplementary Figure 17, Supplementary Figure 19, Supplementary Figure 20, Supplementary Figure 21]
